# Supplementary material for: Cardiovascular Performance Measurement in Water Fleas by Utilizing High-Speed Videography and ImageJ Software and Its Application for Pesticide Toxicity Assessment
Source: MDPI journal article supplement (doi:10.3390/ani10091587), 2020-09-05

## Supplementary protocol

### **Cardiovascular Performance Measurement in Water Fleas by Utilizing High-speed Videography and ImageJ Software and Its Application for Pesticide Toxicity Assessment**

Fiorency Santoso 1,2, Viacheslav V. Krylov 3, Agnes L. Castillo 4, Ferry Saputra 1, Hong-Ming Chen 5, Hong-Thih Lai 5 \* and Chung-Der Hsiao 1,6,7 \*

1. Department of Bioscience Technology, Chung Yuan Christian University, Chung-Li 320314, Taiwan
2. Master program of Nanotechnology, Chung Yuan Christian University, Chung-Li 320314, Taiwan
3. Papanin Institute for Biology of Inland Waters, Russian Academy of Sciences, Borok, Nekouzskii raion, Yaroslavl oblast, 152742 Russia
4. Faculty of Pharmacy, The Graduate School and Research Center for the Natural and Applied Sciences, University of Santo Tomas, Manila 1008 Philippines
5. Department of Aquatic Biosciences, National Chiayi University, 300 Syuefu Rd. Chiayi, 60004 Taiwan
6. Department of Chemistry, Chung Yuan Christian University, Chung-Li 320314, Taiwan
7. Center for Nanotechnology, Chung Yuan Christian University, Chung-Li 320314, Taiwan

\* corresponding to Hong-Thih Lai (htlai@mail.ncyu.edu.tw); Chung-Der Hsiao (cdhsiao@cycu.edu.tw)

# Required Software

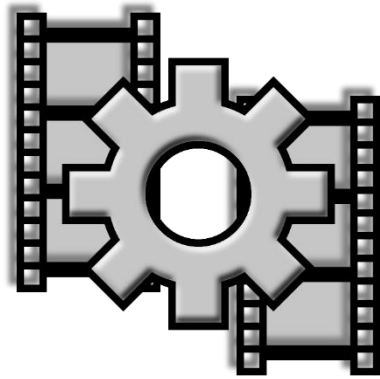

VirtualDub

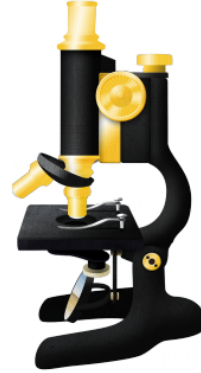

ImageJ

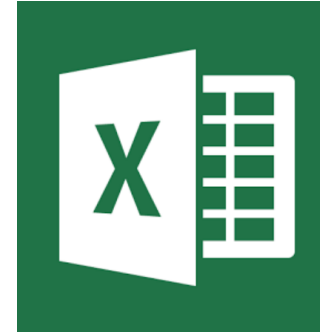

Excel

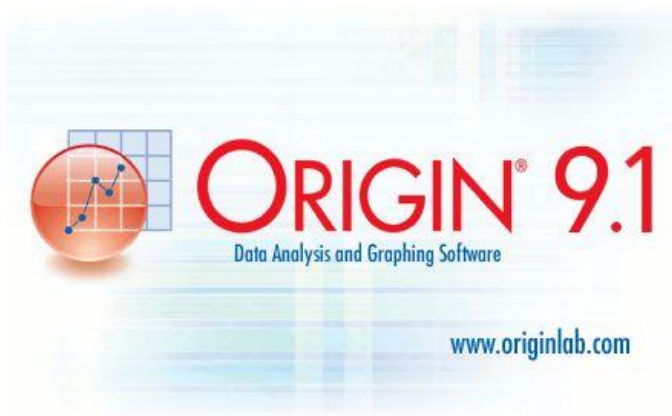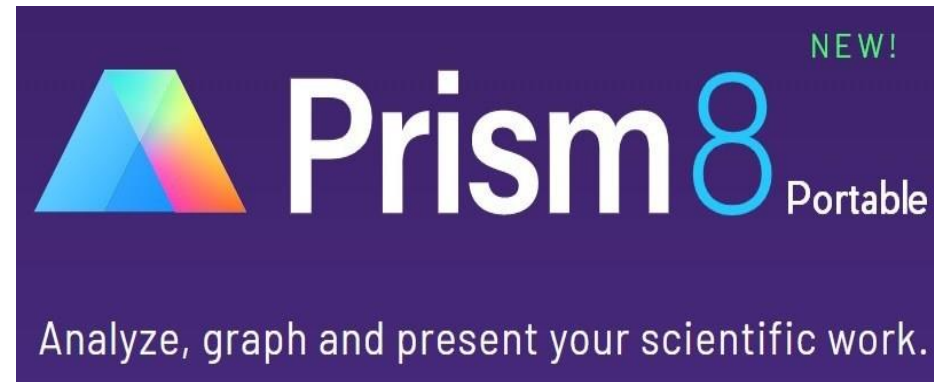

**High speed Video  
recording**

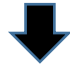

**Blood flow velocity  
calculation**

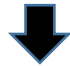

**Heartbeat  
calculation**

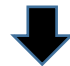

**Cardiac function  
assessment**

## Outline of analysis pipeline

**Heartbeat rate  
(HR)**

**SFFT**

**Poincare plot**

**Stroke volume  
(SV)**

**Fractional  
Shortening (FS)**

**Cardiac output  
(CO)**

**Ejection Fraction  
(EF)**

1

# Video Capture Apparatus

Inverted  
Microscope

High Speed CCD

To capture  
heart and blood  
flow images

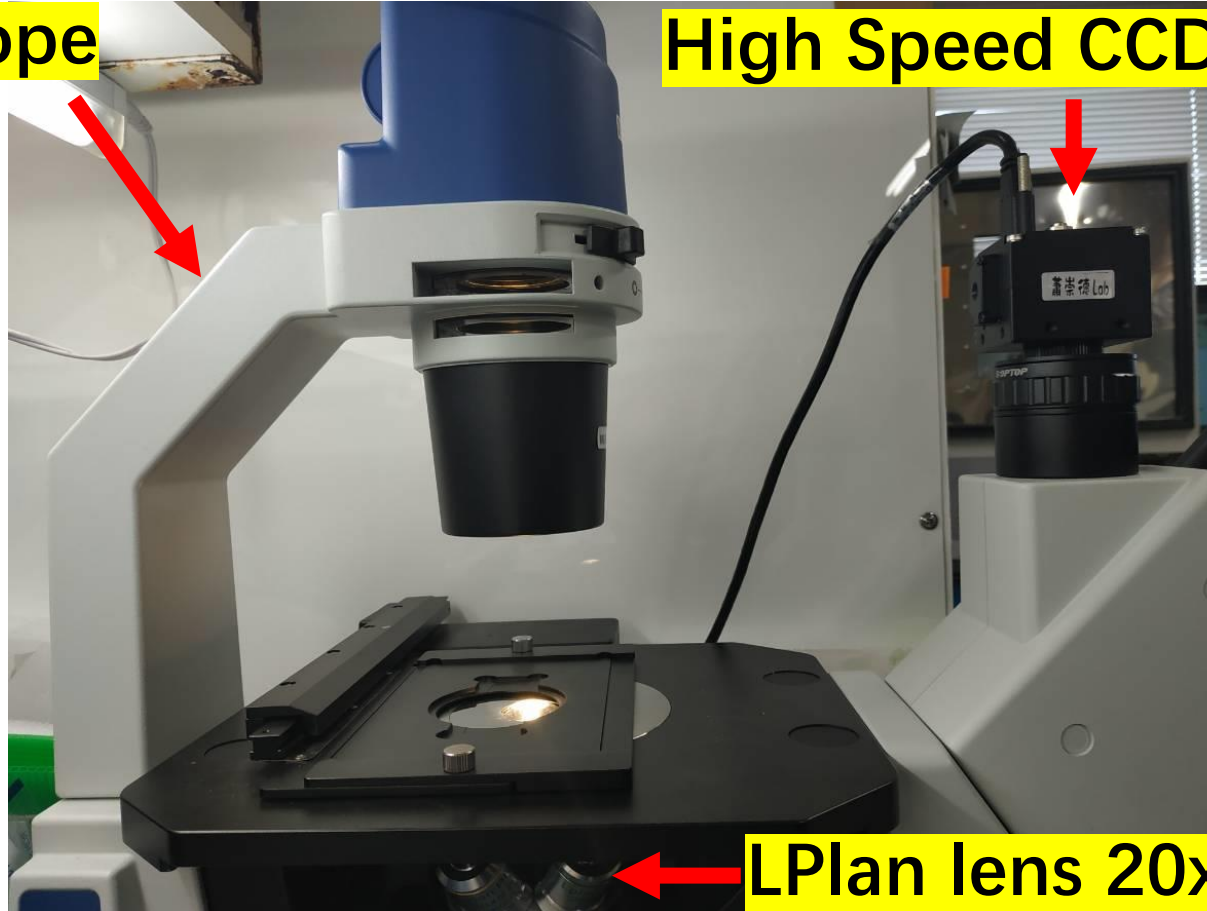

LPlan lens 20x

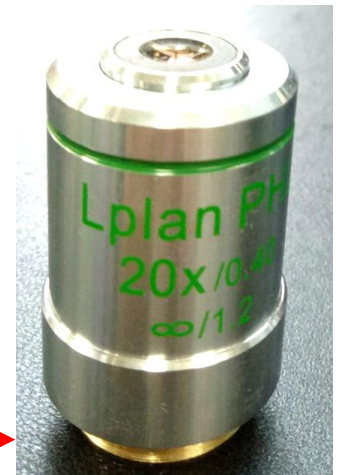

1

# Video Recording using HiBestViewer App

(AZ Instrument, Taiwan)

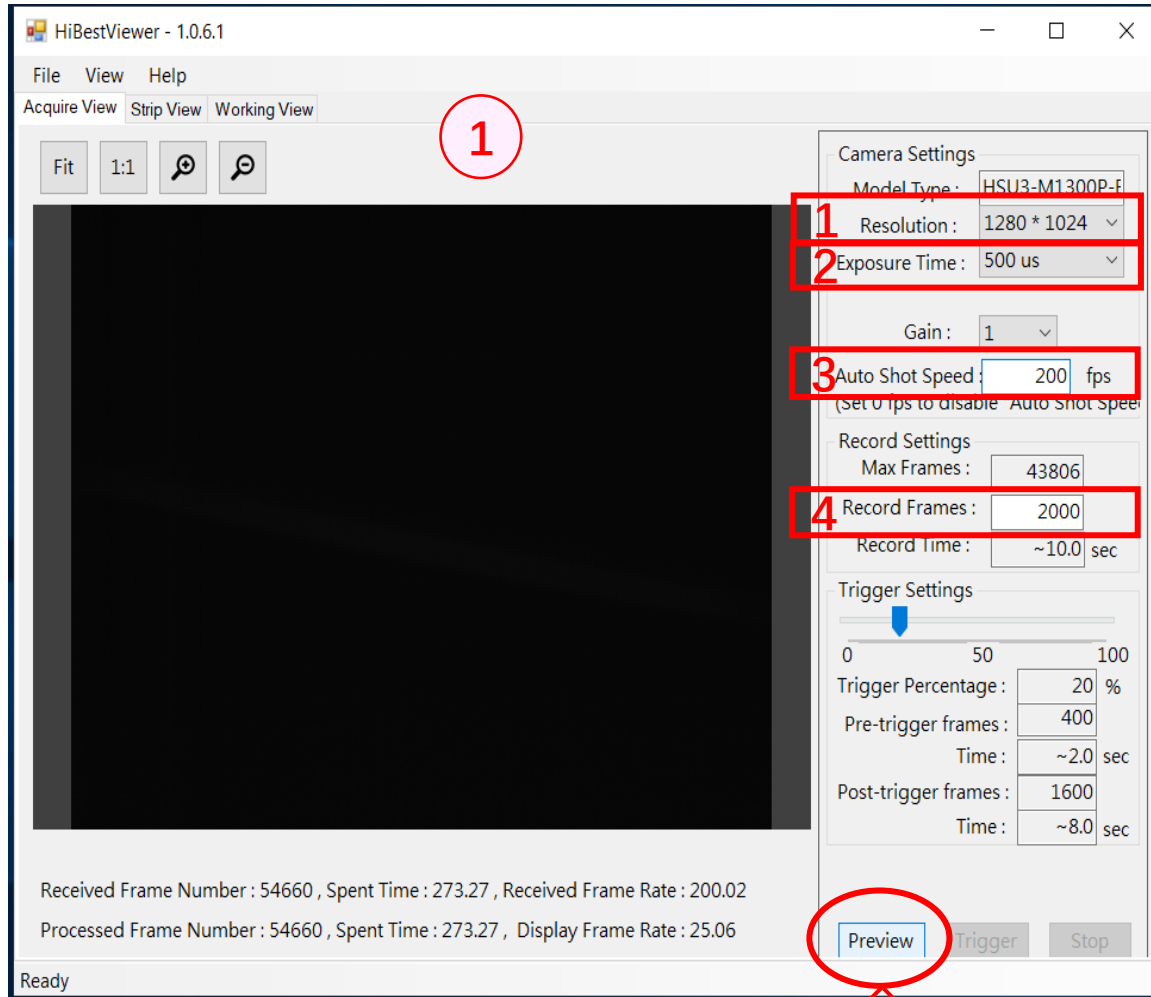

5. After setting up,  
choose preview

- **Resolution** : measure used to describe the sharpness and clarity of an image.
- **Exposure time** : length of time when the digital sensor inside the camera is exposed to light. The resolution & exposure time supported by camera is limited, so user is only allowed to select appropriate one.
- **Auto Shot Speed** : how many photos the unit can take within one second (fps)
- **Record Frames**: Set up the number of images which want to be stored. User can set up the value based on requirements, but the maximum cannot be over the former field (Max Frames), and the minimum cannot be less than or equal to 0

# Preview Result (*Daphnia magna* heart)

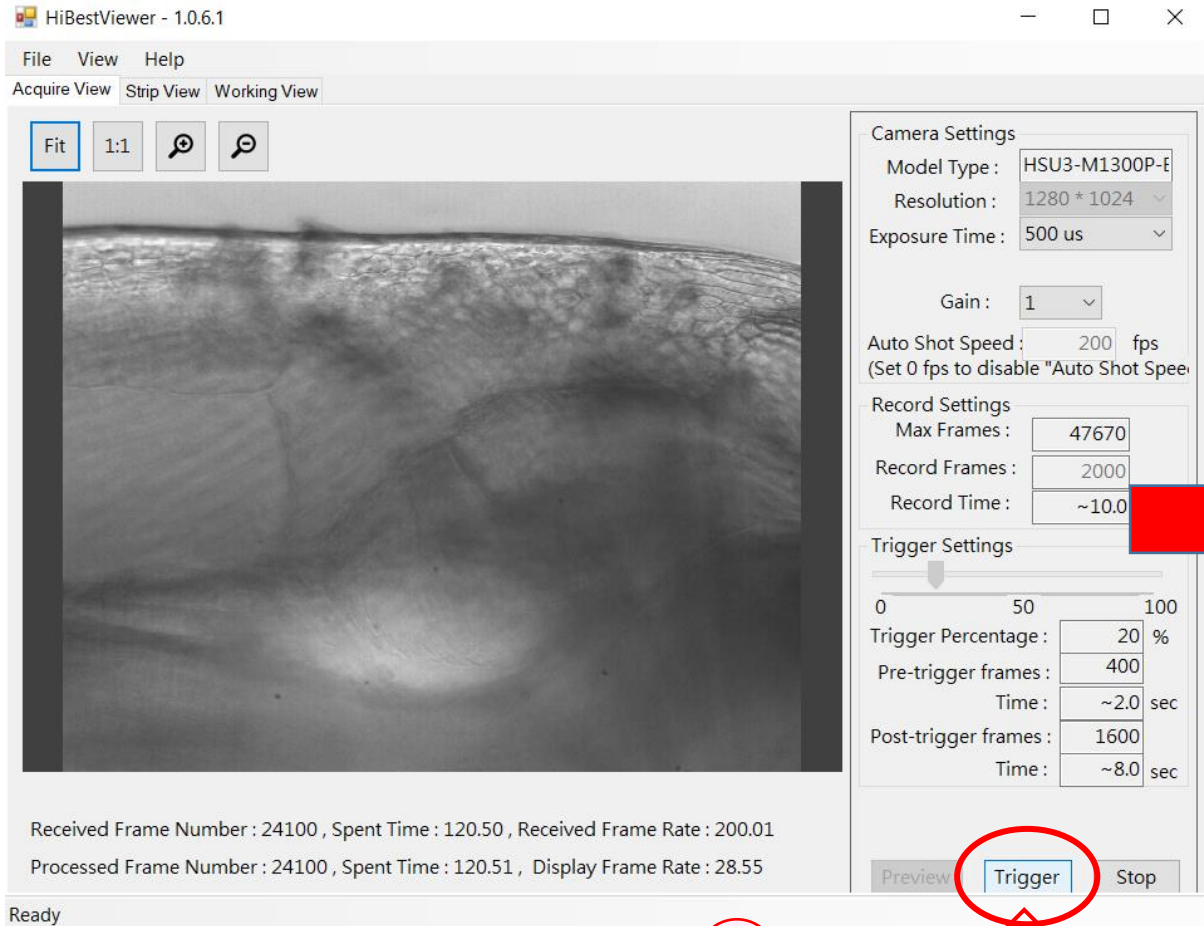

2

Perform **Trigger** to start video recording

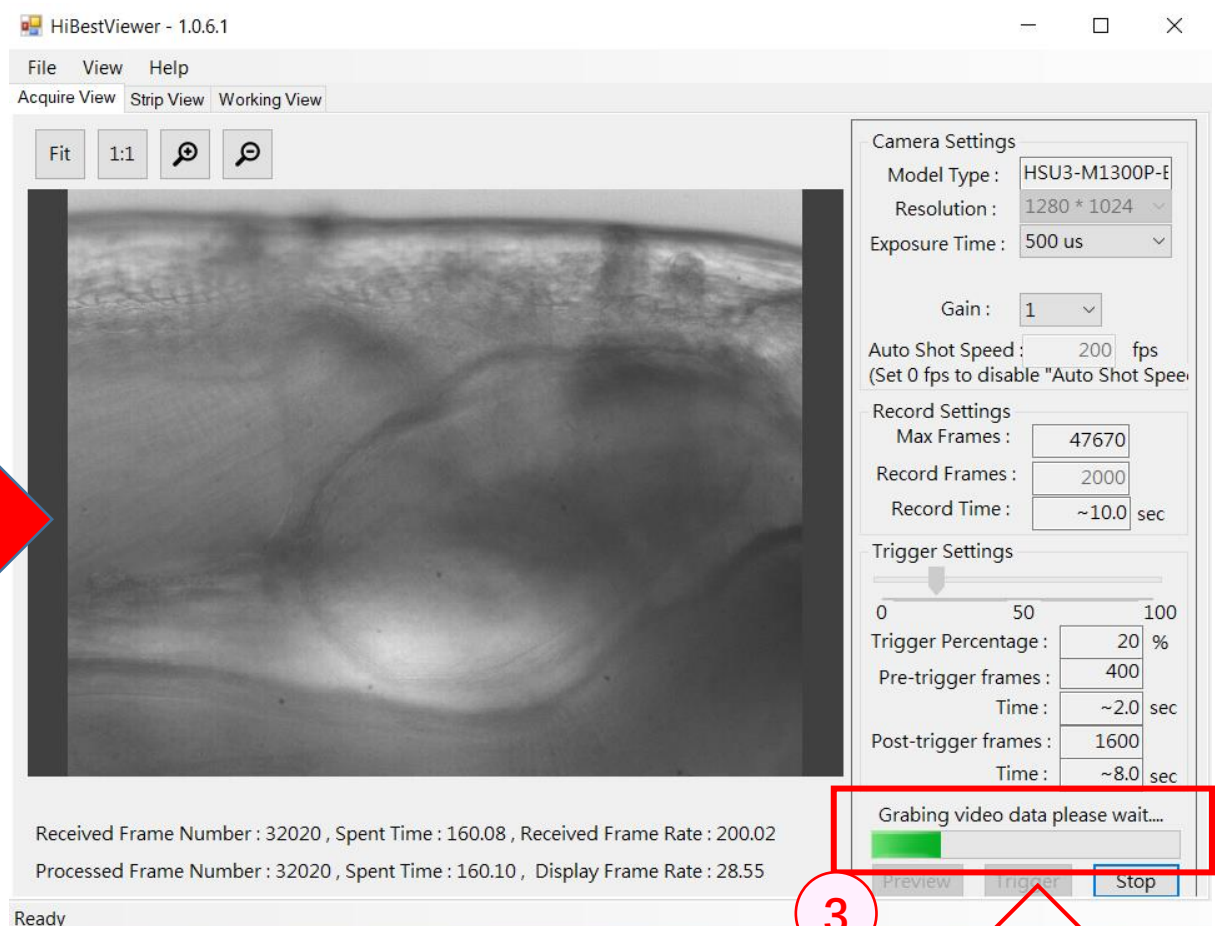

3

Video is recorded @ 200 fps



# Preview Result

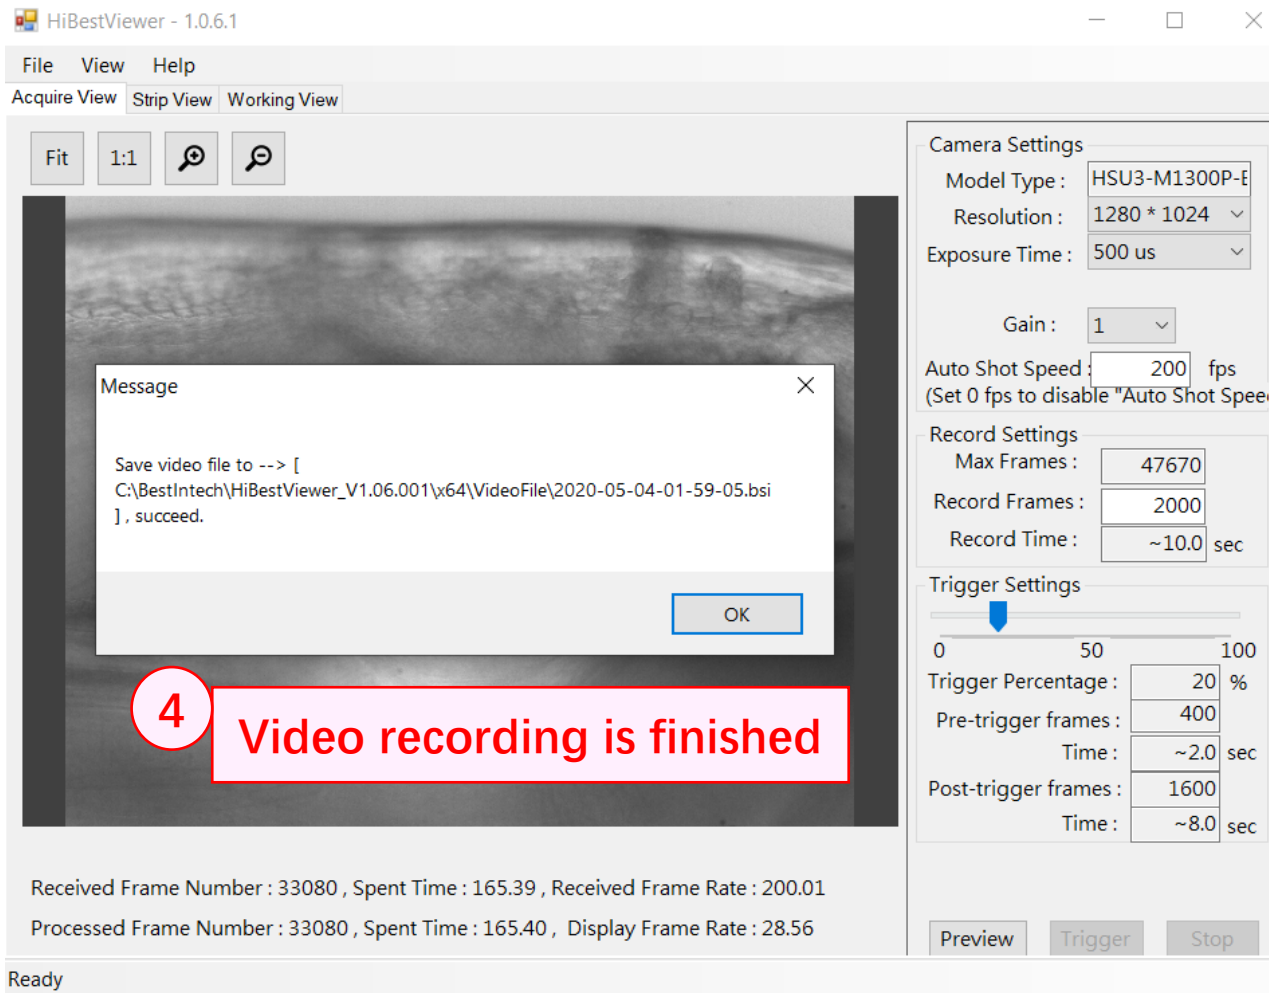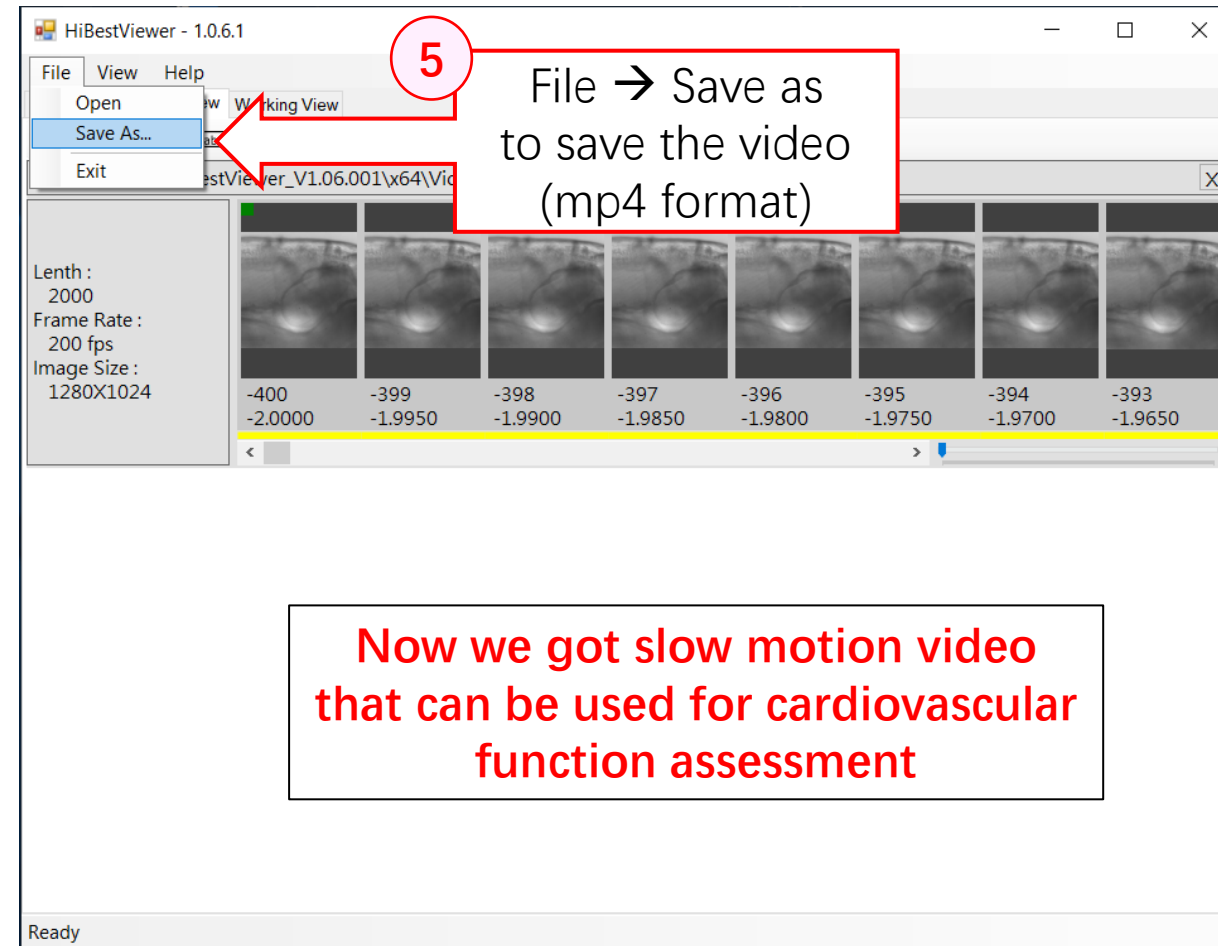

Now we got slow motion video that can be used for cardiovascular function assessment

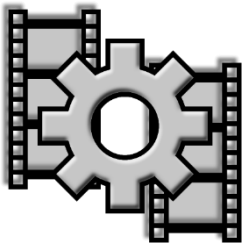

# Convert to Uncompressed Format in VirtualDub

Virtual Dub will convert the original video (.mp4 format into .avi format)

**ImageJ can only proceed** file format (uncompressed AVI) **from Virtual Dub**

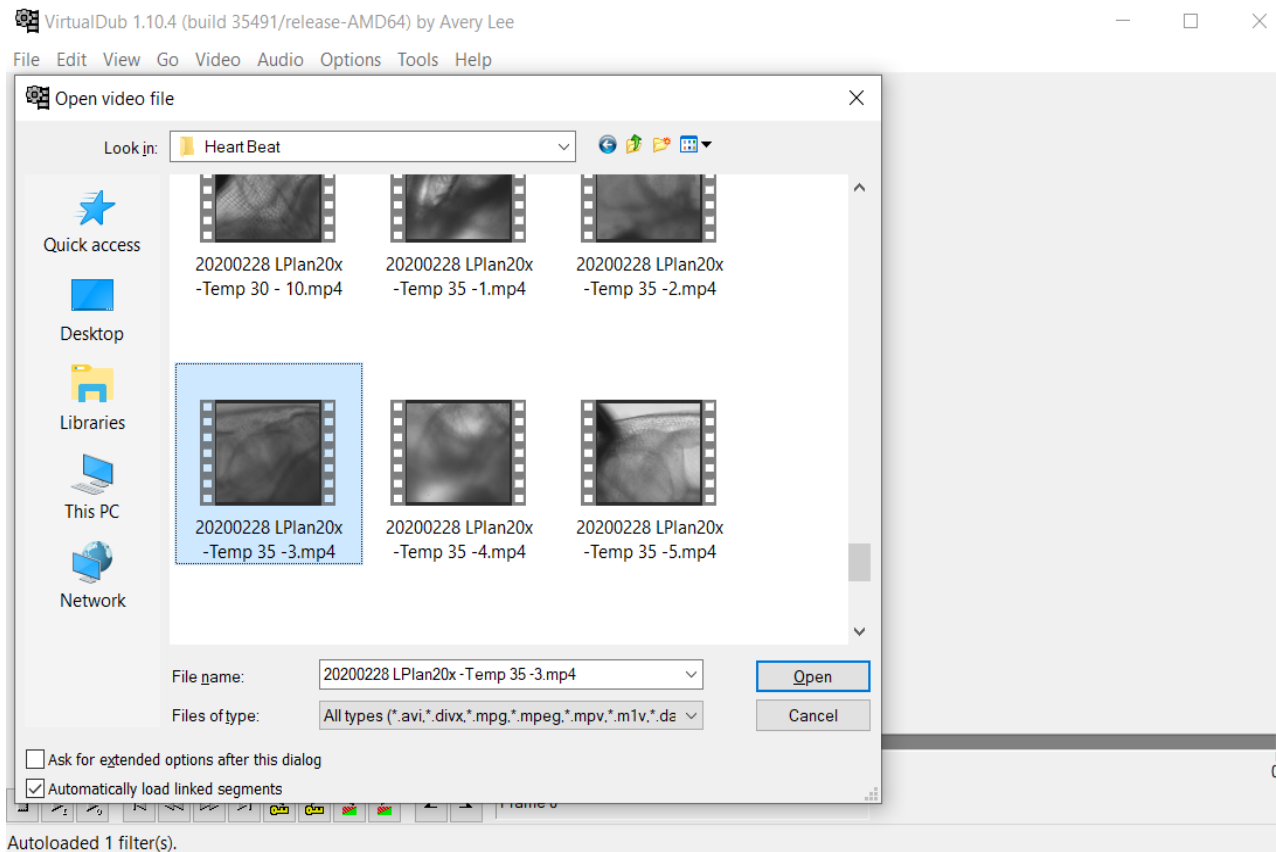

- Click **Ctrl+O** to select the video file
- Click **F7** function key to convert the file format to uncompressed AVI



**High speed Video  
recording**

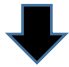

**Blood flow velocity  
calculation**

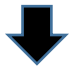

**Heartbeat  
calculation**

**Heartbeat rate  
(HR)**

**SFFT**

**Poincare plot**

**Cardiac function  
assessment**

**Stroke volume  
(SV)**

**Fractional  
Shortening (FS)**

**Cardiac output  
(CO)**

**Ejection Fraction  
(EF)**

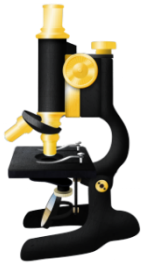

# Open the Video and Convert it into Grayscale

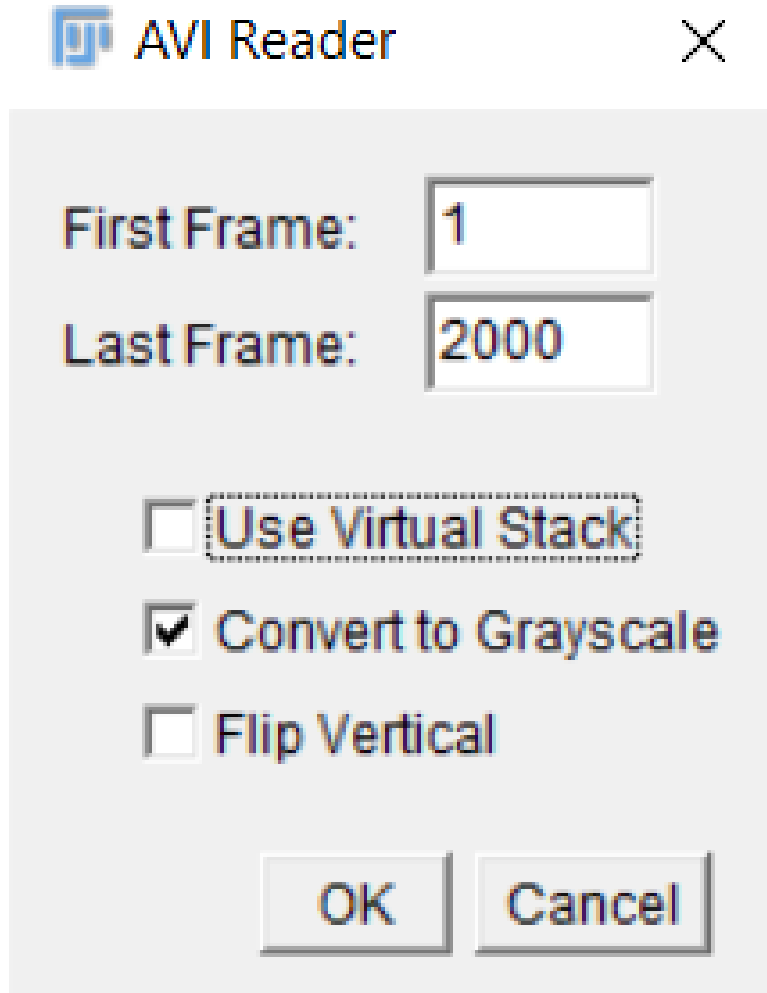

- Drag the video from Virtual Dub format to the ImageJ and convert it into grayscale

# Use **MTrackJ** plugin for blood flow calculation

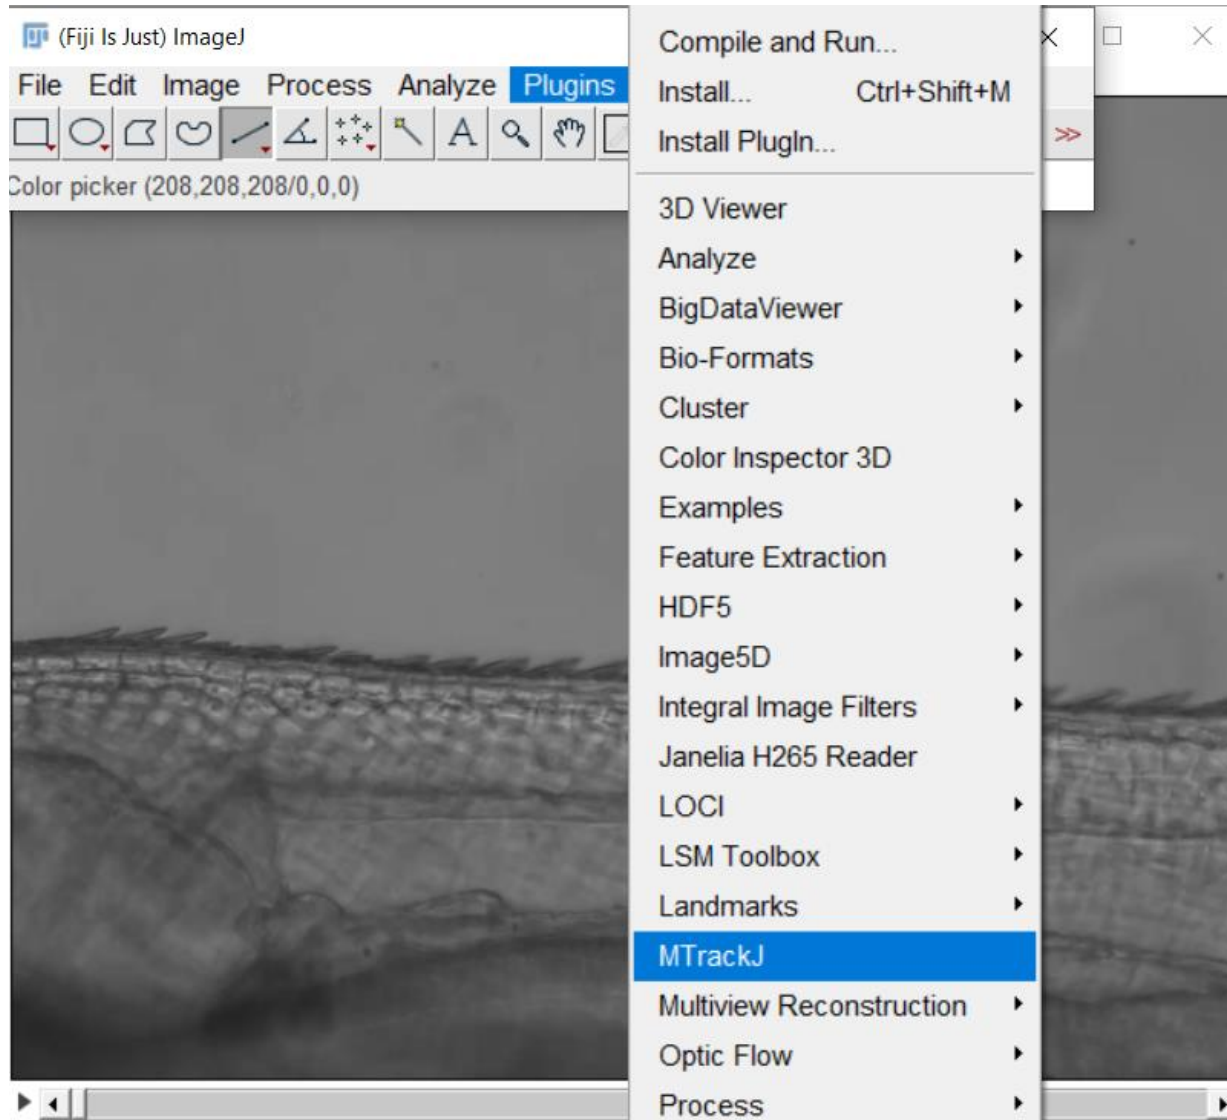

- Select Plugins -> MTrackJ

**MTrackJ** is used for tracking of moving objects in image sequences and the measurement of track statistics.

# MTrackJ Setup for single hemocyte tracking

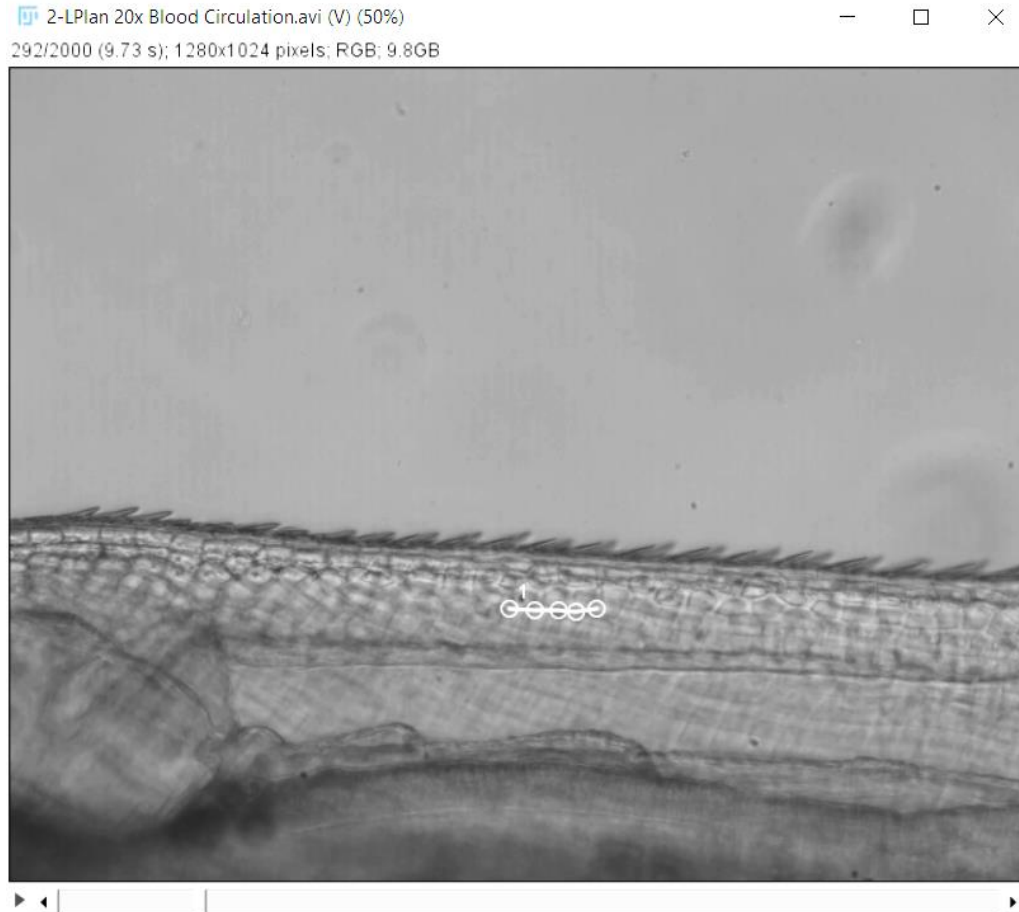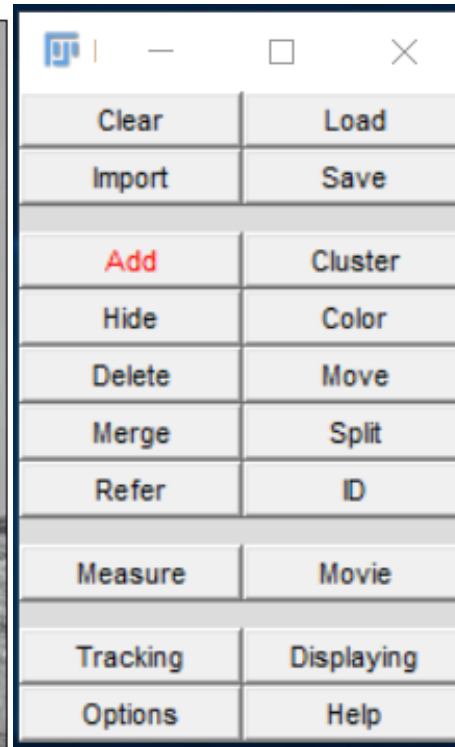

- Select add, then choose blood cell with highest velocity (here we usually select 5 positions for single moving hemocyte)

# Measure the Blood Flow Distance

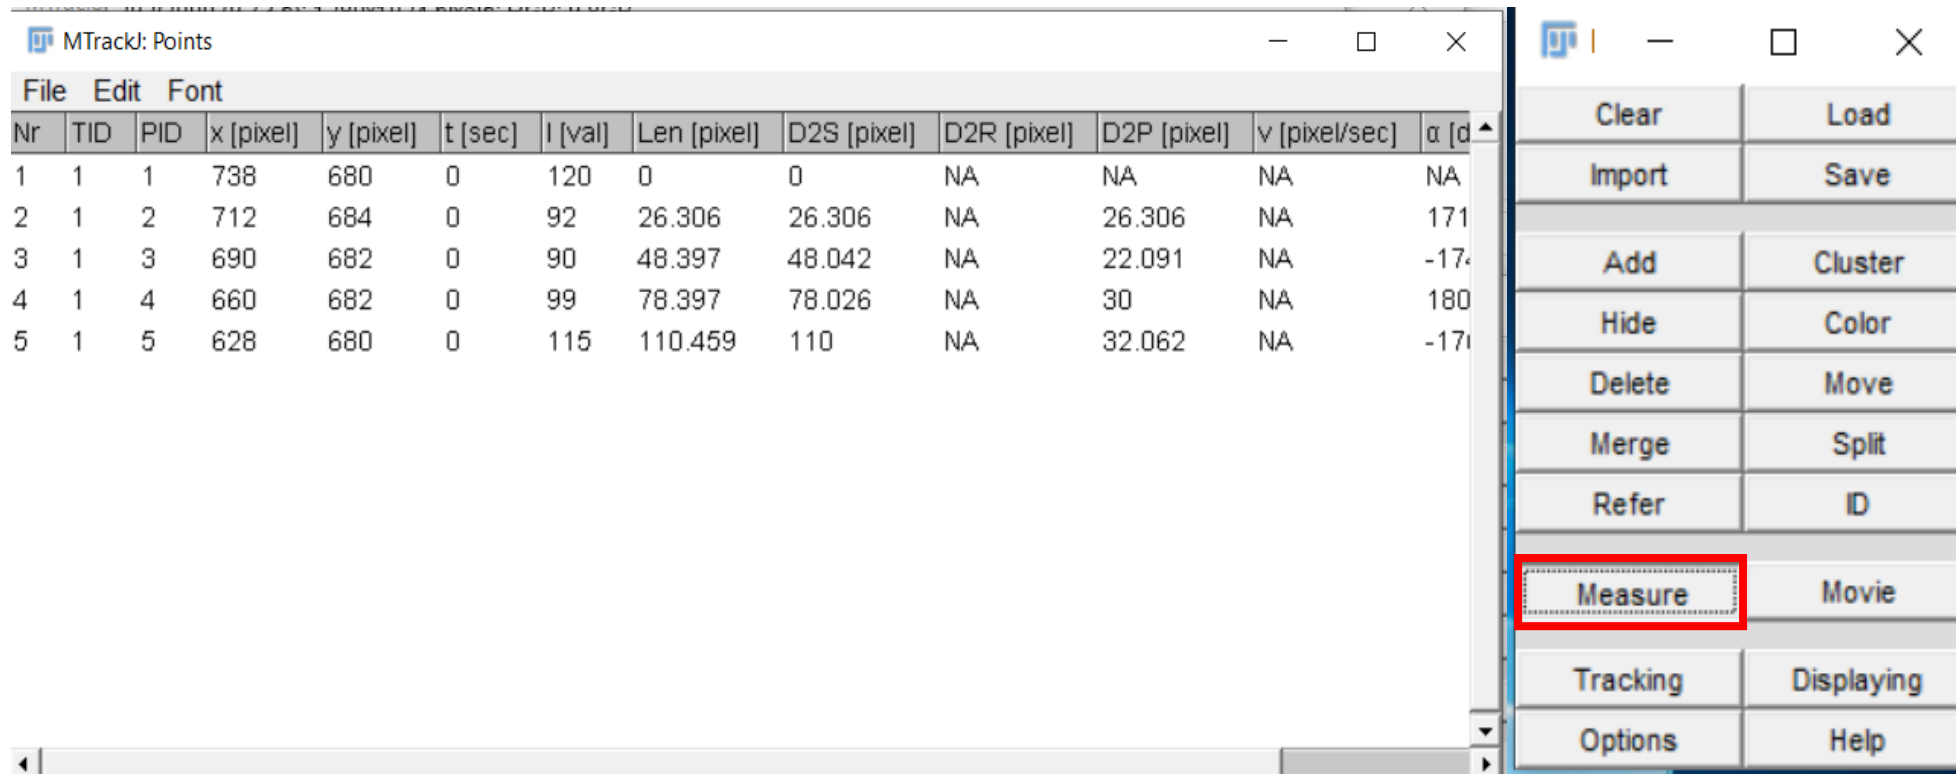

| Nr | TID | PID | x [pixel] | y [pixel] | t [sec] | l [val] | Len [pixel] | D2S [pixel] | D2R [pixel] | D2P [pixel] | v [pixel/sec] | $\alpha$ [d] |
|----|-----|-----|-----------|-----------|---------|---------|-------------|-------------|-------------|-------------|---------------|--------------|
| 1  | 1   | 1   | 738       | 680       | 0       | 120     | 0           | 0           | NA          | NA          | NA            | NA           |
| 2  | 1   | 2   | 712       | 684       | 0       | 92      | 26.306      | 26.306      | NA          | 26.306      | NA            | 171          |
| 3  | 1   | 3   | 690       | 682       | 0       | 90      | 48.397      | 48.042      | NA          | 22.091      | NA            | -17          |
| 4  | 1   | 4   | 660       | 682       | 0       | 99      | 78.397      | 78.026      | NA          | 30          | NA            | 180          |
| 5  | 1   | 5   | 628       | 680       | 0       | 115     | 110.459     | 110         | NA          | 32.062      | NA            | -17          |

- Select measure to get the raw data and copy it to Excel
- MTrackJ measurement is used to discover the x,y coordinates of each blood cell, and we can further convert it into moving distance

|    | A      | B   | C   | D         | E                  | F         | G       | H       | I           | J           | K           | L           | M             | N              | O        |  |
|----|--------|-----|-----|-----------|--------------------|-----------|---------|---------|-------------|-------------|-------------|-------------|---------------|----------------|----------|--|
| 1  | Number | TID | PID | x (pixel) | $\Delta x$ (pixel) | y (pixel) | t (sec) | l (val) | Len (pixel) | D2S (pixel) | D2R (pixel) | D2P (pixel) | v (pixel/sec) | $\alpha$ (deg) | Da (deg) |  |
| 2  | 1      | 1   | 1   | 738       | 26                 | 680       | 0       | 120     | 0           | 0           | NA          | NA          | NA            | NA             | NA       |  |
| 3  | 2      | 1   | 2   | 712       | 22                 | 684       | 0       | 92      | 26.306      | 26.306      | NA          | 26.306      | NA            | 171.254        | NA       |  |
| 4  | 3      | 1   | 3   | 690       | 30                 | 682       | 0       | 90      | 48.397      | 48.042      | NA          | 22.091      | NA            | -174.81        | 13.941   |  |
| 5  | 4      | 1   | 4   | 660       | 32                 | 682       | 0       | 99      | 78.397      | 78.026      | NA          | 30          | NA            | 180            | -5.194   |  |
| 6  | 5      | 1   | 5   | 628       |                    | 680       | 0       | 115     | 110.459     | 110         | NA          | 32.062      | NA            | -176.42        | 3.576    |  |
| 7  |        |     |     |           |                    |           |         |         |             |             |             |             |               |                |          |  |
| 8  |        |     |     |           |                    |           |         |         |             |             |             |             |               |                |          |  |
| 9  |        |     |     |           |                    |           |         |         |             |             |             |             |               |                |          |  |
| 10 |        |     |     |           |                    |           |         |         |             |             |             |             |               |                |          |  |
| 11 |        |     |     |           |                    |           |         |         |             |             |             |             |               |                |          |  |
| 12 |        |     |     |           |                    |           |         |         |             |             |             |             |               |                |          |  |

Only X position is used here for linear velocity calculation (since blood cell moving from left to right direction in our recorded videos)

- Calculate the  $\Delta x$  by substrate the  $x+1$  with  $x$  position
- Choose **five points** from the same blood cell for locomotion tracking
- Choose at least **4 independent blood cells** (with the highest velocity) for data duplicate
- Pick the cell with highest number of  $\Delta x$  to measure the **maximum blood flow distance**



# Select Region of Interest (ROI)

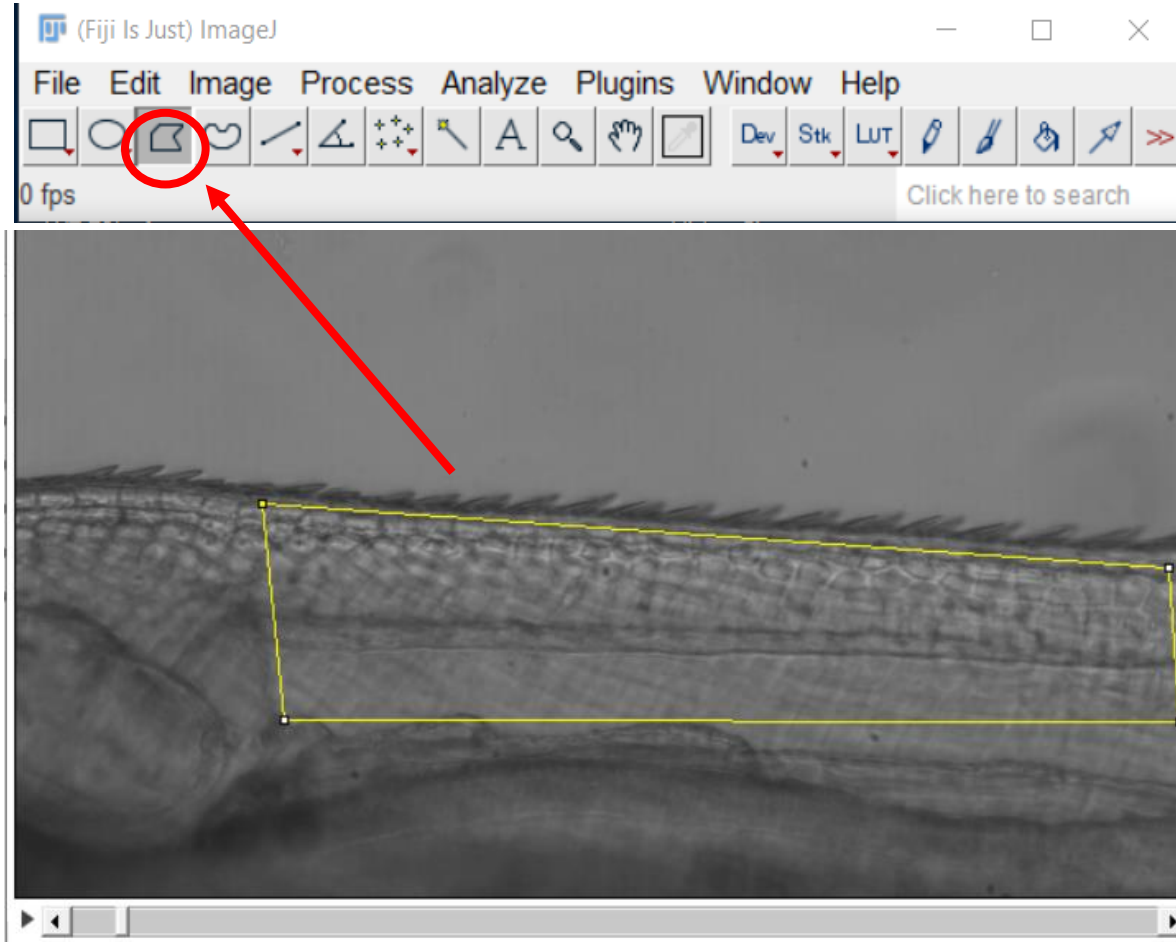

- Choose the polygon section and selections the region that are going to be analyzed (blood chamber)

# Clear outside to simplify the analysis complexity

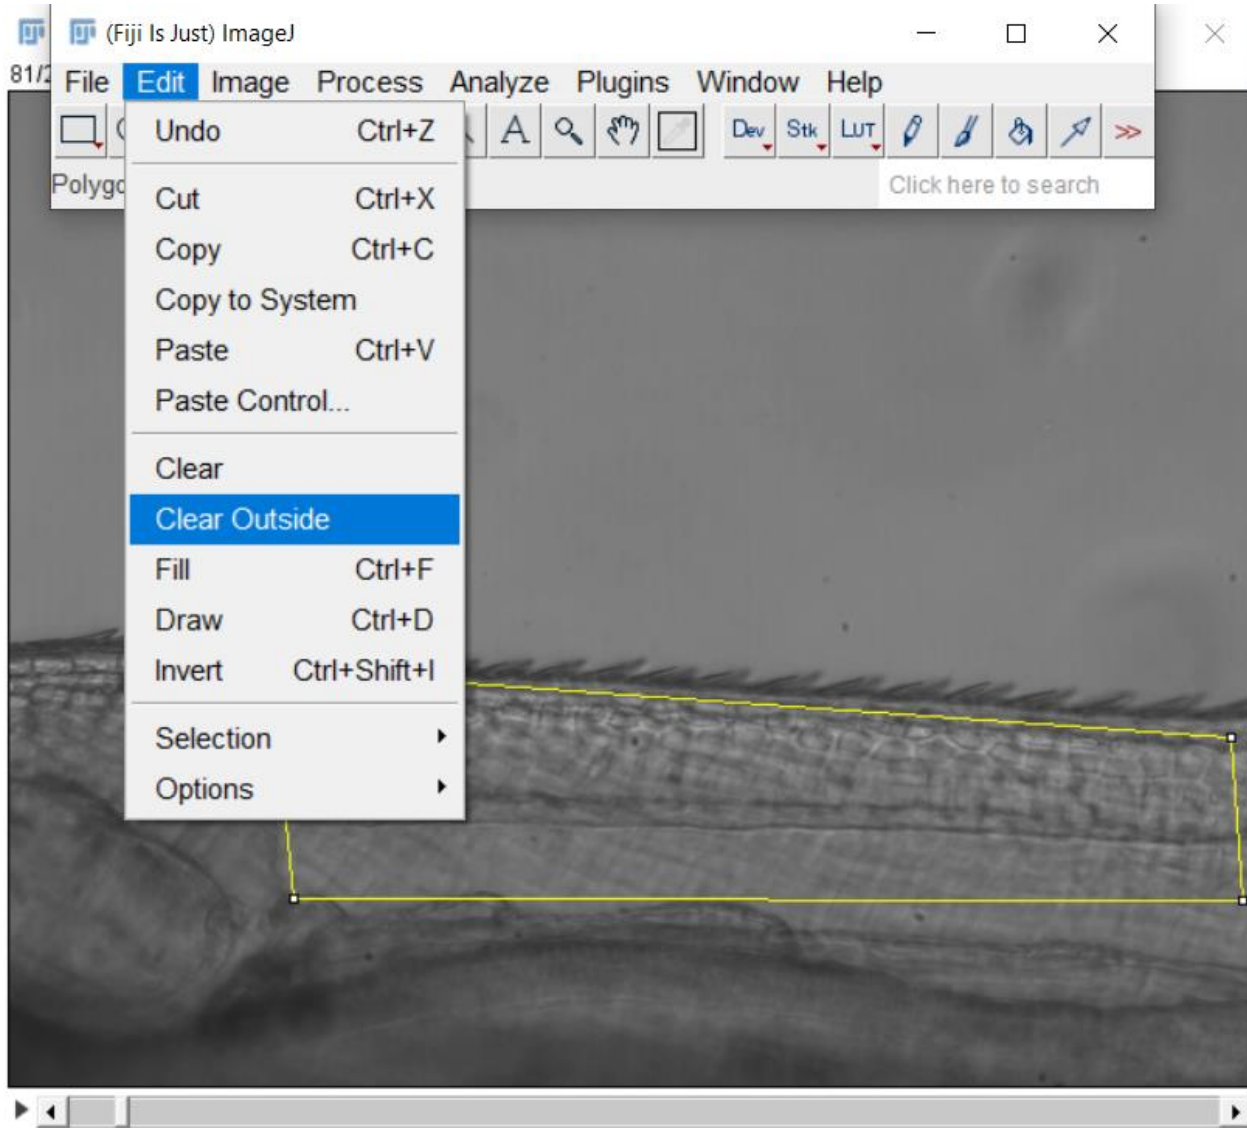

- Erase the area outside the current image selection ROI to ease the analysis

# Clear Outside Result

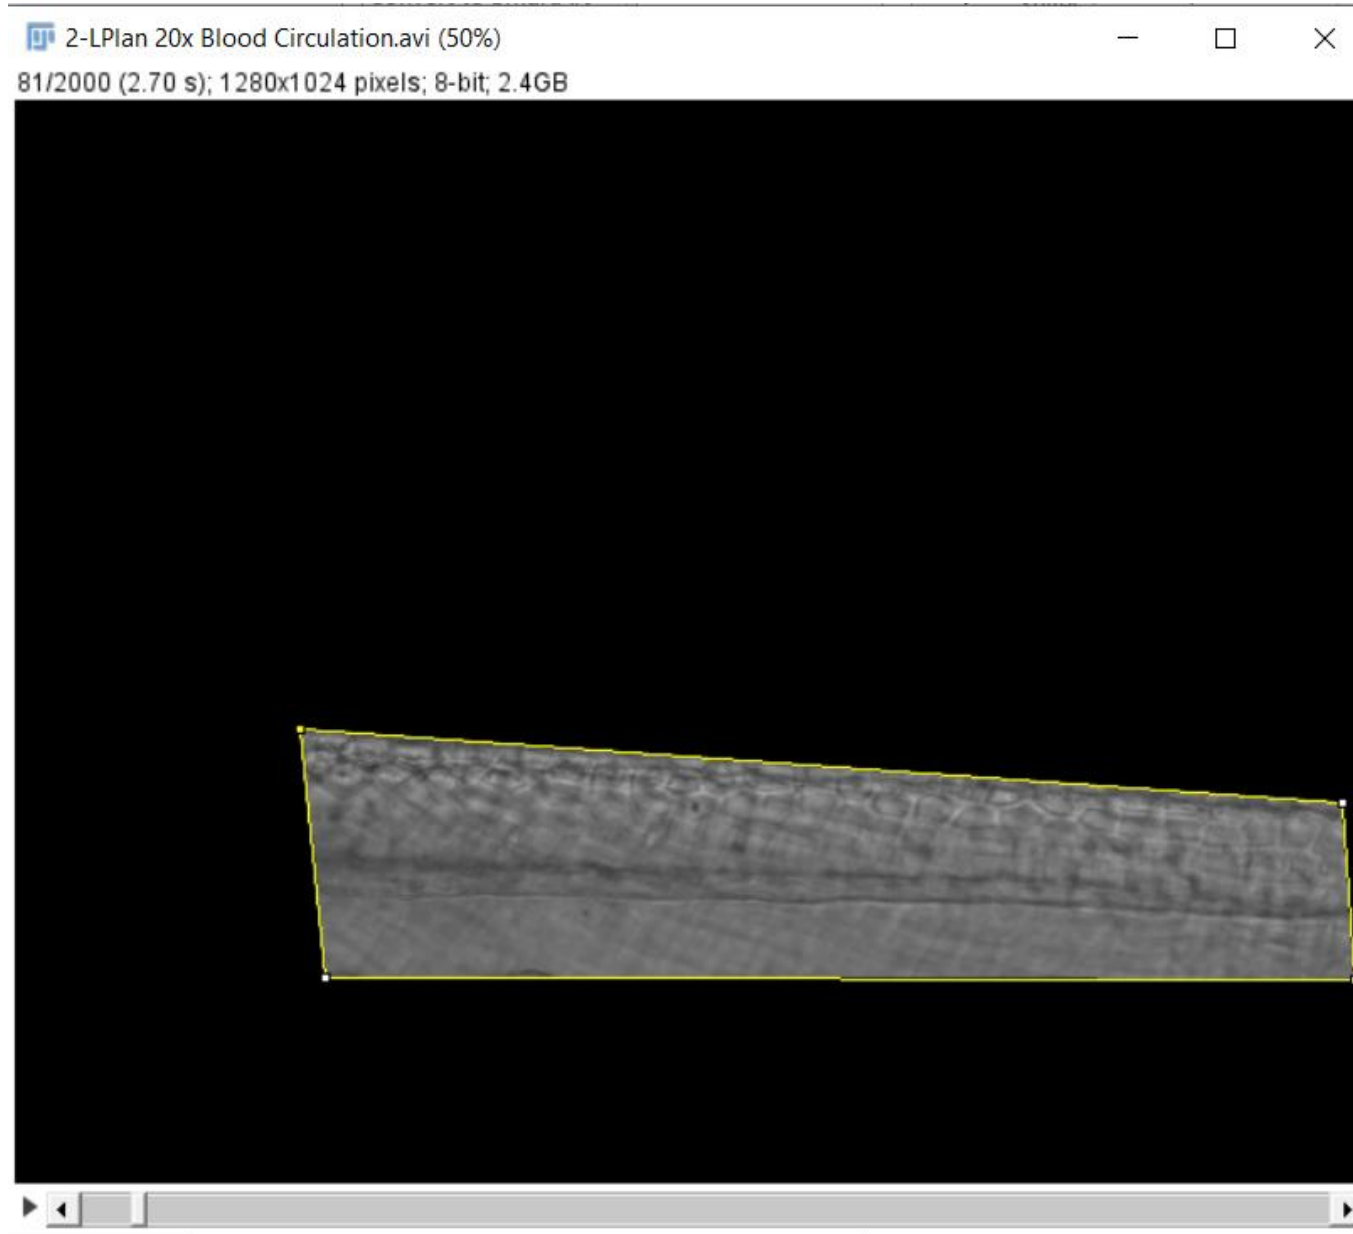

# Invert the Selected Area

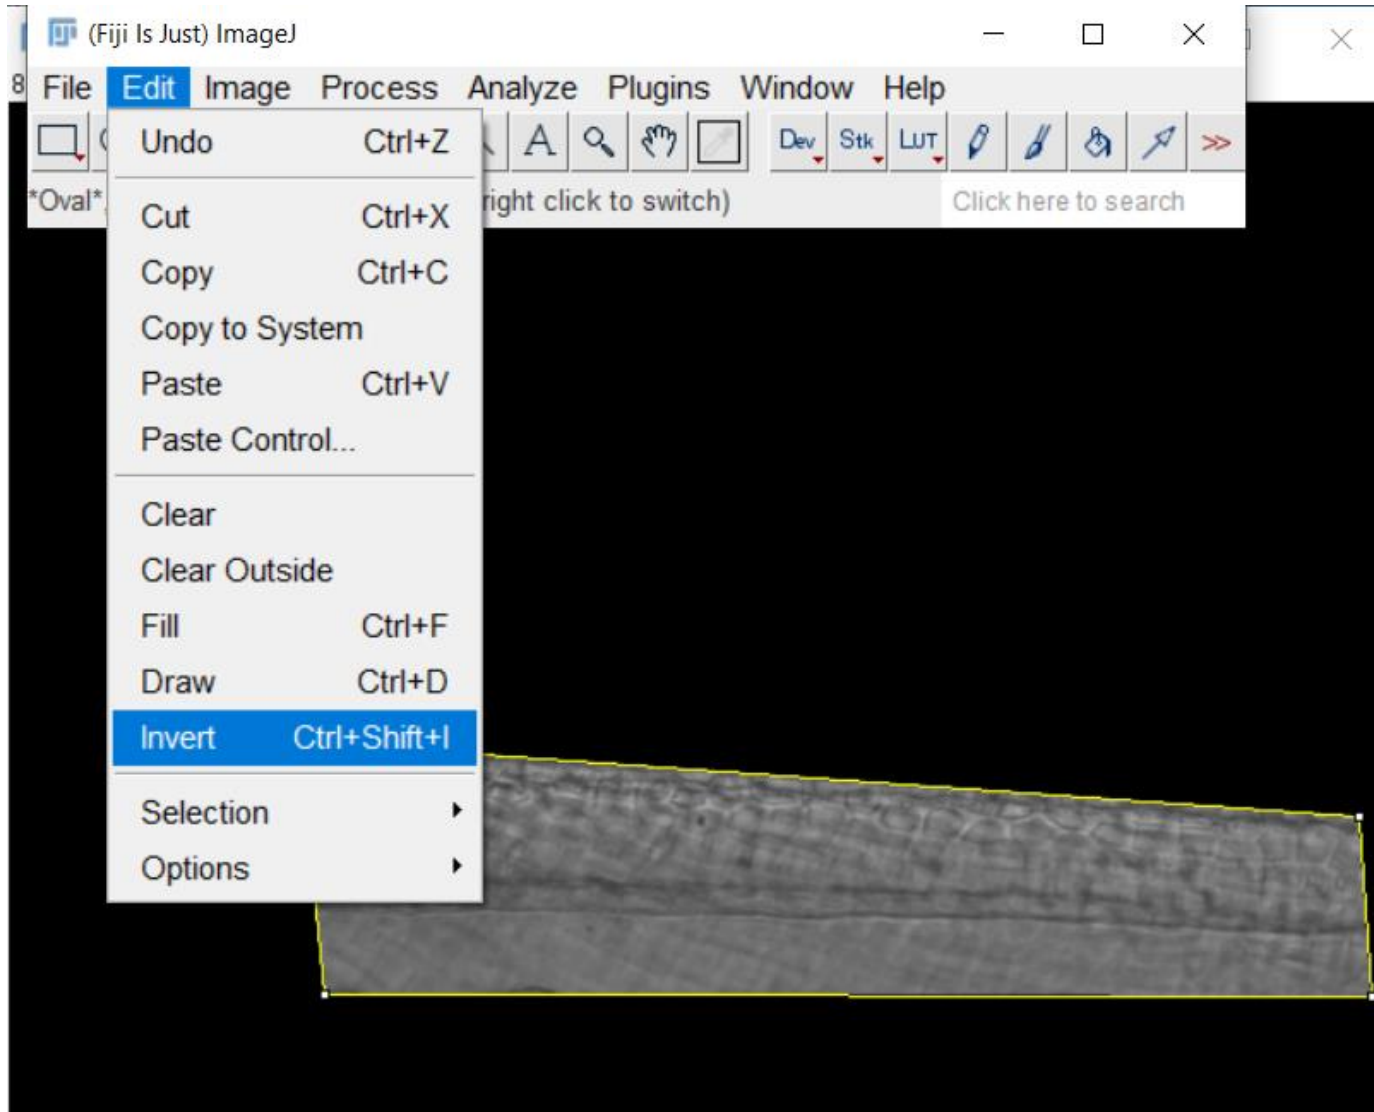

- Invert are used for creating a reversed image, similar to a photographic negative, of the entire image or selection

# Invert Result

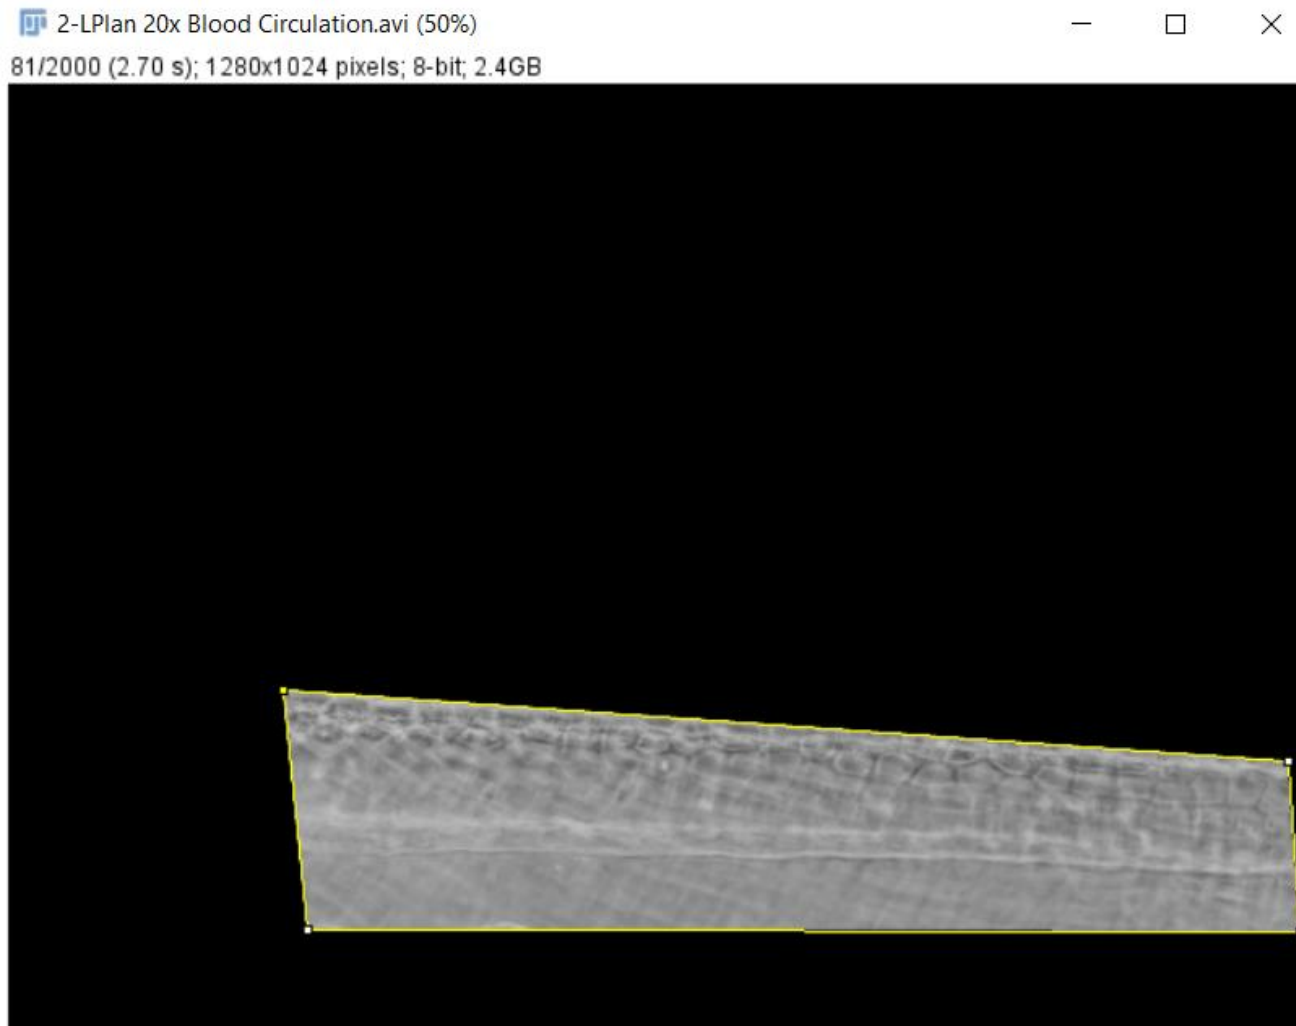

# Select Stack Differences

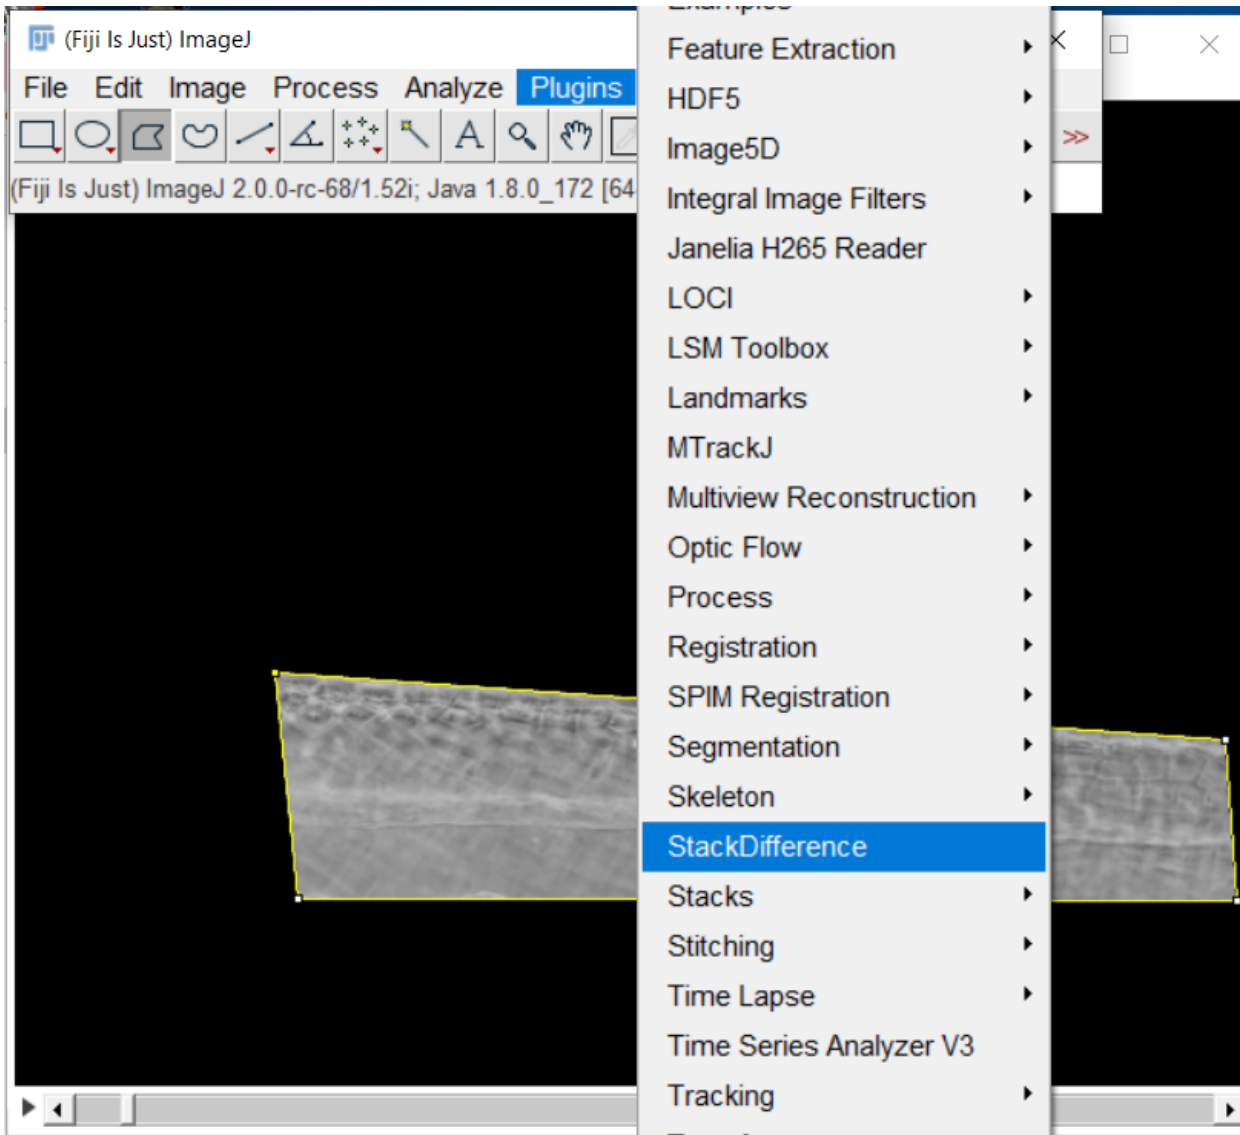

- Stack Differences are used to detect the dynamic pixel changes between different frames

Plugins -> Stack Difference



# Stack Difference Result

→ Trackmate

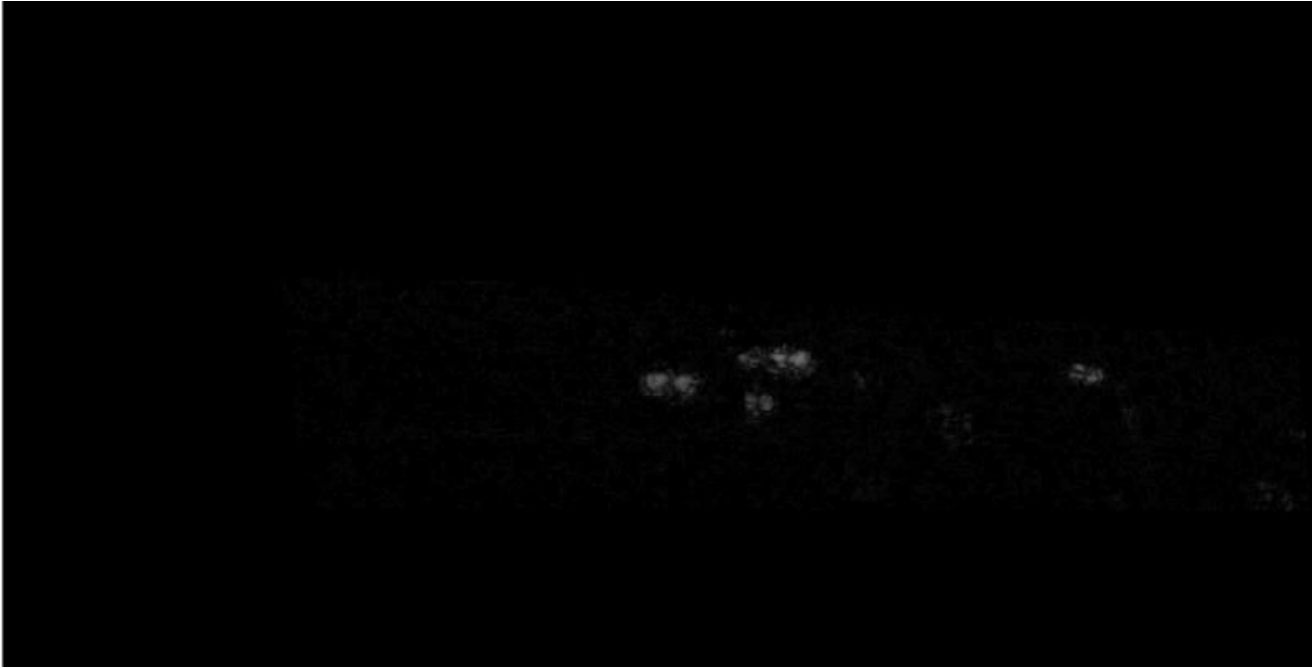

- Now the moving objects (blood cells) can be highlighted and the non-moving background can be ignored by using Stack difference plugin

TrackMate can deal with single particles, or spot-like objects. They are bright objects over a dark background for which the object contour shape is not important, but for which the main information can be extracted from the X,Y,Z coordinates over time

# Select Trackmate

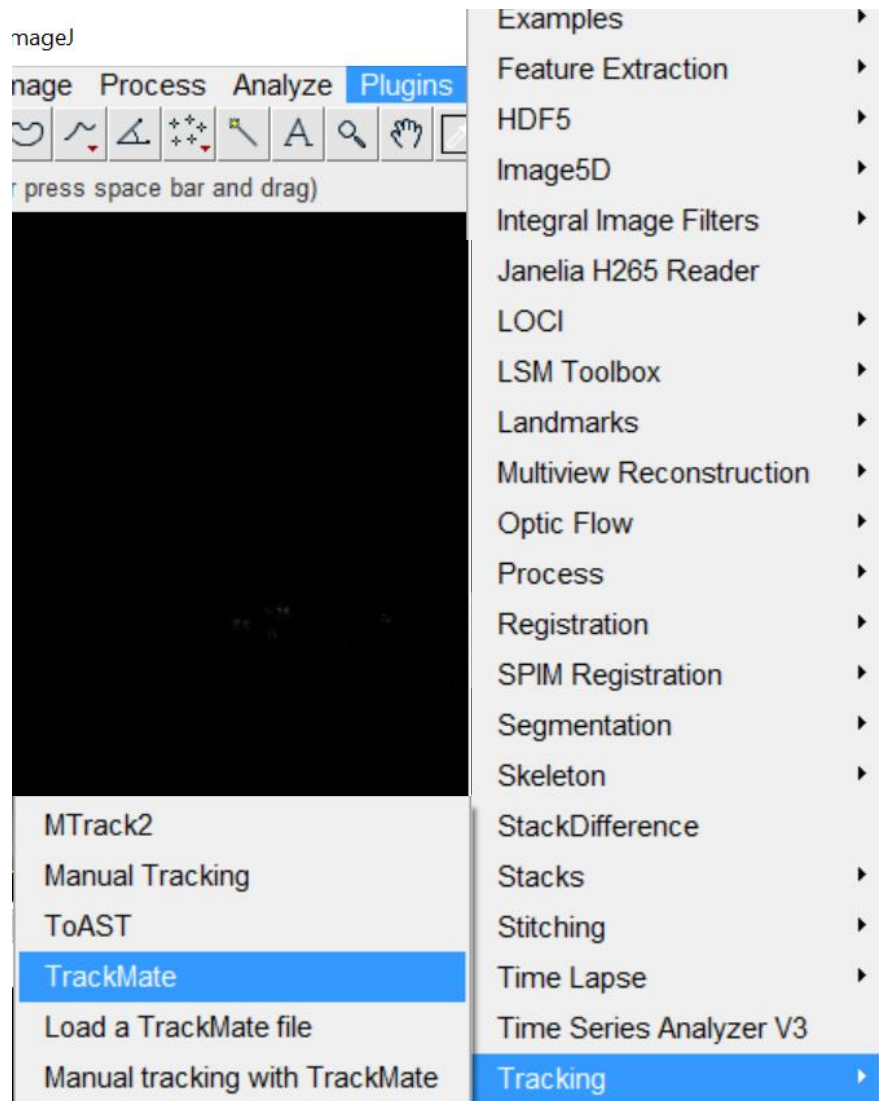

# Check Spatial and Temporal Calibration

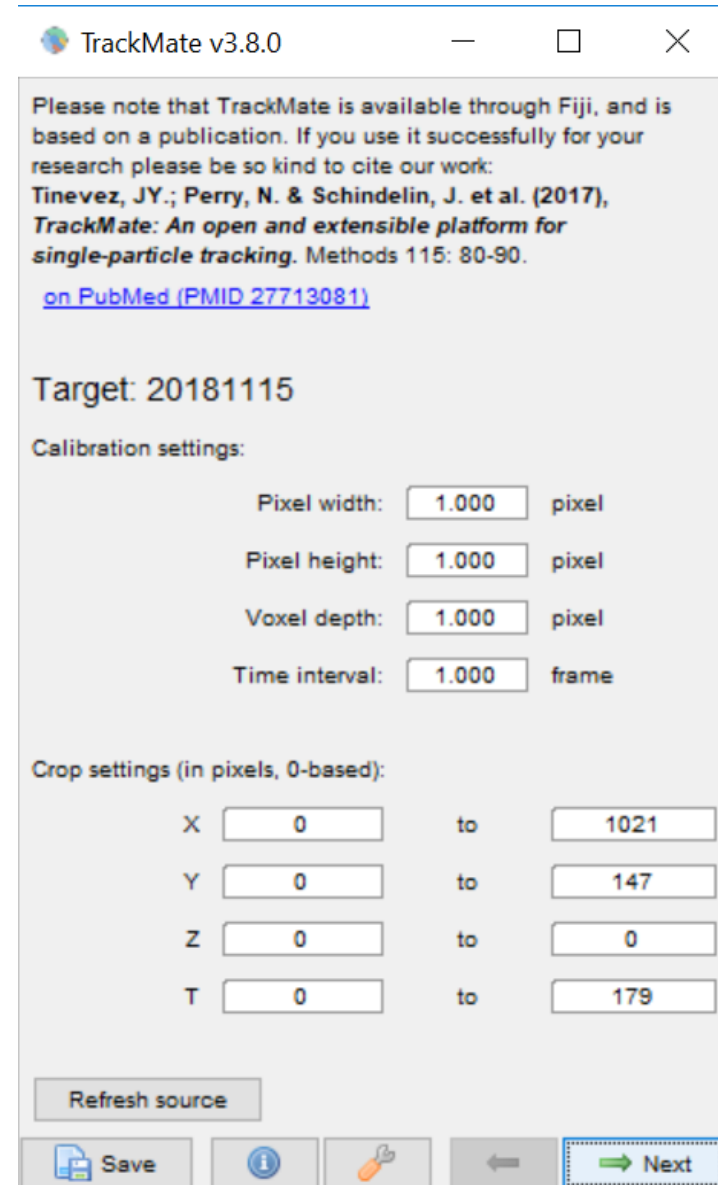

Plugins -> Tracking -> Trackmate

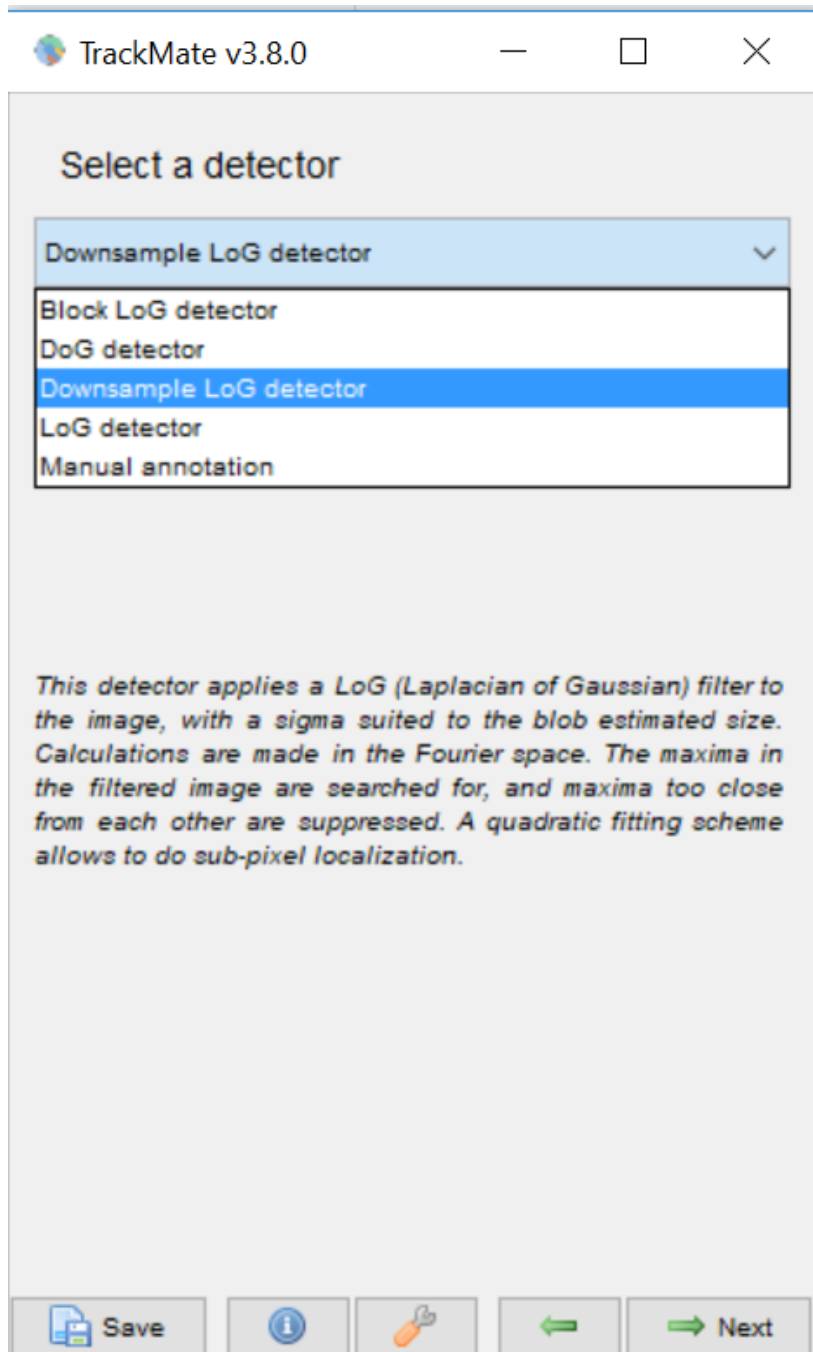

# Object Detector

- **LoG Detector** -> optimal for object sizes 5 to 20 pixels
- **Difference of Gaussian particle (DoG) Detector** -> optimal for object sizes below 5 pixels
- **Downsample LoG Detector** -> optimal for object sizes above 20 pixels

In this study, we choose  
**Downsample LoG detector**

# Adjusting Parameter

- Estimated blob diameter  
Enter approximate object size based on the measurement
- Threshold  
Helping dealing with gigantic number of spots
- Preview

In this study, we choose **50** for **estimated blob diameter**, and **0.15** for **threshold**

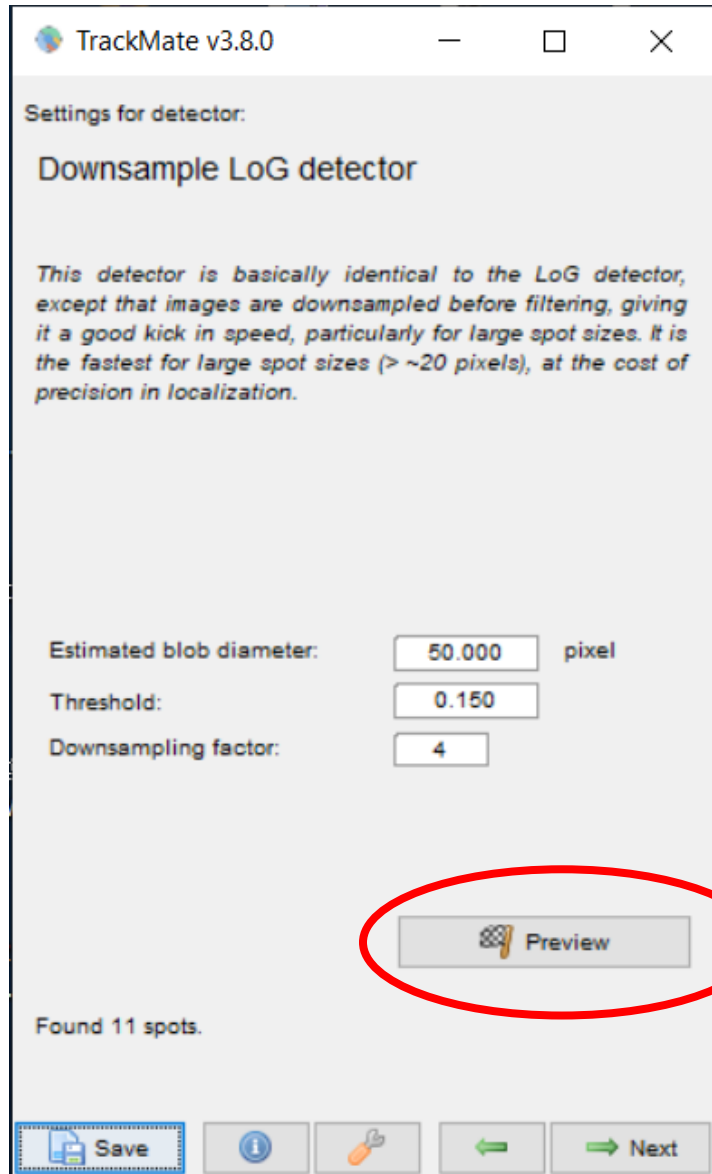

Preview Result

each of the blood cell will be detected

2

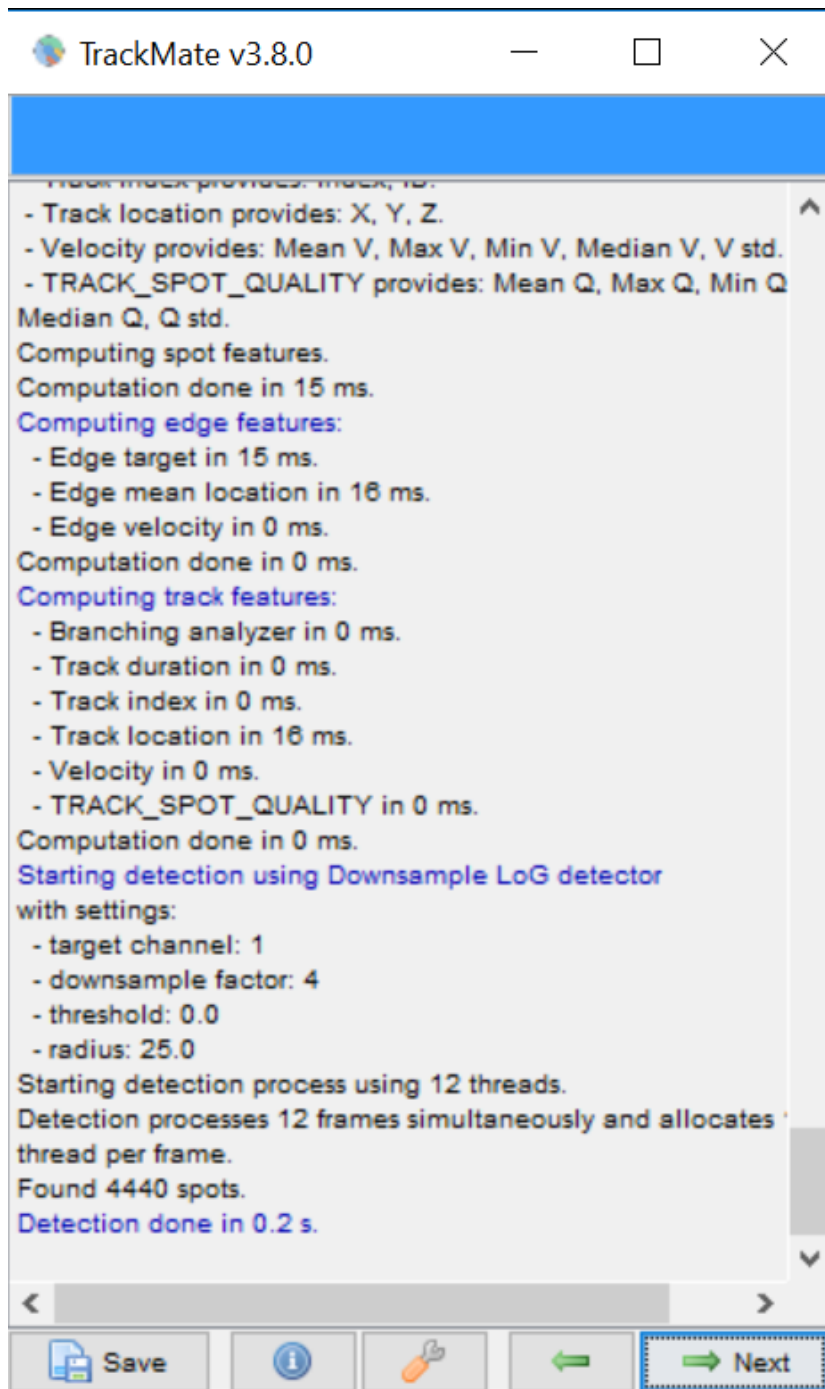

# Detection Process

TrackMate takes advantage of multi-core computers, which seems to be the standard nowadays. It will segment one time-frame per core available. On computers with many cores, the progress bar will seem to move in a bulky way: if you have 16 cores, 16 time-points will be segmented at once, and it is likely that they will be finished approximately on the same time. So don't be worried if the progress bar does not move in the beginning for large images.

2

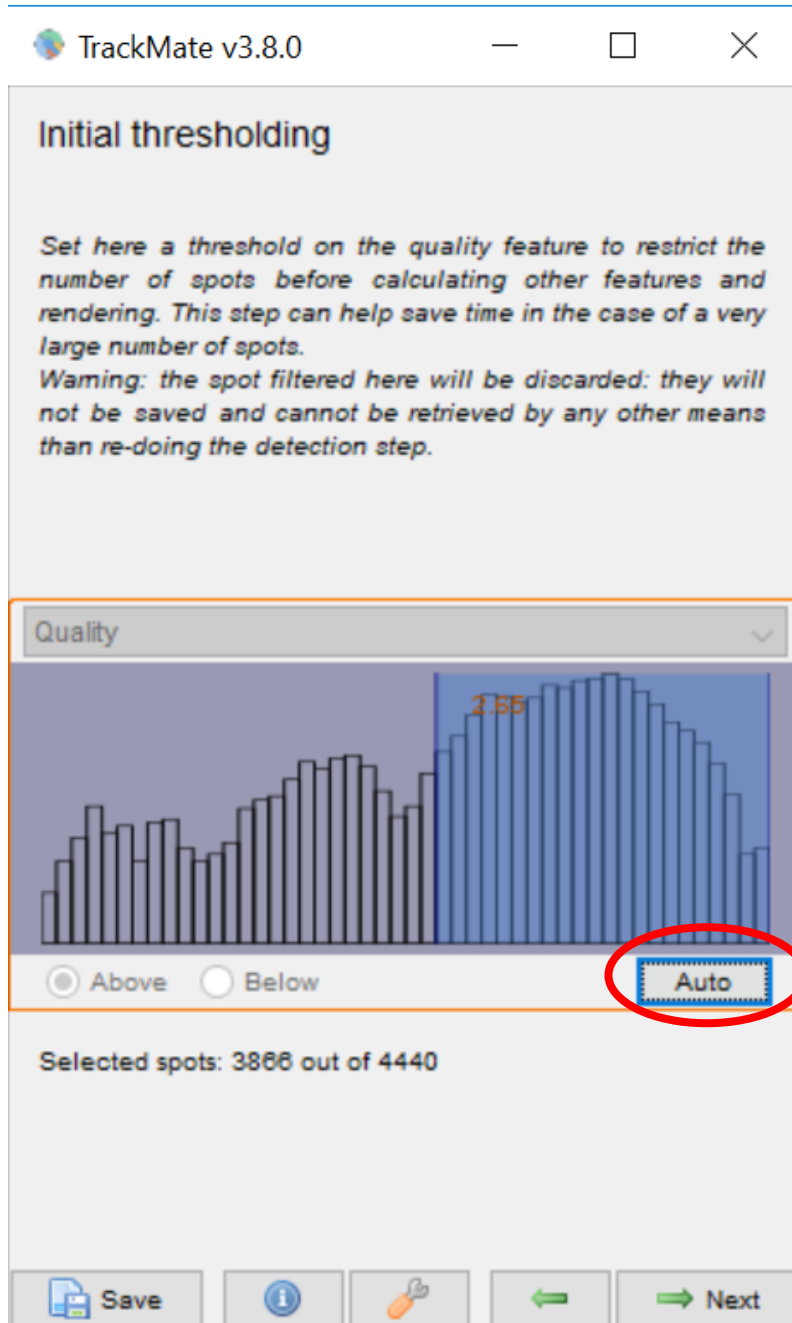

# Initial Object Filtering

- One of the filter that set by the **segmenter** and arbitrary measure, object with certain value will be discarded if not met the criteria

Choose  
Auto



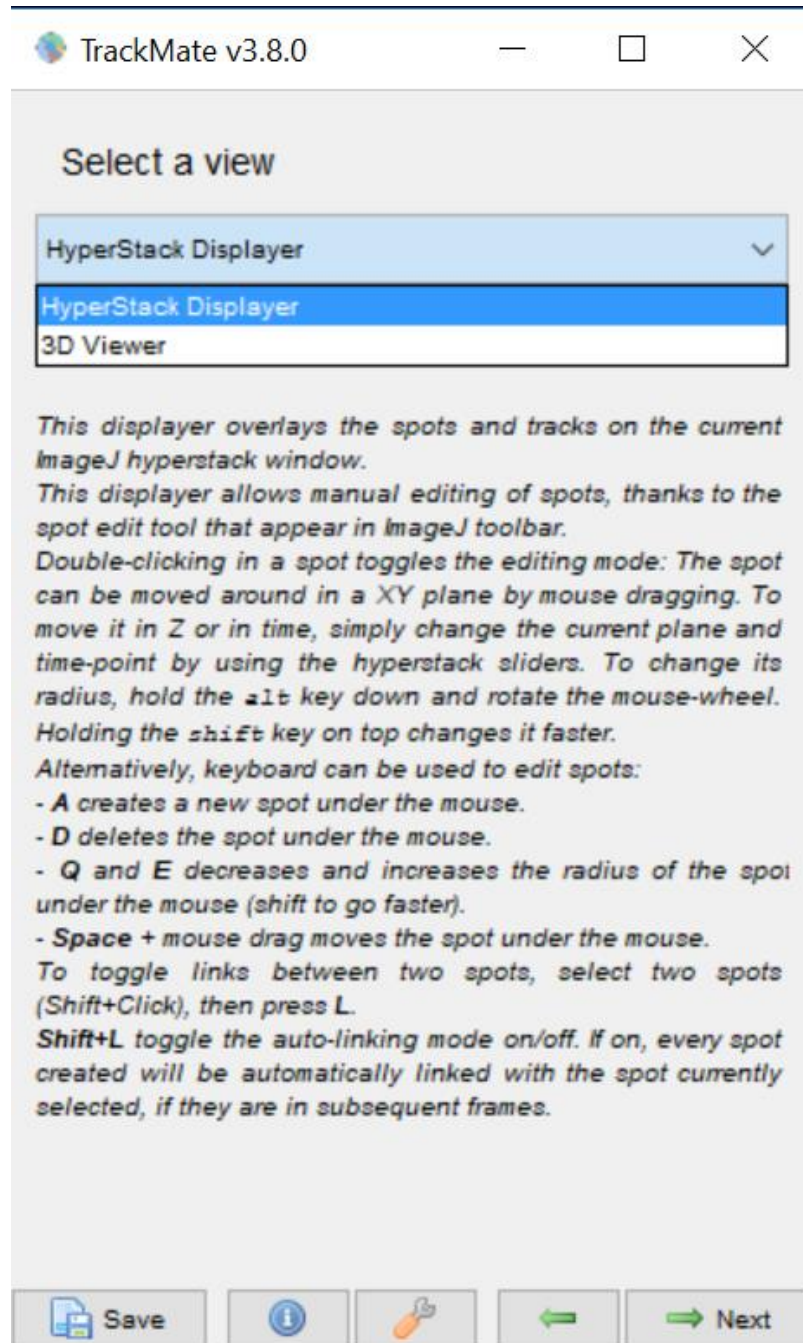

## Selecting a View

- Hyperstack Displayer simply reuses ImageJ stack window and overlay the results non-destructively over image
- 3D viewer to calculate in 3D, in very complicated case

In this study, we choose  
**Hyperstack Displayer**

2

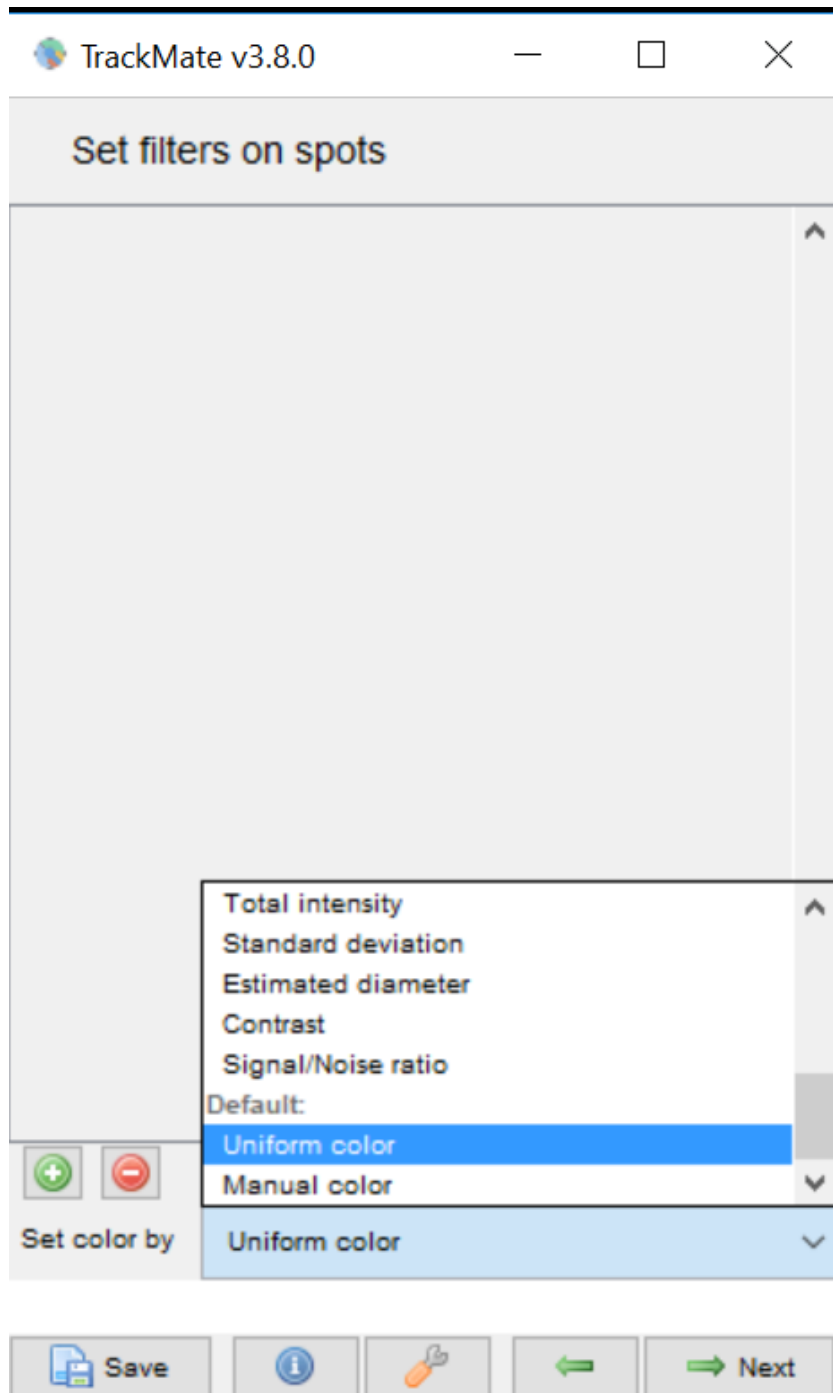

# Object Filtering

- One of the filter feature to distinguish the object from noise
- Uniform color: based on the object color
- Estimated diameter: based on the size of the object

In this study, we choose  
**Uniform color**

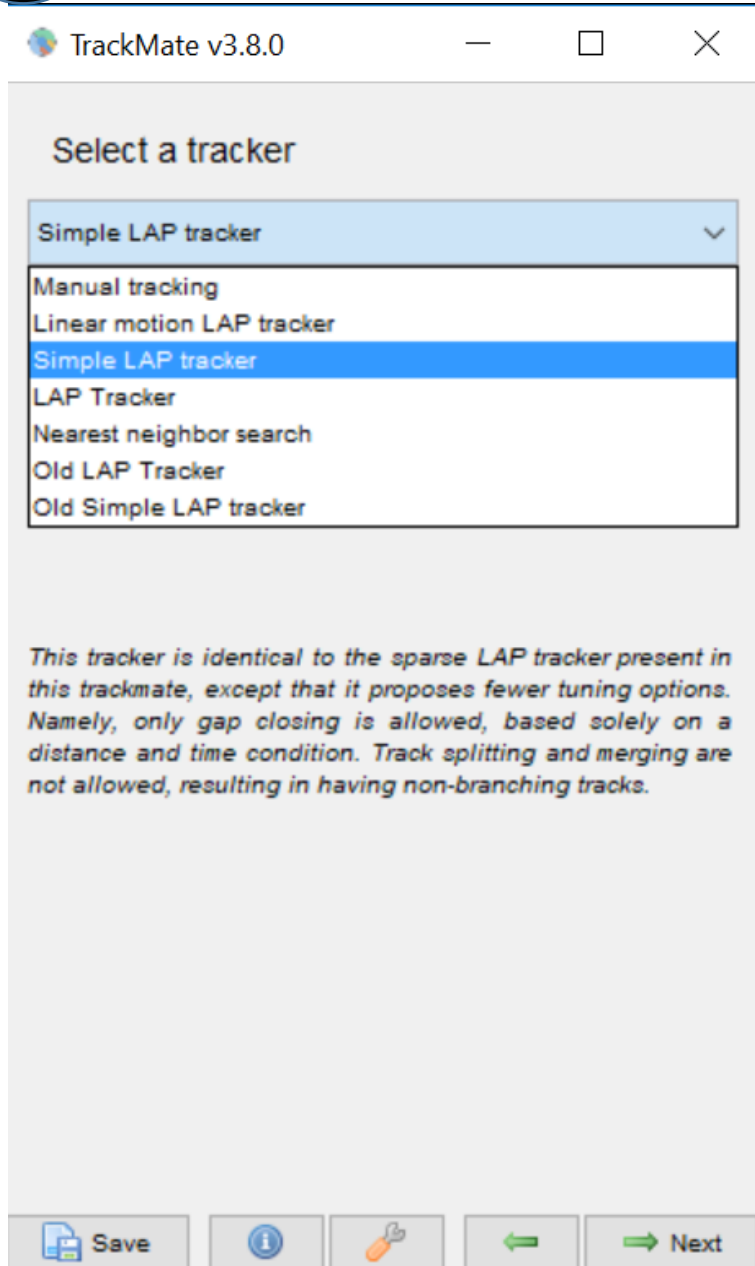

- Linear Assignment Problem (LAP)
- Simple LAP tracker
  - > Simplified version that has less settings, suitable for particle that did not merge nor divide
- Nearest neighbor search
  - > Each object in the frame is linked to another frame regardless of another object, work only with the most optimum one

In this study, we choose  
**simple LAP tracker**

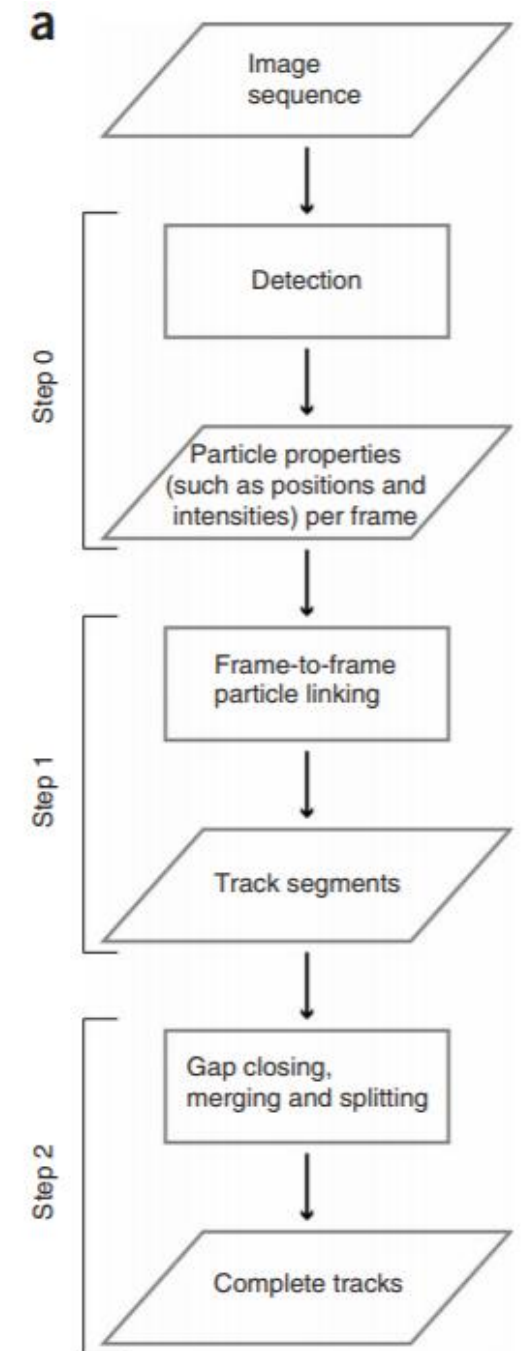

2

TrackMate v3.8.0

Settings for tracker:

### Simple LAP tracker

*This tracker is identical to the sparse LAP tracker present in this trackmate, except that it proposes fewer tuning options. Namely, only gap closing is allowed, based solely on a distance and time condition. Track splitting and merging are not allowed, resulting in having non-branching tracks.*

Linking max distance:  pixel

Gap-closing max distance:  pixel

Gap-closing max frame gap:

 Save     Next

Filled with the  
max distance  
which measured  
by MTrackJ

- Linking max distance  
-> Maximum pixel of the object between two frames that allowed as the linking distance
- Gap-closing max frame gap  
-> Object would be detected if distance in the first frame is not greater than the next frame
- Gap-closing max frame gap  
-> Set maximal time interval between two objects to be detected

2

# Tracking Process

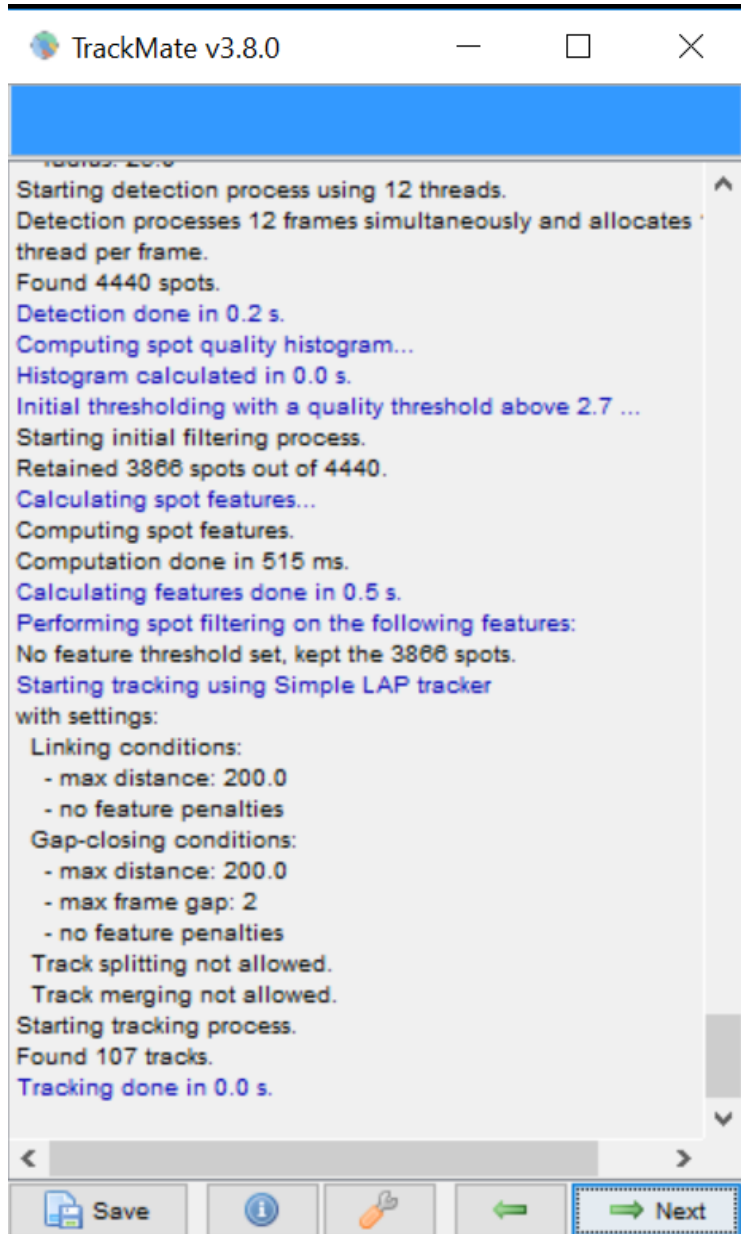

## Set Filter on Tracks

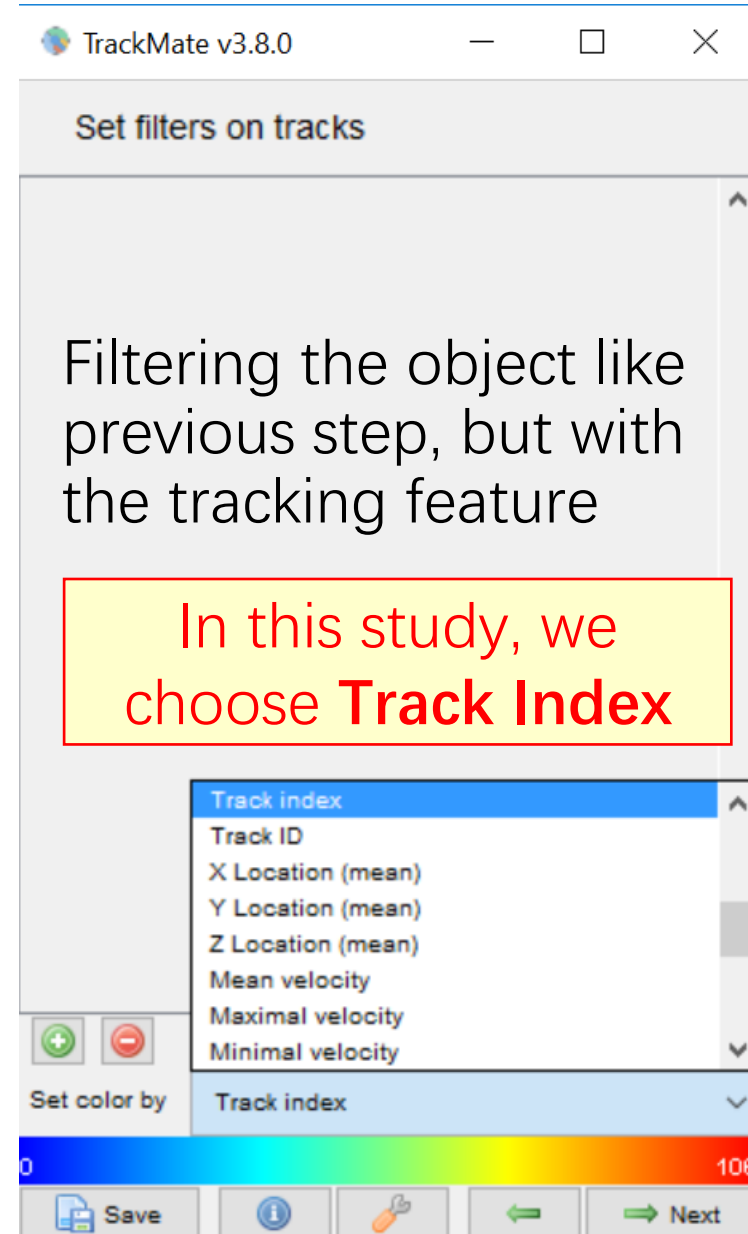

2

# Select the Output Type

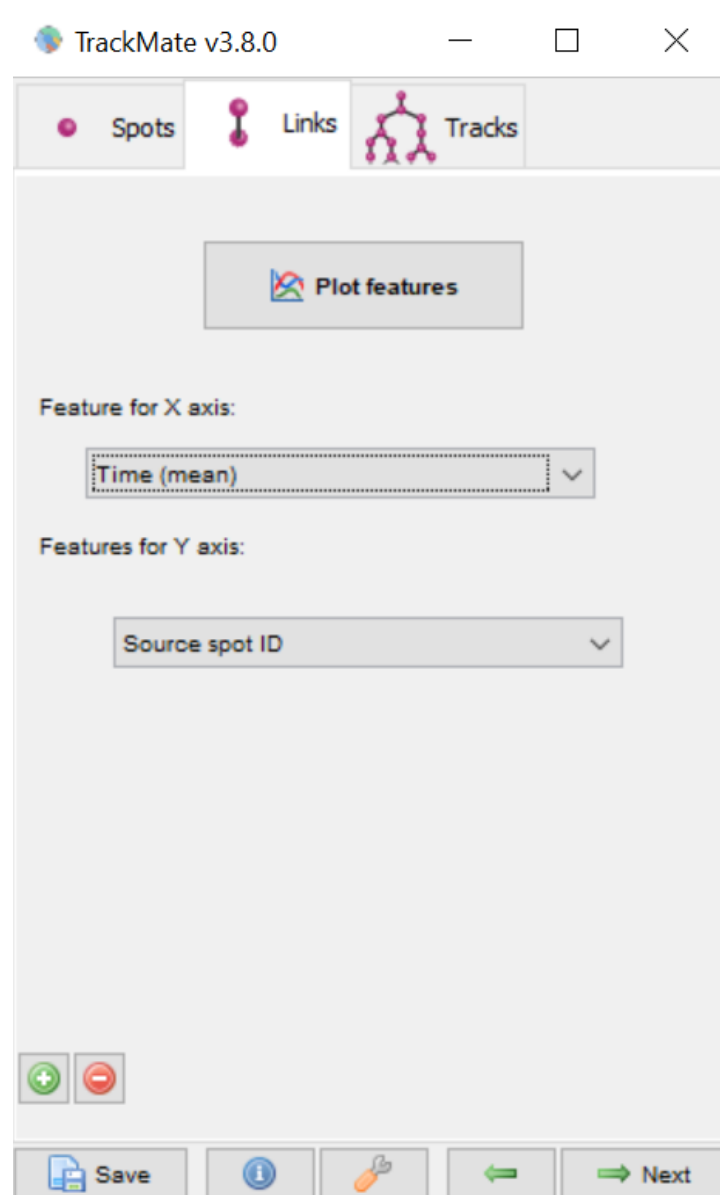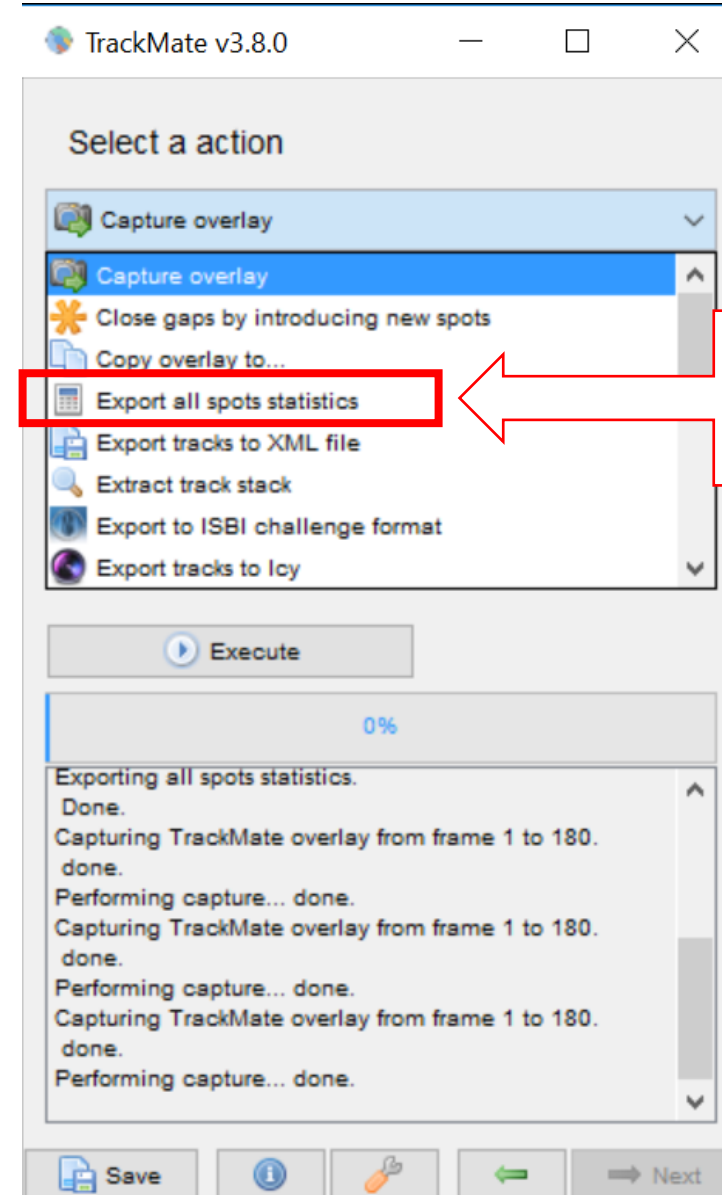

Choose export all spots statistics to get the raw data



| Label | ID  | TRACK_ID | QUALITY | POSITION_X | POSITION_Y | POSITION_Z | POSITION_T | FRAME | RADIUS | VISIBILITY | MANUAL_COLOR | MEAN_INTENSITY | MEDIAN_INTENSITY |
|-------|-----|----------|---------|------------|------------|------------|------------|-------|--------|------------|--------------|----------------|------------------|
| ID112 | 112 | 0        | 3.185   | 332        | 52         | 0          | 0          | 0     | 25     | 1          | -10921639    | 115.399        | 119              |
| ID104 | 104 | 1        | 3.291   | 532        | 40         | 0          | 0          | 0     | 25     | 1          | -10921639    | 108.836        | 111              |
| ID106 | 106 | None     | 2.657   | 196        | 44         | 0          | 0          | 0     | 25     | 1          | -10921639    | 98.600         | 99               |
| ID107 | 107 | 2        | 3.514   | 448        | 44         | 0          | 0          | 0     | 25     | 1          | -10921639    | 114.424        | 123              |
| ID108 | 108 | 3        | 3.037   | 864        | 44         | 0          | 0          | 0     | 25     | 1          | -10921639    | 117.477        | 119              |
| ID109 | 109 | 4        | 3.606   | 412        | 48         | 0          | 0          | 0     | 25     | 1          | -10921639    | 117.248        | 123              |
| ID111 | 111 | 5        | 3.605   | 96         | 52         | 0          | 0          | 0     | 25     | 1          | -10921639    | 104.836        | 107              |
| ID232 | 232 | 1        | 3.196   | 536        | 44         | 0          | 1          | 1     | 25     | 1          | -10921639    | 114.559        | 111              |
| ID233 | 233 | 3        | 2.957   | 872        | 44         | 0          | 1          | 1     | 25     | 1          | -10921639    | 117.175        | 118              |
| ID236 | 236 | 4        | 3.660   | 424        | 48         | 0          | 1          | 1     | 25     | 1          | -10921639    | 118.972        | 124              |
| ID238 | 238 | 5        | 3.494   | 100        | 52         | 0          | 1          | 1     | 25     | 1          | -10921639    | 104.622        | 107              |
| ID231 | 231 | 2        | 3.404   | 472        | 44         | 0          | 1          | 1     | 25     | 1          | -10921639    | 114.766        | 121              |
| ID239 | 239 | 0        | 3.045   | 332        | 52         | 0          | 1          | 1     | 25     | 1          | -10921639    | 114.286        | 118              |
| ID81  | 81  | 3        | 3.193   | 876        | 40         | 0          | 2          | 2     | 25     | 1          | -10921639    | 116.542        | 118              |
| ID82  | 82  | 6        | 2.684   | 224        | 44         | 0          | 2          | 2     | 25     | 1          | -10921639    | 101.080        | 104              |
| ID83  | 83  | 2        | 3.836   | 428        | 44         | 0          | 2          | 2     | 25     | 1          | -10921639    | 114.506        | 124              |
| ID84  | 84  | 7        | 2.737   | 176        | 48         | 0          | 2          | 2     | 25     | 1          | -10921639    | 101.690        | 103              |
| ID85  | 85  | 0        | 2.737   | 280        | 48         | 0          | 2          | 2     | 25     | 1          | -10921639    | 107.899        | 110              |
| ID88  | 88  | 5        | 3.622   | 104        | 52         | 0          | 2          | 2     | 25     | 1          | -10921639    | 105.211        | 106              |
| ID89  | 89  | 4        | 3.176   | 340        | 52         | 0          | 2          | 2     | 25     | 1          | -10921639    | 115.724        | 119              |
| ID79  | 79  | 1        | 3.298   | 548        | 40         | 0          | 2          | 2     | 25     | 1          | -10921639    | 110.760        | 112              |
| ID324 | 324 | 1        | 3.263   | 556        | 40         | 0          | 3          | 3     | 25     | 1          | -10921639    | 112.419        | 113              |
| ID326 | 326 | 3        | 3.226   | 884        | 40         | 0          | 3          | 3     | 25     | 1          | -10921639    | 117.547        | 119              |
| ID327 | 327 | 2        | 3.957   | 436        | 44         | 0          | 3          | 3     | 25     | 1          | -10921639    | 116.138        | 125              |
| ID329 | 329 | 7        | 2.873   | 176        | 48         | 0          | 3          | 3     | 25     | 1          | -10921639    | 102.541        | 103              |
| ID330 | 330 | 6        | 2.791   | 240        | 48         | 0          | 3          | 3     | 25     | 1          | -10921639    | 105.401        | 107              |
| ID331 | 331 | 0        | 2.755   | 284        | 48         | 0          | 3          | 3     | 25     | 1          | -10921639    | 108.595        | 111              |
| ID332 | 332 | 4        | 3.185   | 336        | 48         | 0          | 3          | 3     | 25     | 1          | -10921639    | 110.217        | 117              |
| ID334 | 334 | 5        | 2.596   | 188        | 52         | 0          | 3          | 3     | 25     | 1          | -10921639    | 105.417        | 106              |

# Copy the Raw Data into Excel

|    | A        | B       | C   | D   | E     | F |
|----|----------|---------|-----|-----|-------|---|
| 1  | Label    | TrackID | X   | Y   | Frame |   |
| 2  | ID269900 | 0       | 532 | 76  | 0     |   |
| 3  | ID269972 | 0       | 540 | 76  | 1     |   |
| 4  | ID269929 | 0       | 556 | 80  | 2     |   |
| 5  | ID270135 | 0       | 572 | 80  | 3     |   |
| 6  | ID270014 | 0       | 584 | 80  | 4     |   |
| 7  | ID270077 | 0       | 592 | 80  | 5     |   |
| 8  | ID270046 | 0       | 596 | 80  | 6     |   |
| 9  | ID269956 | 0       | 604 | 84  | 7     |   |
| 10 | ID270190 | 0       | 612 | 84  | 8     |   |
| 11 | ID270163 | 0       | 632 | 84  | 9     |   |
| 12 | ID269909 | 1       | 28  | 120 | 0     |   |
| 13 | ID269988 | 1       | 32  | 120 | 1     |   |
| 14 | ID269935 | 1       | 40  | 120 | 2     |   |
| 15 | ID270141 | 1       | 44  | 120 | 3     |   |
| 16 | ID270024 | 1       | 56  | 120 | 4     |   |
| 17 | ID270086 | 1       | 64  | 120 | 5     |   |
| 18 | ID270054 | 1       | 76  | 124 | 6     |   |
| 19 | ID269968 | 1       | 84  | 124 | 7     |   |
| 20 | ID270196 | 1       | 80  | 124 | 8     |   |
| 21 | ID270169 | 1       | 144 | 124 | 9     |   |
| 22 | ID270227 | 1       | 140 | 124 | 10    |   |

◀ ▶ Sheet1 Sheet2 Sheet3 (+)

A. Label

Show each detected tracking point ID

**B. TrackID**

Show each detected tracking point ID based on the same object

C. X

Show X position of the object in pixel

D. Y

Show Y position of the object in pixel

E. Frame

Show each detected tracking point frame number

2

Individual  
blood cell ID

# Data Analysis

|    | A        | B       | C   | D     | E   | F     | G          | H        | I           | J          | K | L        | M          | N         | O         | P        | Q       |
|----|----------|---------|-----|-------|-----|-------|------------|----------|-------------|------------|---|----------|------------|-----------|-----------|----------|---------|
| 1  | Label    | TrackID | X   | X2-X1 | Y   | Y2-Y1 | Distance ( | 0        | Total Indiv | Average Ir | 0 |          | Average Ir | Average I | Average S | MIN      | MAX     |
| 2  | ID269900 | 0       | 532 | 8     | 76  | 0     | 8          | 8        | 0           | 0          | 1 | nan      | 10.14367   | 1.73693   | 312.6473  | 30.82192 | 1439.09 |
| 3  | ID269972 | 0       | 540 | 16    | 76  | 4     | 16.49242   | 24.49242 | 0           | 0          | 2 | nan      | 7.11608    | 1.218507  | 219.3312  |          |         |
| 4  | ID269929 | 0       | 556 | 16    | 80  | 0     | 16         | 40.49242 | 0           | 0          | 3 | nan      | 3.763939   | 0.64451   | 116.0118  |          |         |
| 5  | ID270135 | 0       | 572 | 12    | 80  | 0     | 12         | 52.49242 | 0           | 0          | 4 | nan      | 6.094427   | 1.043566  | 187.8419  |          |         |
| 6  | ID270014 | 0       | 584 | 8     | 80  | 0     | 8          | 60.49242 | 0           | 0          | 5 | nan      | 9.670738   | 1.655948  | 298.0707  |          |         |
| 7  | ID270077 | 0       | 592 | 4     | 80  | 0     | 4          | 64.49242 | 0           | 0          | 6 | nan      | 8          | 1.369863  | 246.5753  |          |         |
| 8  | ID270046 | 0       | 596 | 8     | 80  | 4     | 8.944272   | 73.43669 | 0           | 0          | 7 | nan      | 8.912316   | 1.526082  | 274.6947  |          |         |
| 9  | ID269956 | 0       | 604 | 8     | 84  | 0     | 8          | 81.43669 | 0           | 0          | 8 | nan      | 9.129362   | 1.563247  | 281.3844  |          |         |
| 10 | ID270190 | 0       | 612 | 20    | 84  | 0     | 20         | 101.4367 | 0           | 0          | 9 | nan      | 12.17984   | 2.085588  | 375.4059  |          |         |
| 11 | ID270163 | 0       | 632 | nan   | 84  | nan   | nan        | 0        | 101.4367    | 10.14367   | 0 | 10.14367 | 6.157379   | 1.054346  | 189.7822  |          |         |
| 12 | ID269909 | 1       | 28  | 4     | 120 | 0     | 4          | 4        | 0           | 0          | 1 | nan      | 9.029157   | 1.546088  | 278.2959  |          |         |

D. **X2-X1** -> subtraction of the next and previous time point of X axis

F. **Y2-Y1** -> subtraction of the next and previous time point of Y axis

G. **Distance (pixel)** ->  $\sqrt{(X2 - X1)^2 + (Y2 - Y1)^2}$

I. Total Individual Distance (pixel) -> summary of each individual distance

J. Average Individual Distance (pixel) -> summary of each individual distance divided by detected track number

N. Average Individual Distance ( $\mu\text{m}$ ) -> conversion from pixel into  $\mu\text{m}$  by scale

O. **Average Speed ( $\mu\text{m}/\text{sec}$ )** -> average individual distance ( $\mu\text{m}$ ) multiply by recording speed (in this case 200fps)

**High speed Video  
recording**

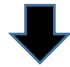

**Blood flow velocity  
calculation**

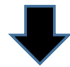

**Heartbeat  
calculation**

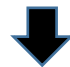

**Cardiac function  
assessment**

**Heartbeat rate  
(HR)**

**SFFT**

**Poincare plot**

**Stroke volume  
(SV)**

**Fractional  
Shortening (FS)**

**Cardiac output  
(CO)**

**Ejection Fraction  
(EF)**

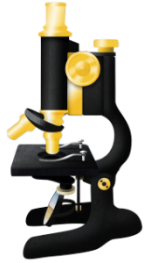

# Open the Video File with ImageJ

- Click File + Open to Select Video File
- Select the VirtualDub converted video
- In AVI Reader of ImageJ, choose the frames selected and check Use Virtual Stack

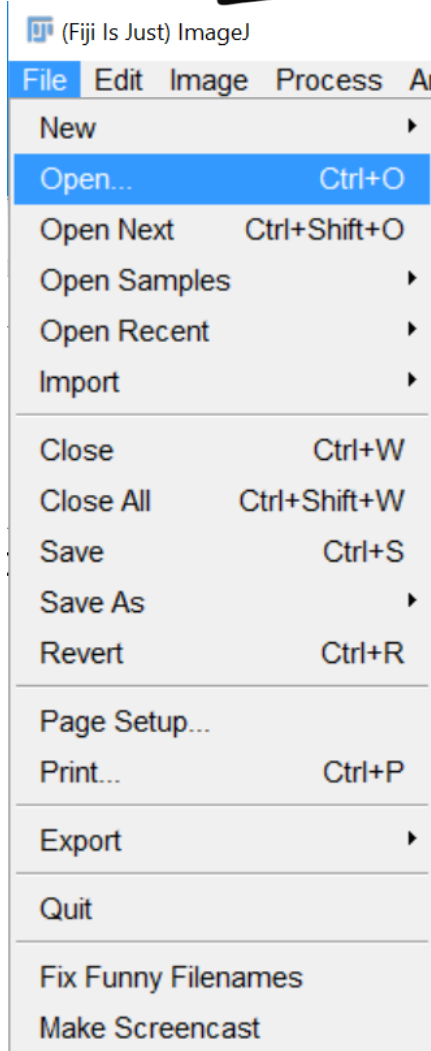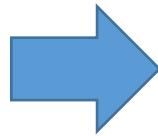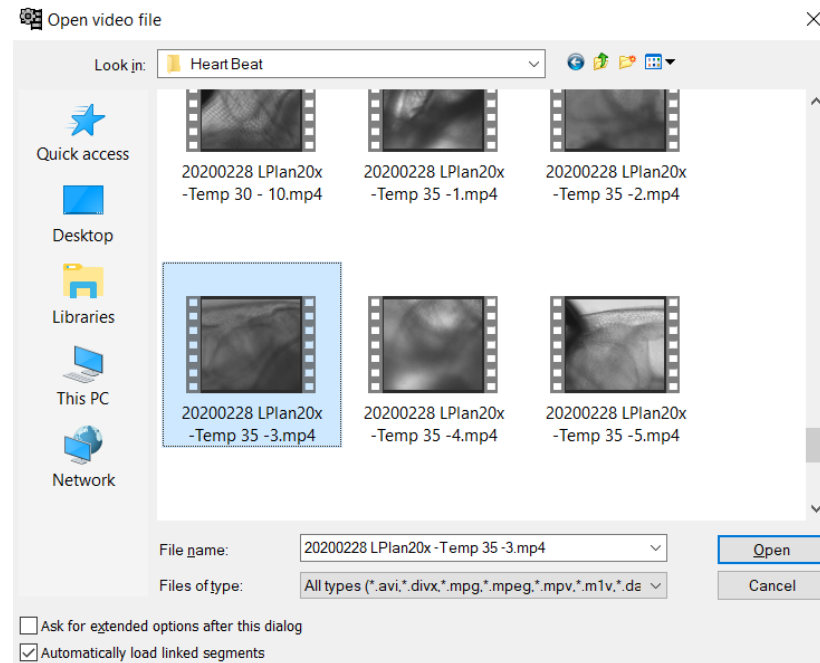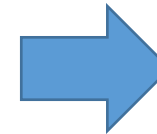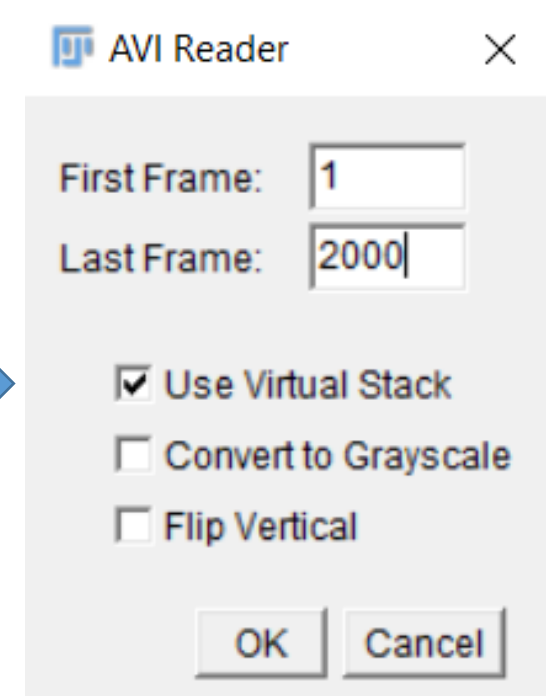

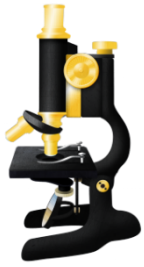

# Select Region of Interesting (ROI) in ImageJ

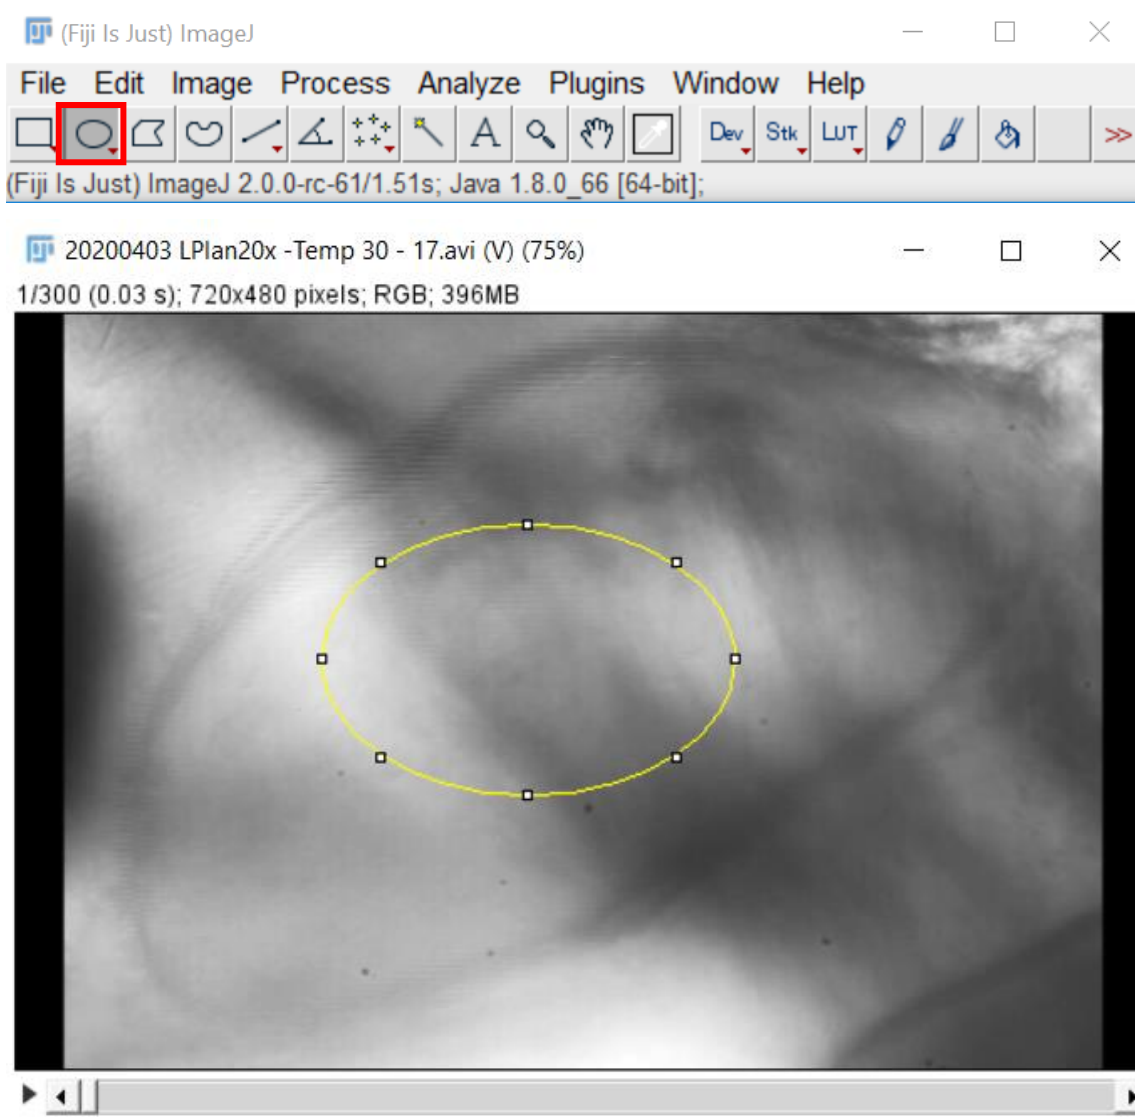

- Use \***Oval**\* brush selection to choose ROI in specific heart area
- **The ROI can be specified in middle or the entire heart region to measure the beating rate**



# Use Time Series Analyzer Plugin

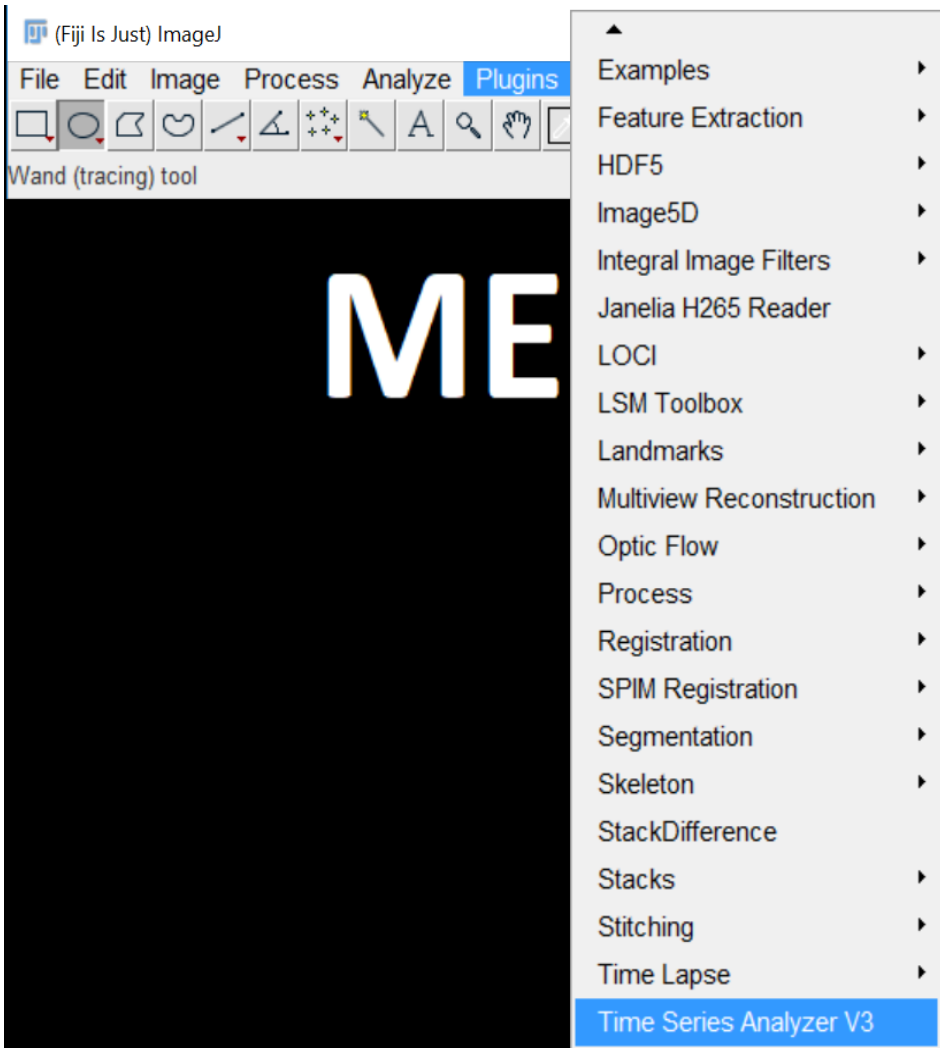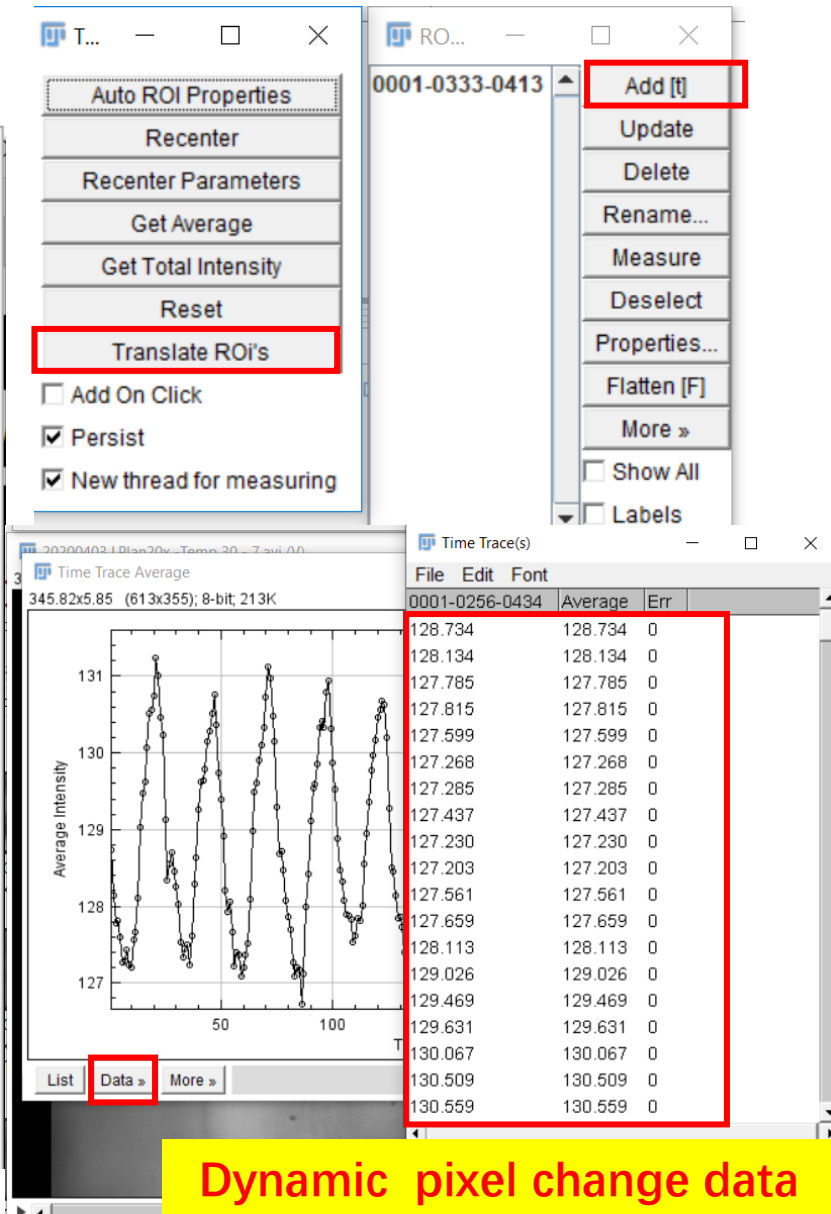

- Choose **Time Series Analyzer V3** plugin
- Click **"Add"** Button to choose ROI
- Click **"Get Average"** to get the peak and data
- Click **"Save"** in the peak window to keep the data for further analysis
- After this analysis, the **dynamic pixel change data** can be extracted into Excel



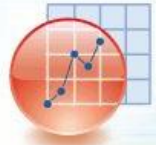

**ORIGIN® 9.1**  
Data Analysis and Graphing Software

# Input The Data Into Origin 9.1

Book1 \*

|           | A(X)    | B(Y)   | C(Y)    | D(Y)    | E(Y)    | F(Y)    |
|-----------|---------|--------|---------|---------|---------|---------|
| Long Name |         |        |         |         |         |         |
| Units     |         |        |         |         |         |         |
| Comments  | Time    | 1      | 2       | 3       | 4       | 5       |
| F(x)=     |         |        |         |         |         |         |
| 1         | 0.03333 | 95.418 | 113.231 | 123.853 | 125.36  | 116.915 |
| 2         | 0.06667 | 95.735 | 113.382 | 123.466 | 124.81  | 116.997 |
| 3         | 0.1     | 96.001 | 113.11  | 123.612 | 125.33  | 117.797 |
| 4         | 0.13333 | 96.015 | 112.853 | 124.09  | 125.395 | 118.947 |
| 5         | 0.16667 | 96.391 | 113.139 | 124.024 | 125.278 | 120.078 |
| 6         | 0.2     | 96.132 | 112.628 | 124.068 | 124.999 | 120.606 |
| 7         | 0.23333 | 96.674 | 111.905 | 124.087 | 125.542 | 121.759 |
| 8         | 0.26667 | 96.913 | 112.209 | 124.482 | 124.459 | 122.121 |
| 9         | 0.3     | 97.11  | 112.159 | 124.262 | 123.188 | 121.898 |
| 10        | 0.33333 | 96.765 | 111.423 | 124.758 | 123.228 | 121.858 |
| 11        | 0.36667 | 97.316 | 111.112 | 125.099 | 122.619 | 122.268 |
| 12        | 0.4     | 97.32  | 111.157 | 124.541 | 121.767 | 121.987 |
| 13        | 0.43333 | 97.187 | 110.714 | 125.023 | 121.955 | 122.143 |
| 14        | 0.46667 | 97.137 | 111.152 | 125.328 | 121.923 | 122.448 |
| 15        | 0.5     | 97.279 | 112.046 | 125.277 | 121.473 | 120.55  |
| 16        | 0.53333 | 97.037 | 112.248 | 124.549 | 121.576 | 119.36  |
| 17        | 0.56667 | 97.424 | 111.935 | 125.328 | 122.063 | 118.898 |
| 18        | 0.6     | 97.412 | 112.768 | 125.534 | 121.897 | 118.055 |
| 19        | 0.63333 | 97.508 | 113.159 | 125.341 | 123.013 | 117.333 |
| 20        | 0.66667 | 97.227 | 113.377 | 125.407 | 124.342 | 116.872 |
| 21        | 0.7     | 97.682 | 113.282 | 125.597 | 124.545 | 116.705 |
| 22        | 0.73333 | 97.595 | 113.859 | 125.282 | 124.982 | 116.042 |
| 23        | 0.76667 | 97.546 | 113.963 | 125.615 | 125.496 | 116.383 |
| 24        | 0.8     | 97.313 | 114.404 | 125.539 | 125.71  | 116.585 |
| 25        | 0.83333 | 97.714 | 114.552 | 125.677 | 125.345 | 117.444 |
| 26        | 0.86667 | 97.319 | 114.457 | 125.233 | 125.559 | 117.753 |
| 27        | 0.9     | 97.573 | 113.977 | 125.721 | 126.398 | 119.093 |
| 28        | 0.93333 | 97.806 | 114.677 | 125.721 | 126.427 | 120.709 |
| 29        | 0.96667 | 97.819 | 114.875 | 125.041 | 126.949 | 121.684 |
| 30        | 1       | 97.428 | 114.845 | 125.3   | 127.211 | 122.484 |

Sheet1

- The data matrix is directly copy from Excel and paste to Origin 9.1

# Make Graphic by using Origin 9.1

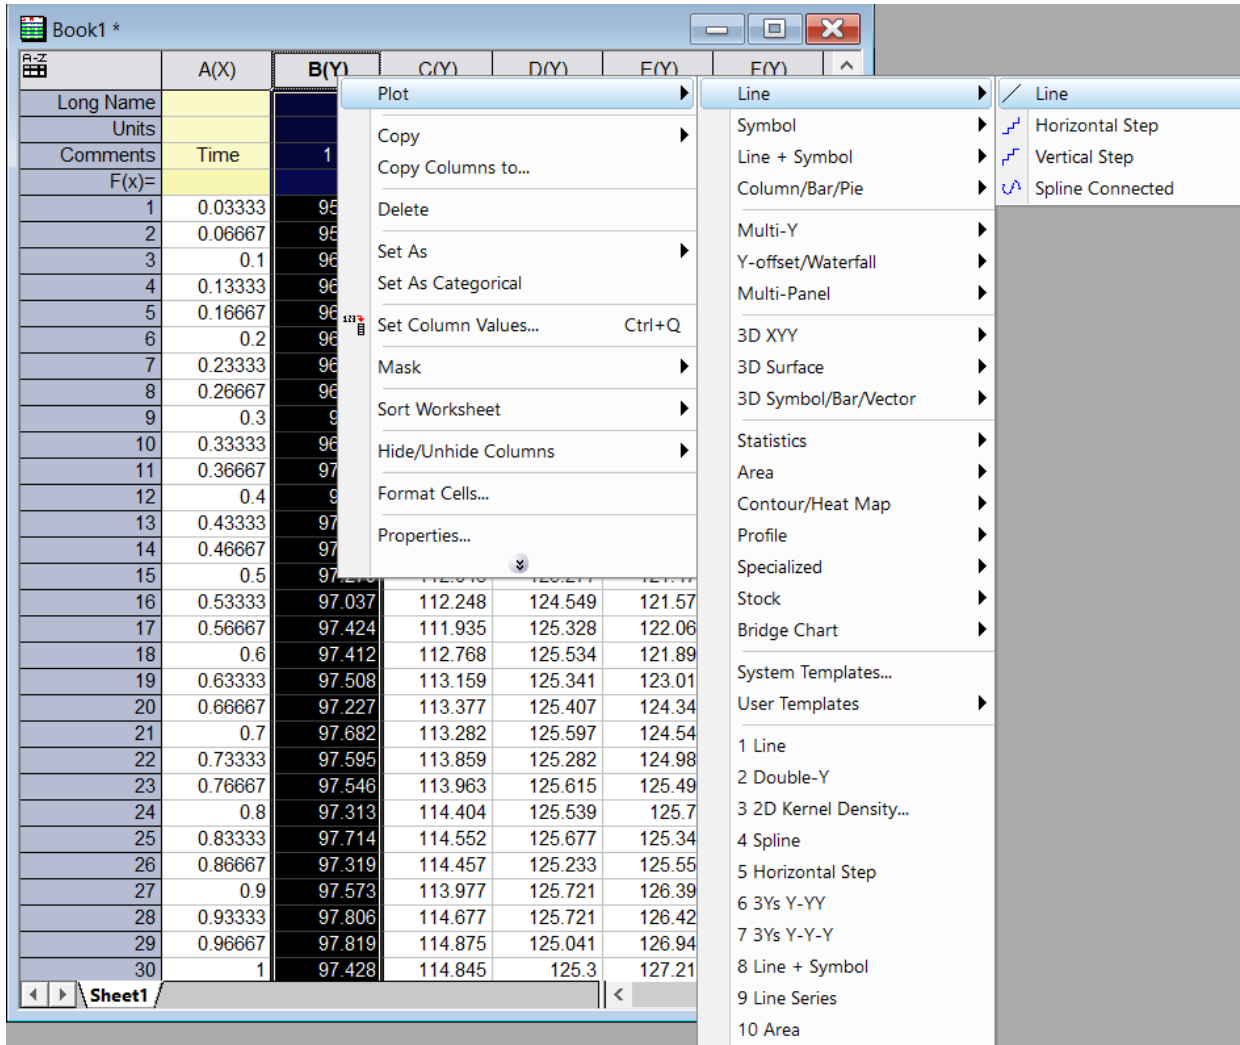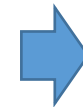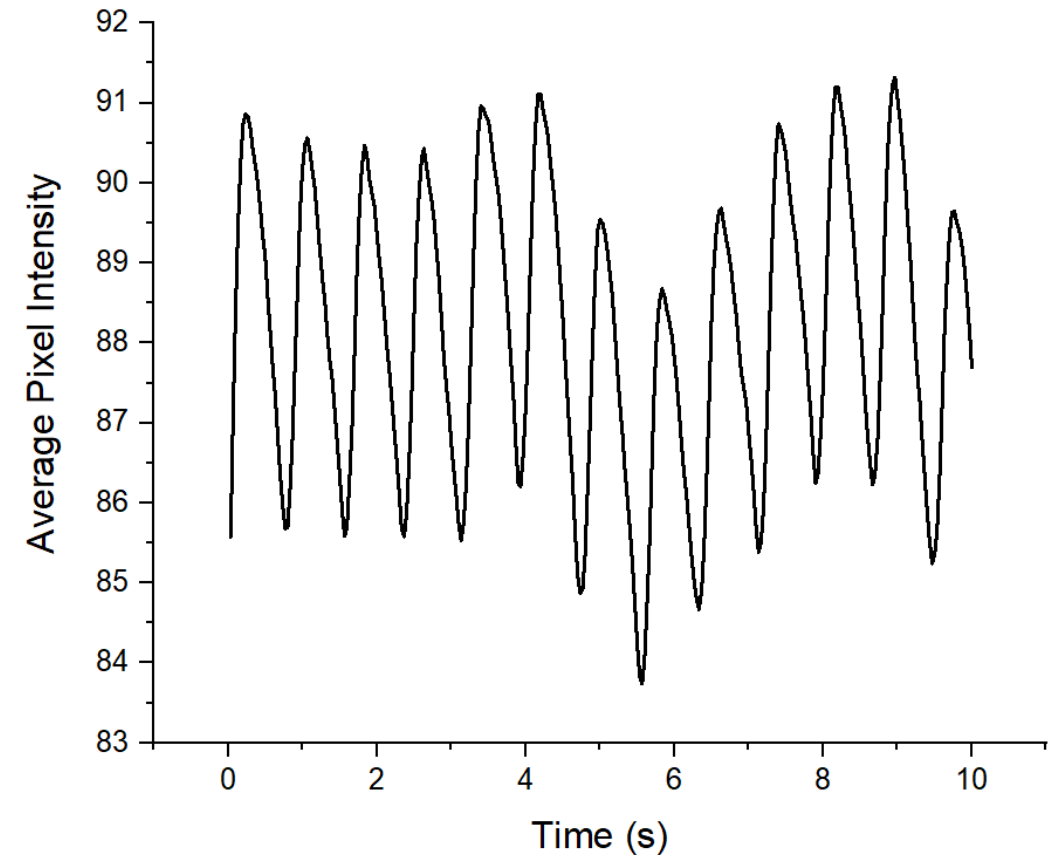



**ORIGIN® 9.1**  
Data Analysis and Graphing Software

# Use Peak Analyzer to detect the peak interval

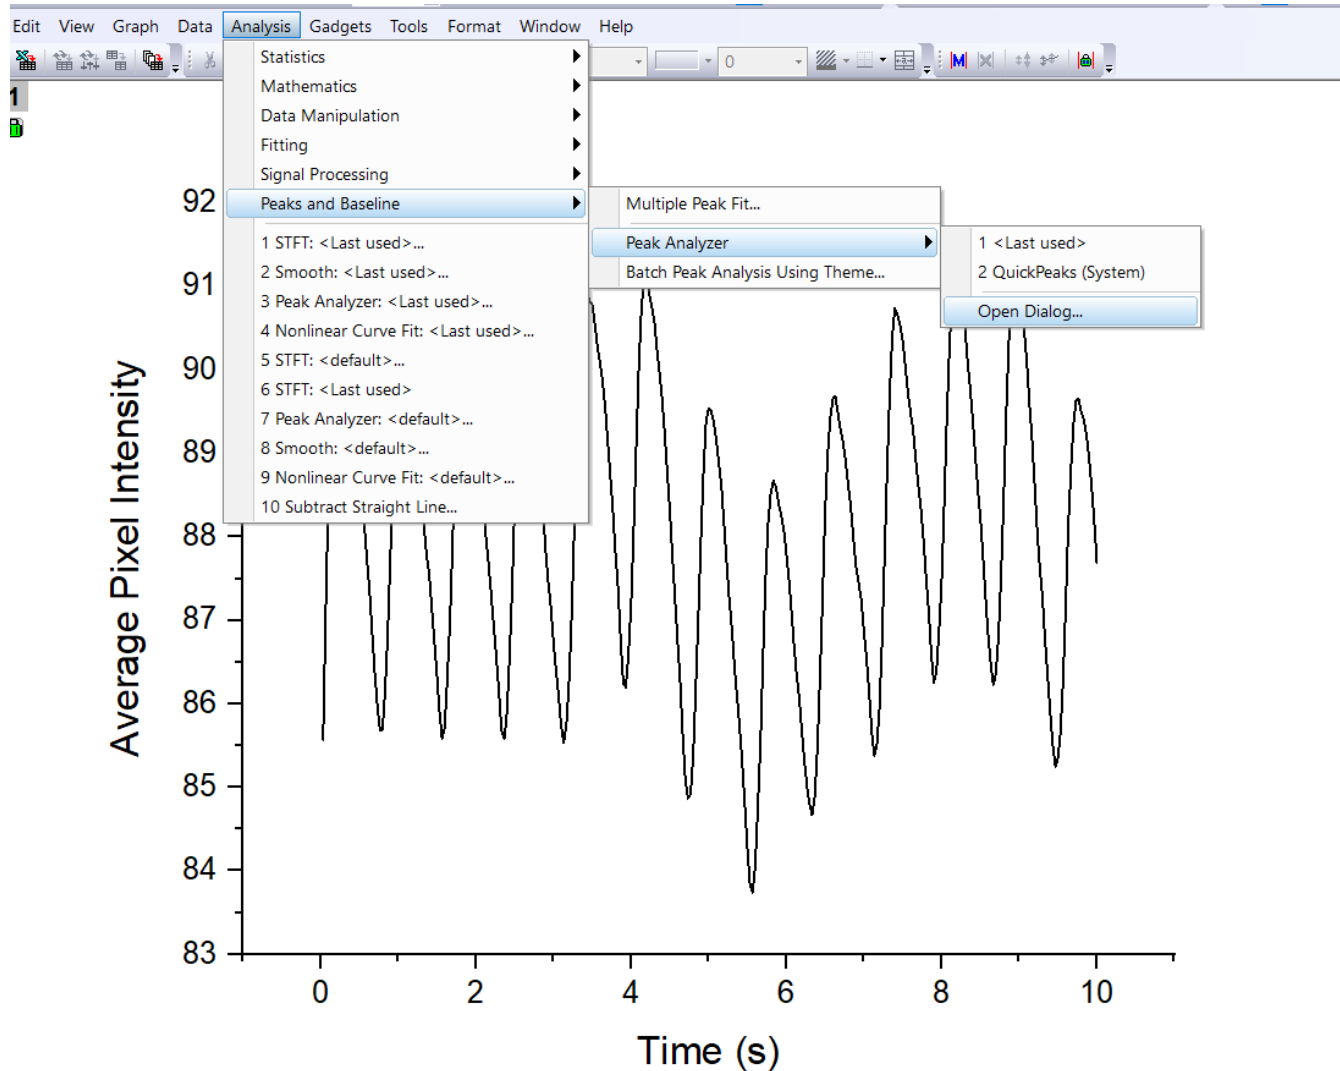

- After select graphic, in tool box, use **Analysis** -> **Peaks and Baseline** -> **Peak Analyzer** -> Open Dialog (for new setup) or Last used (for previous setup)

# Setting up Peak Analyzer

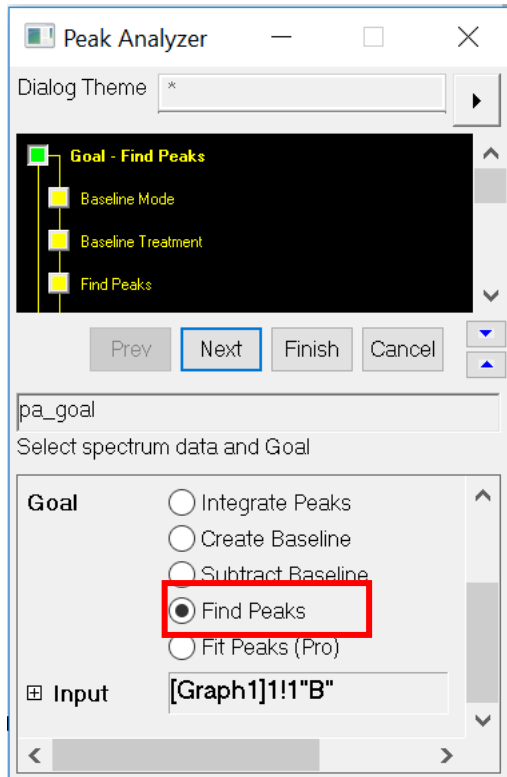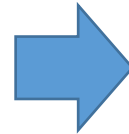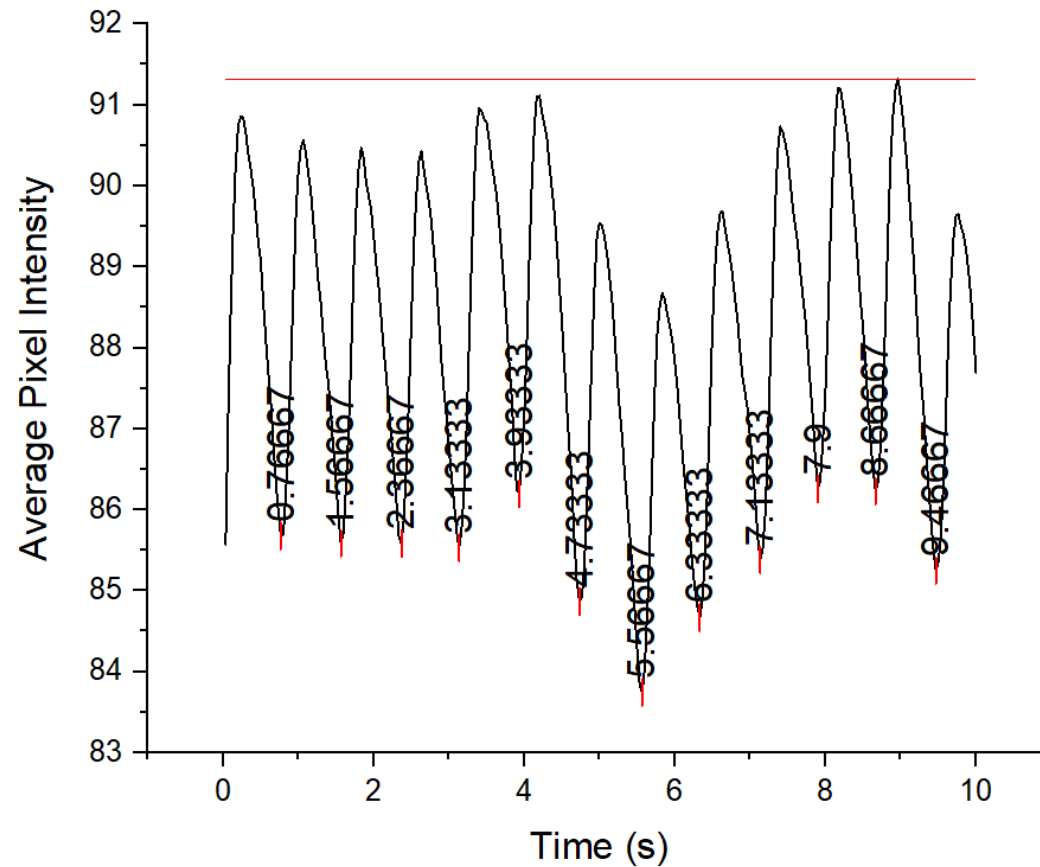

- To obtain time and intensity of each peak, we use "Find Peaks" function

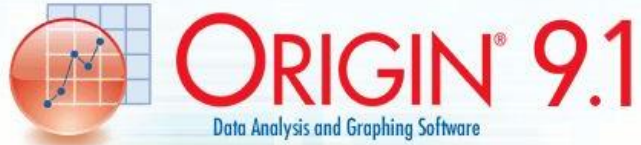

# Copy the Data for Further Analysis

Book1 \*

|           | A(X)                          | B(Y)                          |
|-----------|-------------------------------|-------------------------------|
| Long Name | Peak Centers                  | Peak Centers                  |
| Units     |                               |                               |
| Comments  | Peak Centers of "Smoothed Y1" | Peak Centers of "Smoothed Y1" |
| F(x)=     |                               |                               |
| 1         | 0.76667                       | 85.676                        |
| 2         | 1.56667                       | 85.58291                      |
| 3         | 2.36667                       | 85.57822                      |
| 4         | 3.13333                       | 85.53258                      |
| 5         | 3.93333                       | 86.20045                      |
| 6         | 4.73333                       | 84.86963                      |
| 7         | 5.56667                       | 83.73886                      |
| 8         | 6.33333                       | 84.66687                      |
| 9         | 7.13333                       | 85.38191                      |
| 10        | 7.9                           | 86.25433                      |
| 11        | 8.66667                       | 86.22774                      |
| 12        | 9.46667                       | 85.2433                       |
| 13        |                               |                               |
| 14        |                               |                               |
| 15        |                               |                               |
| 16        |                               |                               |
| 17        |                               |                               |
| 18        |                               |                               |
| 19        |                               |                               |
| 20        |                               |                               |
| 21        |                               |                               |
| 22        |                               |                               |
| 23        |                               |                               |
| 24        |                               |                               |
| 25        |                               |                               |
| 26        |                               |                               |
| 27        |                               |                               |
| 28        |                               |                               |
| 29        |                               |                               |
| 30        |                               |                               |

Sheet1 | Baseline\_Data1 | **Peak\_Centers1**

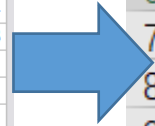

|    | A       | B              | C |
|----|---------|----------------|---|
| 1  | Time    | Peak Intensity |   |
| 2  | 0.76667 | 85.676         |   |
| 3  | 1.56667 | 85.58291       |   |
| 4  | 2.36667 | 85.57822       |   |
| 5  | 3.13333 | 85.53258       |   |
| 6  | 3.93333 | 86.20045       |   |
| 7  | 4.73333 | 84.86963       |   |
| 8  | 5.56667 | 83.73886       |   |
| 9  | 6.33333 | 84.66687       |   |
| 10 | 7.13333 | 85.38191       |   |
| 11 | 7.9     | 86.25433       |   |
| 12 | 8.66667 | 86.22774       |   |
| 13 | 9.46667 | 85.2433        |   |
| 14 |         |                |   |
| 15 |         |                |   |

- Minimize the graphic and open the sheet
- Change the window into **Peak\_Centers**
- Copy X and Y data and paste into **Excel**.
- X as the **peak time** and Y as **peak intensity**

# Insert New Column in Excel

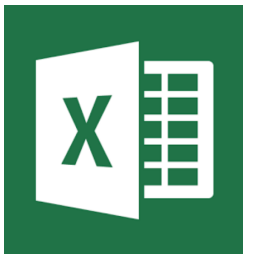

- Insert new column between time and peak to calculate time interval

|    | A       | B              |
|----|---------|----------------|
| 1  | Time    | Peak Intensity |
| 2  | 0.76667 | 85.676         |
| 3  | 1.56667 | 85.58291       |
| 4  | 2.36667 | 85.57822       |
| 5  | 3.13333 | 85.53258       |
| 6  | 3.93333 | 86.20045       |
| 7  | 4.73333 | 84.86963       |
| 8  | 5.56667 | 83.73886       |
| 9  | 6.33333 | 84.66687       |
| 10 | 7.13333 | 85.38191       |
| 11 | 7.9     | 86.25433       |
| 12 | 8.66667 | 86.22774       |
| 13 | 9.46667 | 85.2433        |
| 14 |         |                |
| 15 |         |                |
| 16 |         |                |

|    | A       | B             | C              | D |
|----|---------|---------------|----------------|---|
| 1  | Time    | Time Interval | Peak Intensity |   |
| 2  | 0.76667 | =A3-A2        | 85.676         |   |
| 3  | 1.56667 |               | 85.58291       |   |
| 4  | 2.36667 |               | 85.57822       |   |
| 5  | 3.13333 |               | 85.53258       |   |
| 6  | 3.93333 |               | 86.20045       |   |
| 7  | 4.73333 |               | 84.86963       |   |
| 8  | 5.56667 |               | 83.73886       |   |
| 9  | 6.33333 |               | 84.66687       |   |
| 10 | 7.13333 |               | 85.38191       |   |
| 11 | 7.9     |               | 86.25433       |   |
| 12 | 8.66667 |               | 86.22774       |   |
| 13 | 9.46667 |               | 85.2433        |   |
| 14 |         |               |                |   |
| 15 |         |               |                |   |

|    | A       | B             | C              |
|----|---------|---------------|----------------|
| 1  | Time    | Time Interval | Peak Intensity |
| 2  | 0.76667 | 0.8           | 85.676         |
| 3  | 1.56667 | 0.8           | 85.58291       |
| 4  | 2.36667 | 0.76666       | 85.57822       |
| 5  | 3.13333 | 0.8           | 85.53258       |
| 6  | 3.93333 | 0.8           | 86.20045       |
| 7  | 4.73333 | 0.83334       | 84.86963       |
| 8  | 5.56667 | 0.76666       | 83.73886       |
| 9  | 6.33333 | 0.8           | 84.66687       |
| 10 | 7.13333 | 0.76667       | 85.38191       |
| 11 | 7.9     | 0.76667       | 86.25433       |
| 12 | 8.66667 | 0.8           | 86.22774       |
| 13 | 9.46667 | -9.46667      | 85.2433        |
| 14 |         |               |                |

- In time interval column, use formula:  $= (A3 - A2)$  or two time point that want to be analysed
- Drag down the formula and delete the last calculation as it will show false result



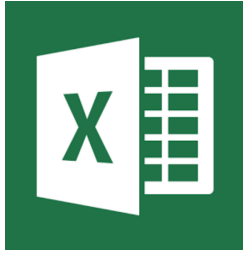

# Calculate Time Interval and Beat per Minute

|    | A       | B                           | C              |    | A       | B             | C              |
|----|---------|-----------------------------|----------------|----|---------|---------------|----------------|
| 1  | Time    | Time Interval               | Peak Intensity | 1  | Time    | Time Interval | Peak Intensity |
| 2  | 0.76667 | 0.8                         | 85.676         | 2  | 0.76667 | 0.8           | 85.676         |
| 3  | 1.56667 | 0.8                         | 85.58291       | 3  | 1.56667 | 0.8           | 85.58291       |
| 4  | 2.36667 | 0.76666                     | 85.57822       | 4  | 2.36667 | 0.76666       | 85.57822       |
| 5  | 3.13333 | 0.8                         | 85.53258       | 5  | 3.13333 | 0.8           | 85.53258       |
| 6  | 3.93333 | 0.8                         | 86.20045       | 6  | 3.93333 | 0.8           | 86.20045       |
| 7  | 4.73333 | 0.83334                     | 84.86963       | 7  | 4.73333 | 0.83334       | 84.86963       |
| 8  | 5.56667 | 0.76666                     | 83.73886       | 8  | 5.56667 | 0.76666       | 83.73886       |
| 9  | 6.33333 | 0.8                         | 84.66687       | 9  | 6.33333 | 0.8           | 84.66687       |
| 10 | 7.13333 | 0.76667                     | 85.38191       | 10 | 7.13333 | 0.76667       | 85.38191       |
| 11 | 7.9     | 0.76667                     | 86.25433       | 11 | 7.9     | 0.76667       | 86.25433       |
| 12 | 8.66667 | 0.8                         | 86.22774       | 12 | 8.66667 | 0.8           | 86.22774       |
| 13 | 9.46667 |                             | 85.2433        | 13 | 9.46667 |               | 85.2433        |
| 14 |         |                             |                | 14 |         |               |                |
| 15 |         | =average(B2:B12)            |                | 15 |         | 0.790909091   |                |
| 16 |         | AVERAGE(number1, [number2], |                | 16 |         | =60/B15       |                |
| 17 |         |                             |                | 17 |         |               |                |
| 18 |         |                             |                |    |         |               |                |

- Calculate average time interval by using the formula:  
=AVERAGE(B2:B12) or the average of selected time interval
- Calculate the average heart rate (bpm) by using the formula:  
=60/average time interval



Perform Short-time Fourier transform (STFT) to get heart beat frequency over time changes

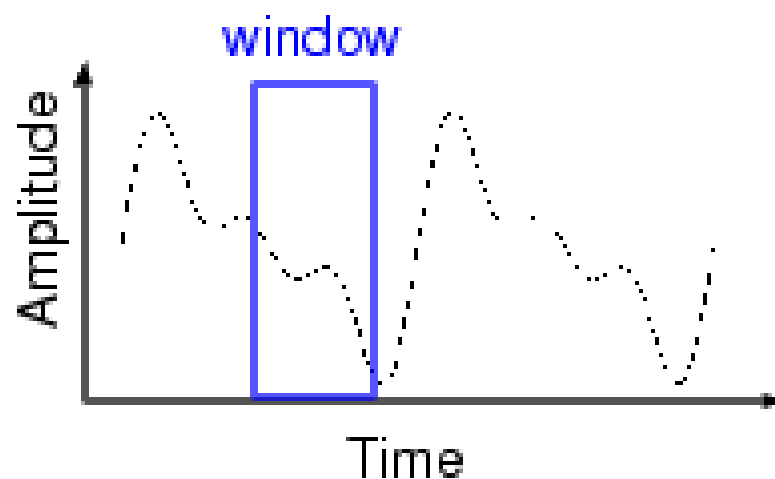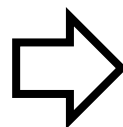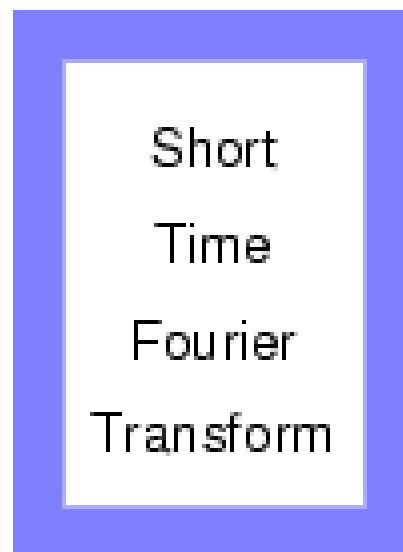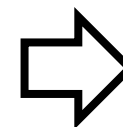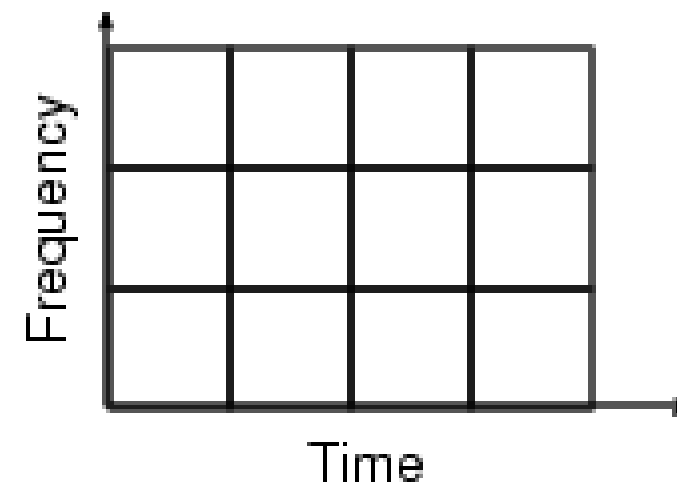



ORIGIN® 9.1

Data Analysis and Graphing Software

Perform **STFT** by using Origin 9.1 software

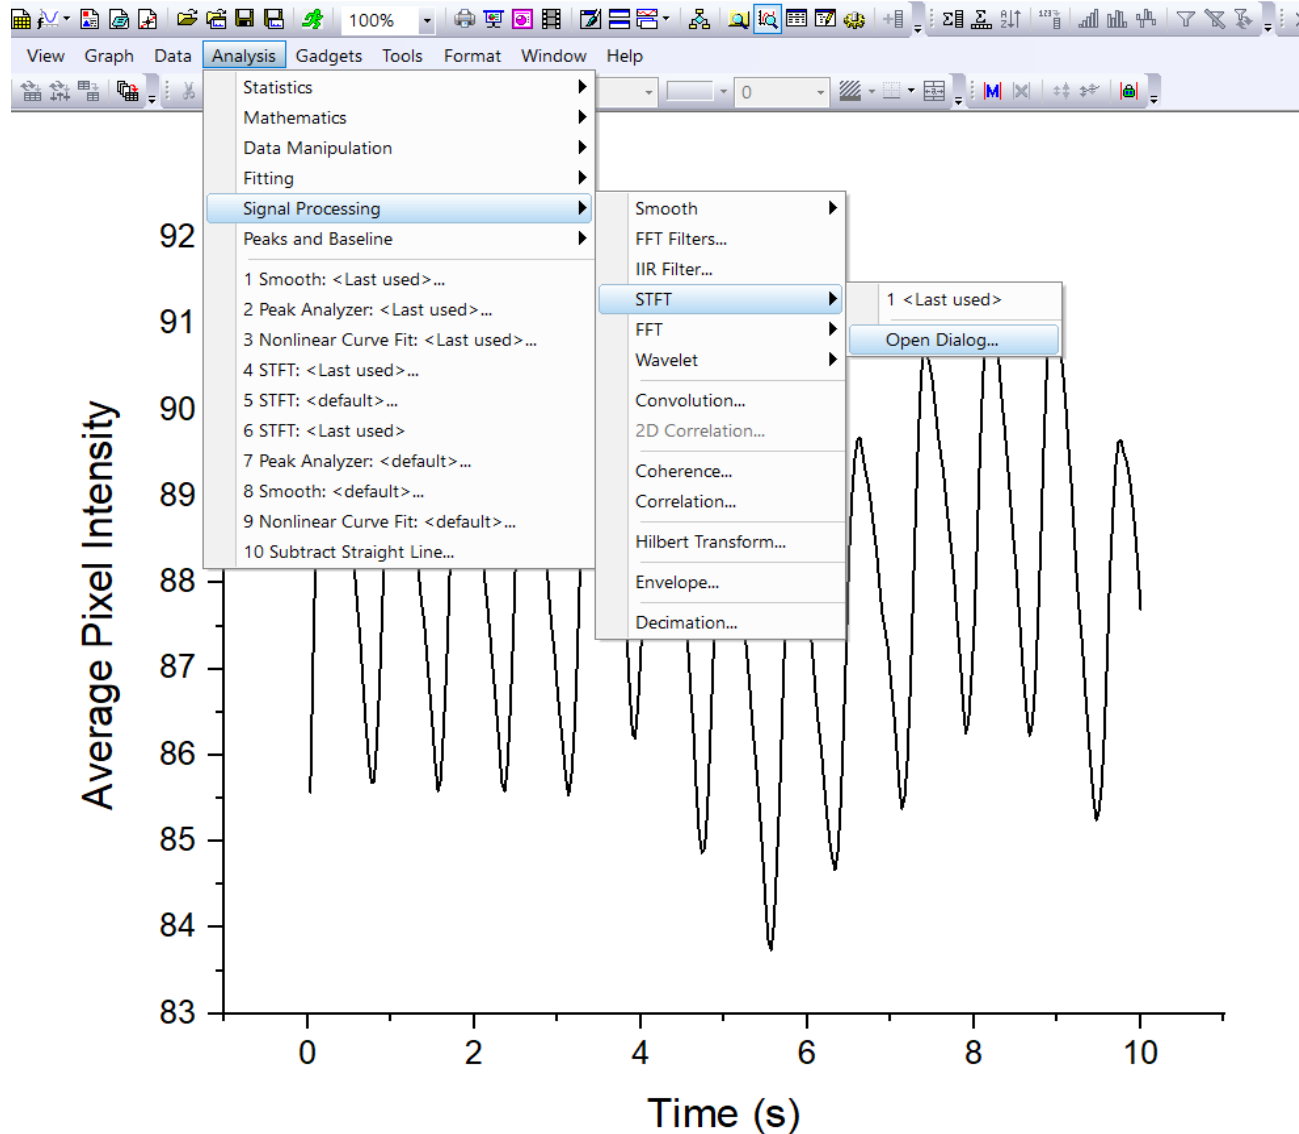

- Click **Analysis** -> **Signal Processing** -> **STFT** -> Open Dialog (for new setup) or <Last used> for previous setup



ORIGIN® 9.1  
Data Analysis and Graphing Software

# Perform STFT by using Origin 9.1 software

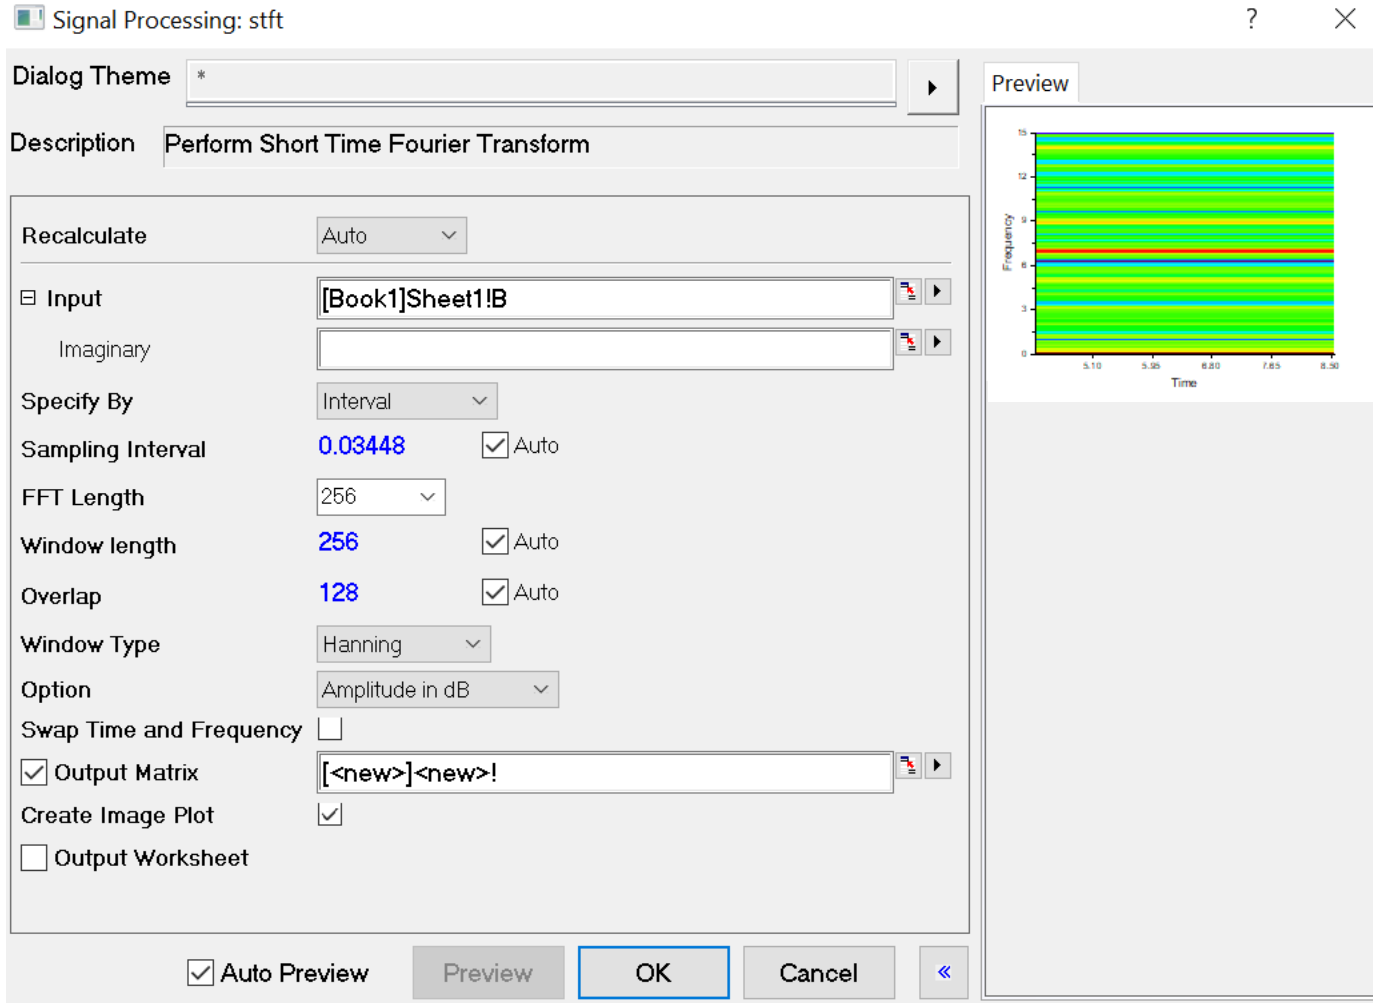

- Change the setup based on the need
- On this experiment, no need to change the parameter (we use the **default setting**)

# Change Scale in **STFT** Result

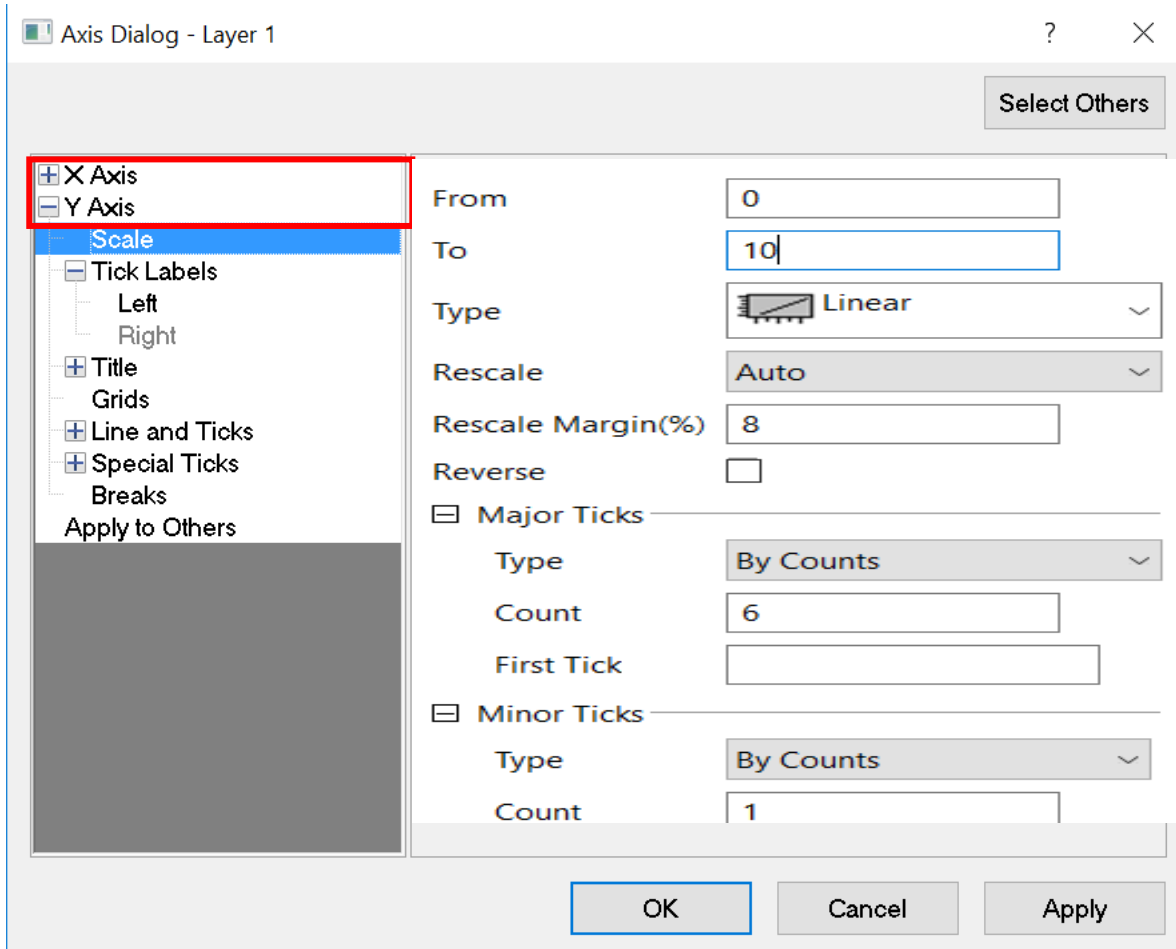

- When the scale range is too wide, it can be adjusted
- To change the X and Y scale double click on the graphic result



ORIGIN<sup>®</sup> 9.1  
Data Analysis and Graphing Software

## Changed Scale STFT Result

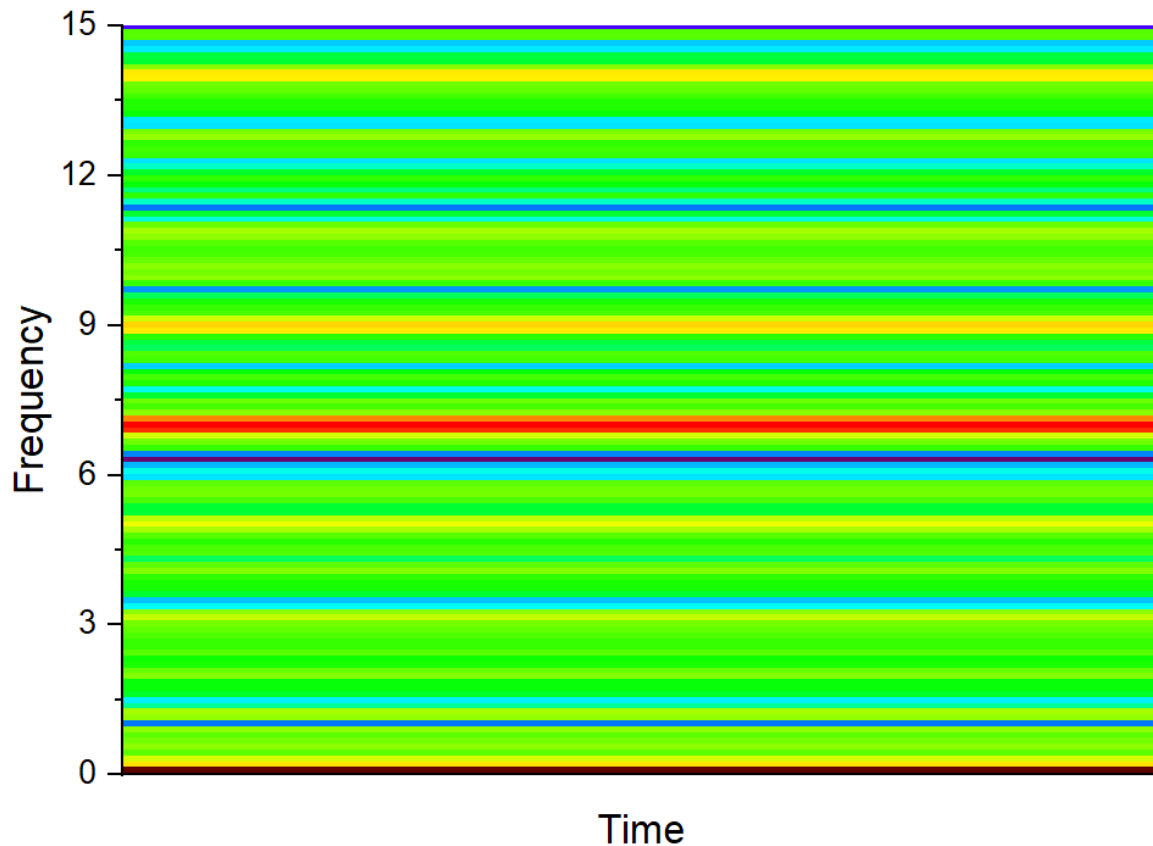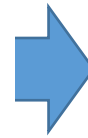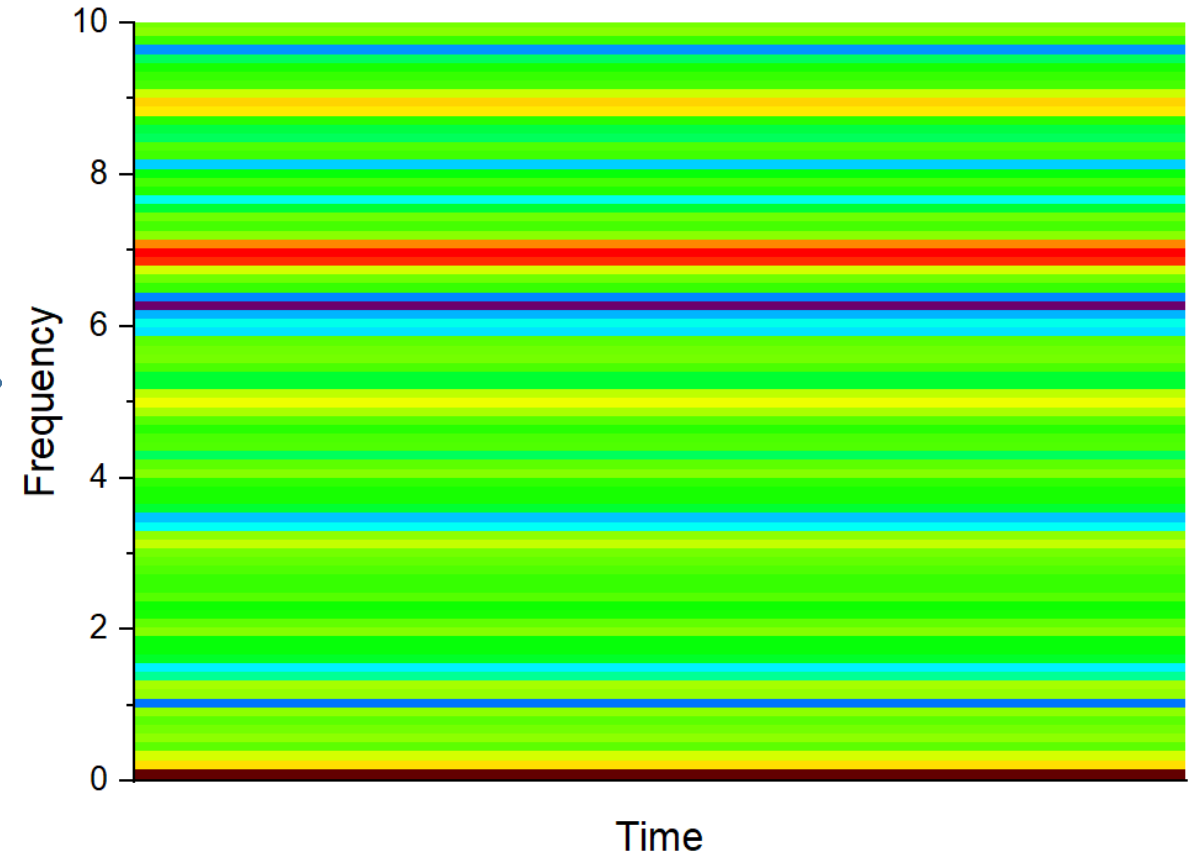

The Daphnia heart beat Frequency  
= 6.8 – 7.0 Hz = 408-420 bpm

# Perform **Poincare Plot** by using Origin 9.1 software

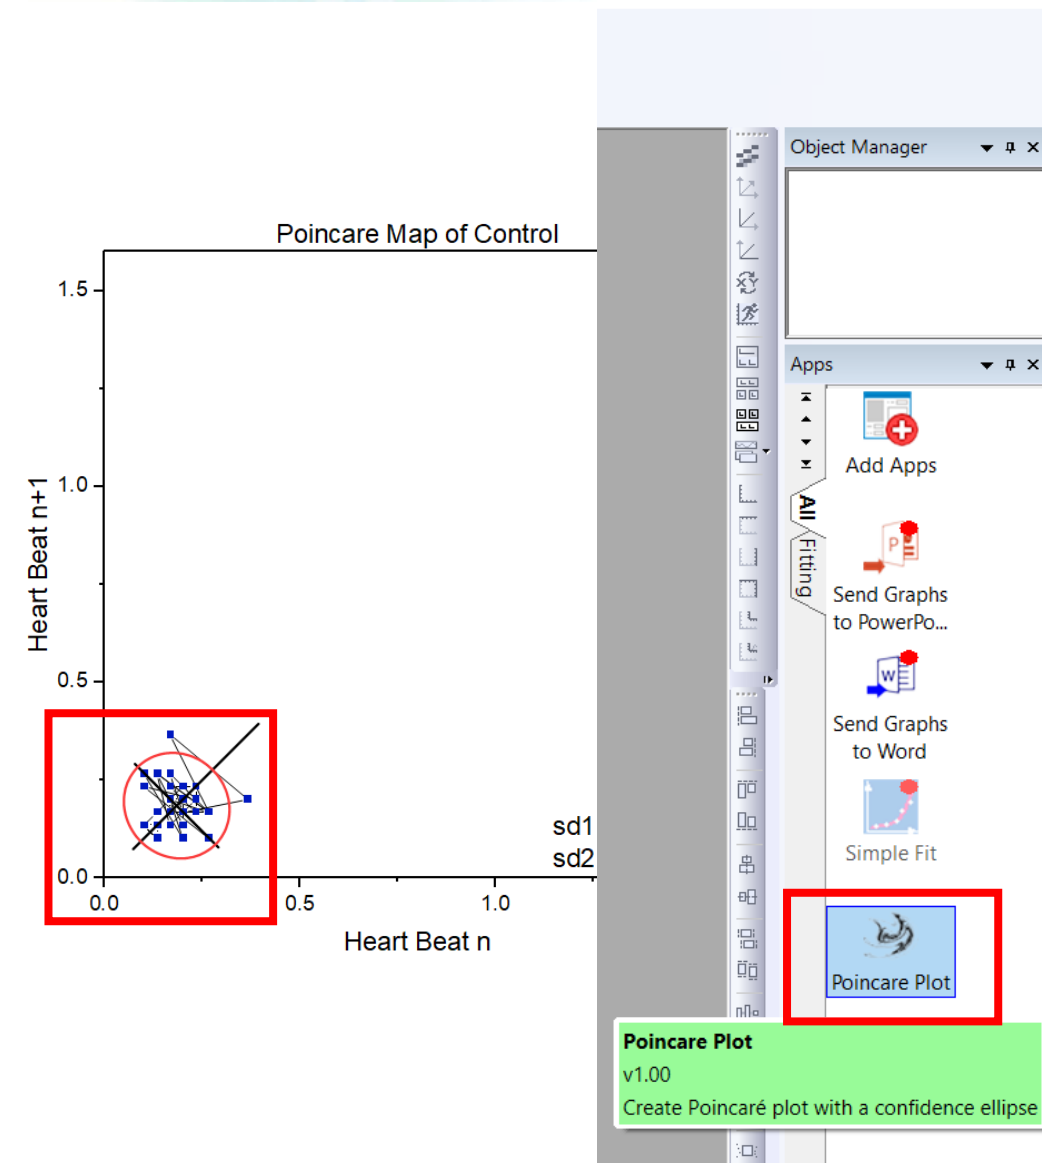

- Poincare Plot, is a scatter graph that visualize the heart rate variability (HRV)
- Poincare Plot plugin can be **downloaded** from <https://www.originlab.com/fileExchange/details.aspx?fid=404>
- After download, then the File need to be **drag and drop into the Origin Workspace** , therefore the icon can be seen on the right side

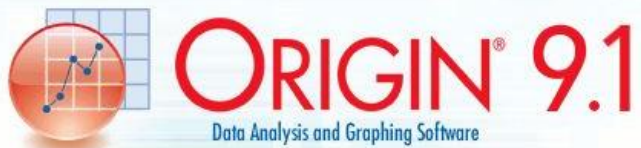

# Perform **Poincare Plot** by using Origin 9.1 software

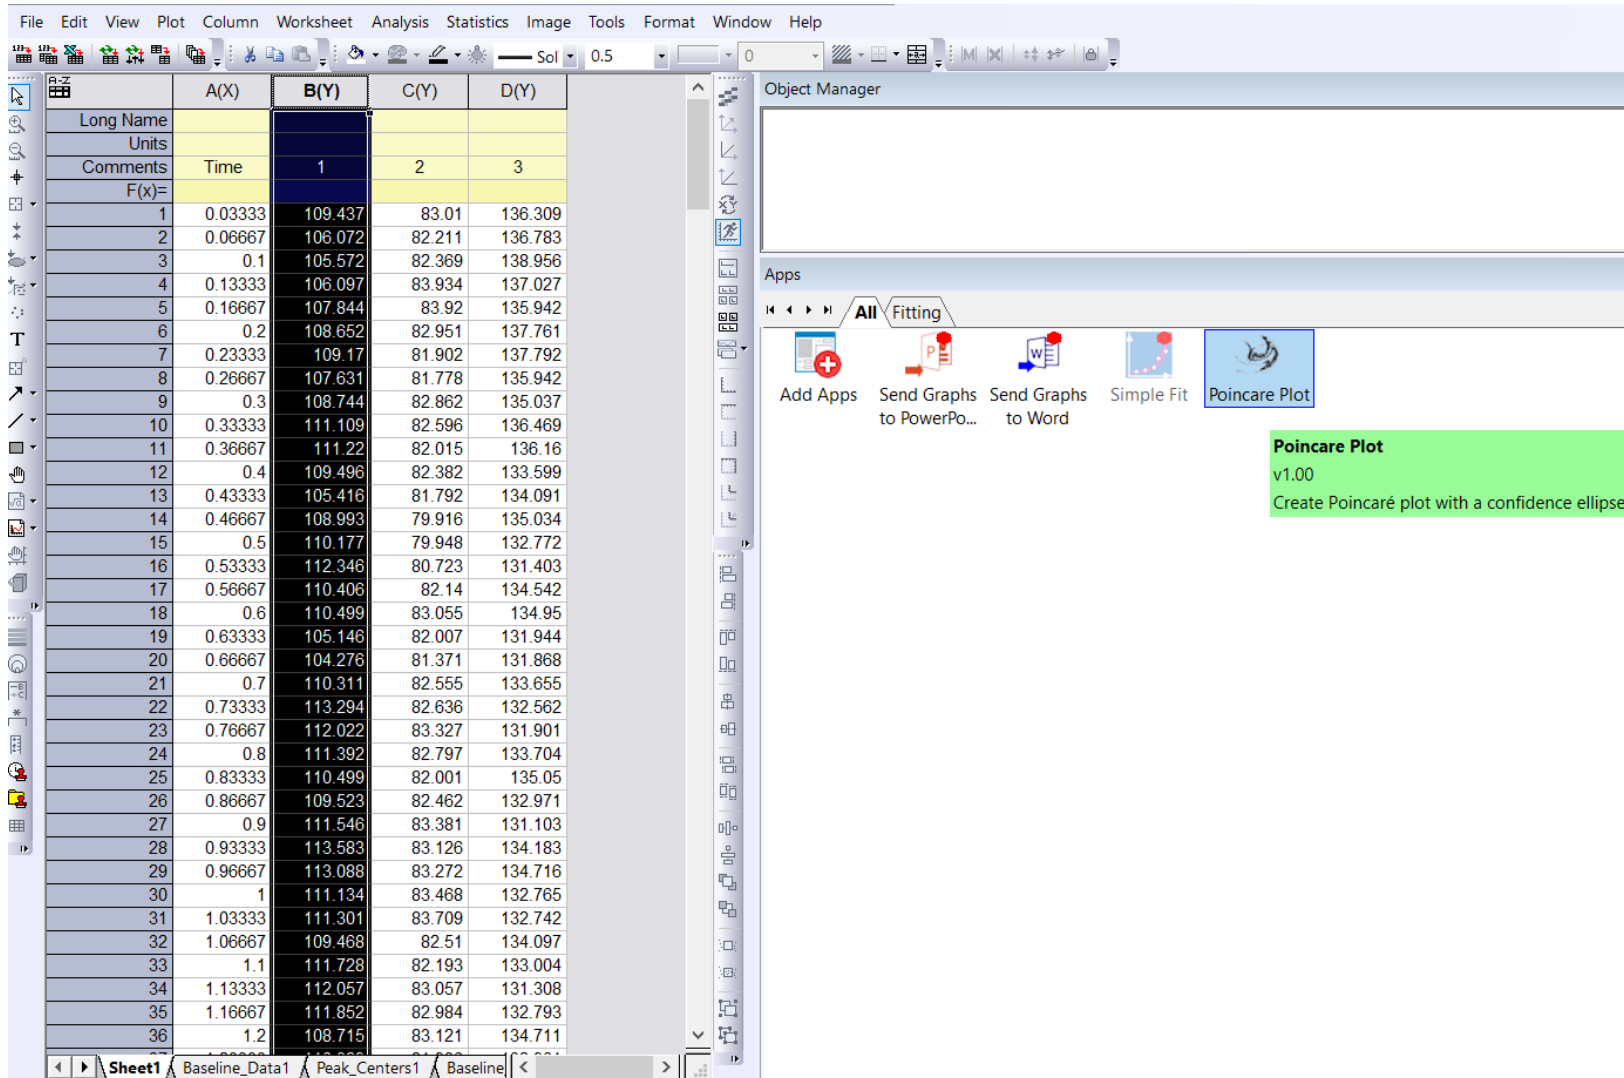

- Copy all the data into Origin 9.1
- Choose 1 column of data and **perform Poincare Plot**



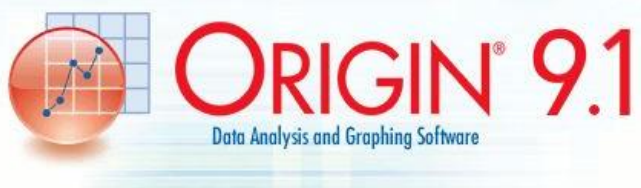

# Perform **Poincare Plot** by using Origin 9.1 software

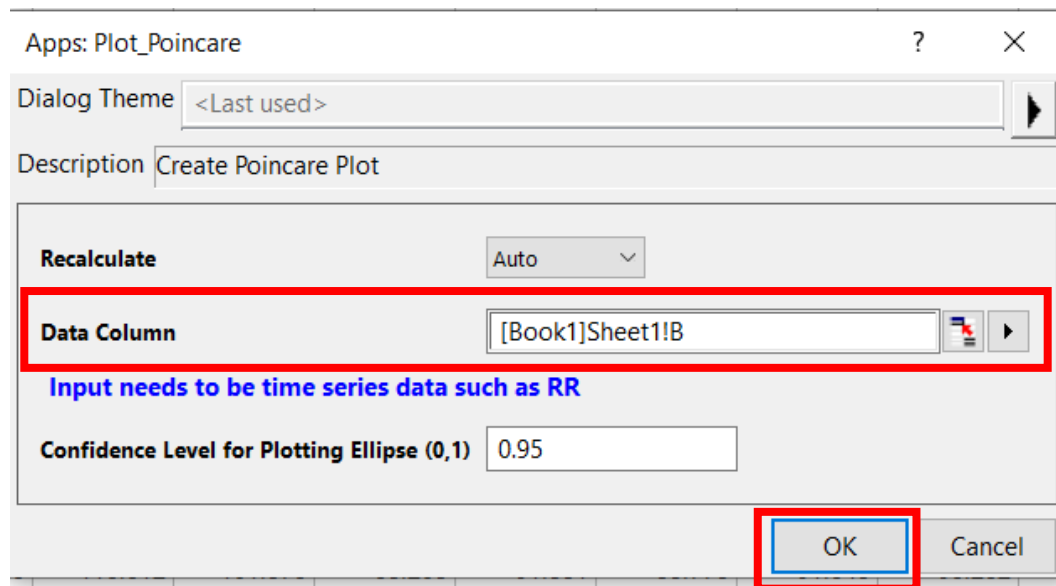

- After performing Poincare plot, it will open a new dialog → make sure the “**Data Column**” is correct → Press **OK**

**High speed Video  
recording**



**Blood flow velocity  
calculation**



**Heartbeat  
calculation**



**Cardiac function  
assessment**

**Heartbeat rate  
(HR)**

**SFFT**

**Poincare plot**

**Stroke volume  
(SV)**

**Fractional  
Shortening (FS)**

**Cardiac output  
(CO)**

**Ejection Fraction  
(EF)**

# CARDIOVASCULAR FUNCTION MEASUREMENT

To measure other parameter of cardiovascular function, we first calculate the diameter of the heart at diastolic and systolic stage, where  $D_L$  refers to the length of the long diagonal axis and  $D_S$  refers to the length of the short diagonal axis

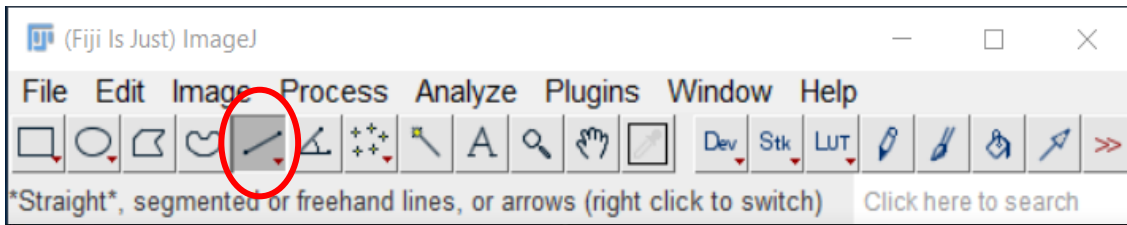

“Straight” line plugin in ImageJ was used to measure the diameter of the heart

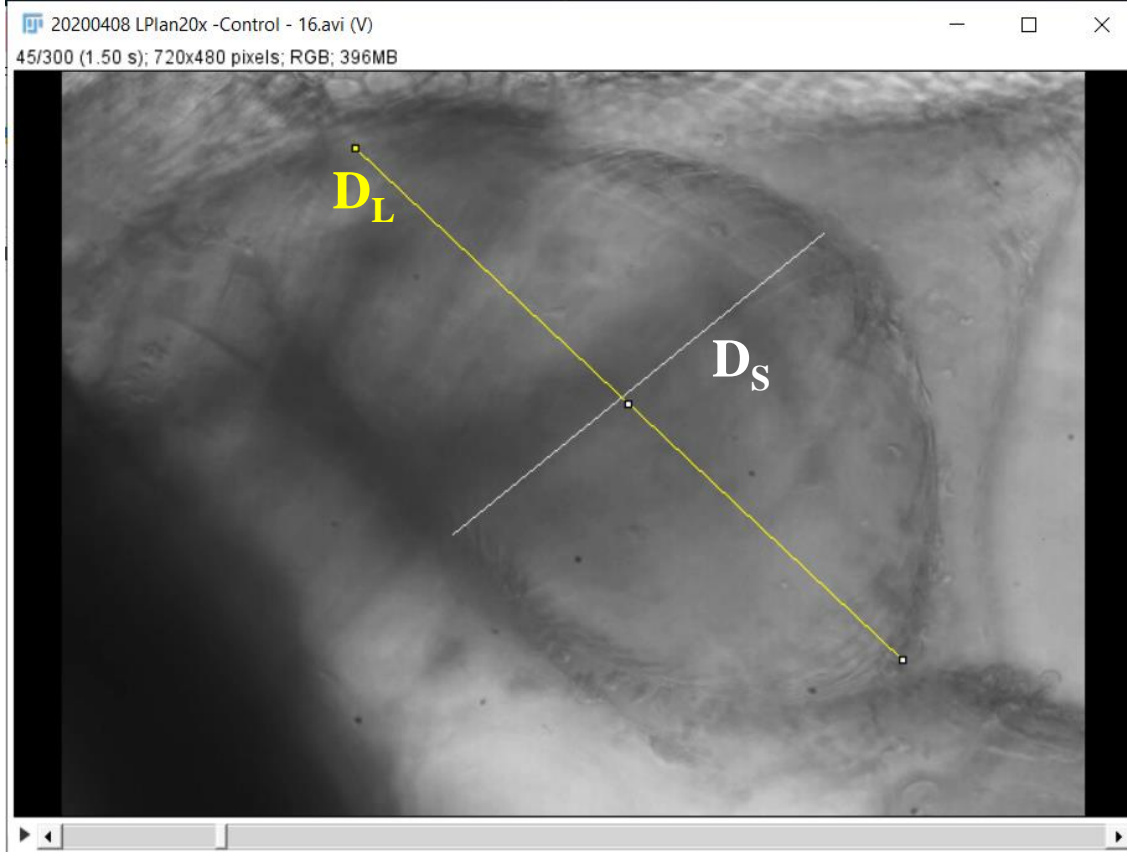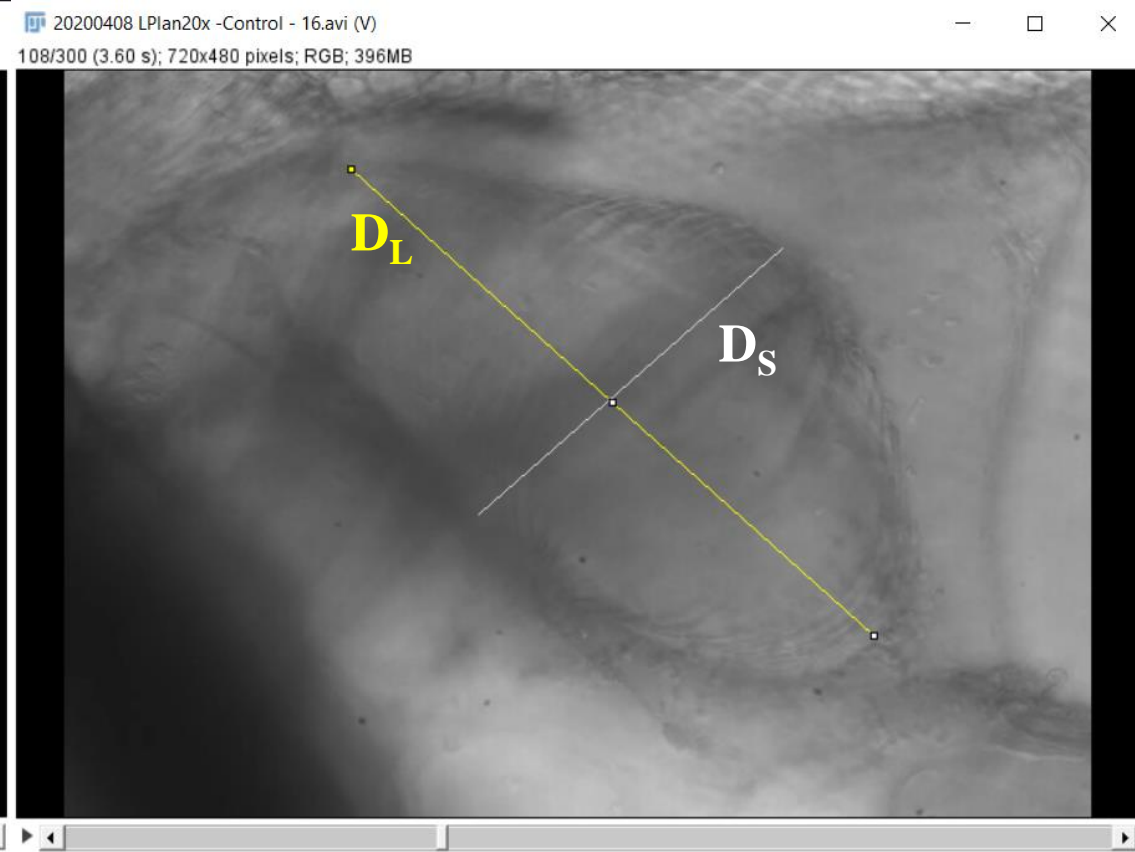

# STROKE VOLUME & CARDIAC OUTPUT MEASUREMENT

**Stroke volume (SV)**, the volume ejected in each heartbeat was calculated by **subtract** the heart end diastolic volume (**EDV**) and end systolic volume (**ESV**). (Equation 1). Daphnids was considered to **have heart with ellipsoid shape**, therefore the heart volume can be measured by using Equation (2)

(Equation 1)

$$SV = EDV - ESV$$

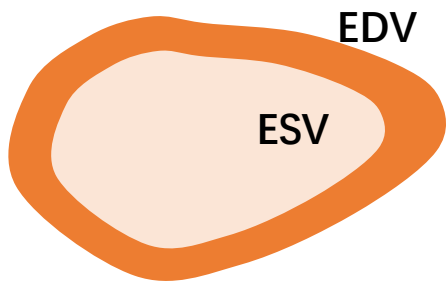

(Equation 2)

$$\text{Volume} = \frac{1}{6} \times \pi \times D_L \times D_S^2$$

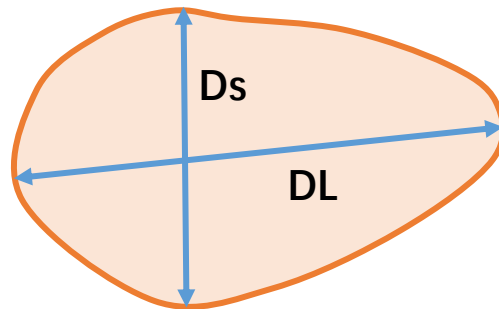

**Cardiac output (CO)** is the amount of blood the heart pumps in 1 minute. It is determined by multiplying the heart rate by the stroke volume

$$CO = SV \times HR$$

# FRACTIONAL SHORTENING & EJECTION FRACTION MEASUREMENT

**Fractional shortening (FS)** is calculated by measuring the percentage change in heart diameter during diastolic and systolic phase (Equation 3), where  $D_{SD}$  refers to the length of the short diagonal axis at diastolic phase and  $D_{SS}$  refers to the length of the short diagonal axis at systolic phase.

**Ejection Fraction (EF)** is the percentage change in end diastolic volume and was calculated by Equation 4

(Equation 3)

$$FS = \frac{D_{SD} - D_{SS}}{D_{SS}} \times 100\%$$

(Equation 4)

$$EF = \frac{SV}{EDV} \times 100\%$$

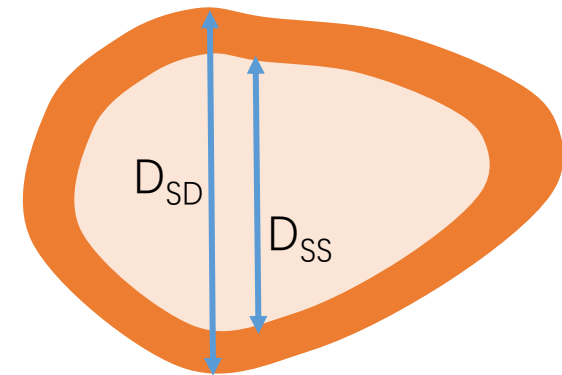

Supplement: s1 [file s1]
